# Supplementary material for: A global assessment of gross and net land change dynamics for current conditions and future scenarios
Source: Copernicus journal article supplement (doi:10.5194/esd-2017-121), 2017-12-15
Supplement: Supplementary file 1 [file Supplement S1.pdf › Supplement S1.pdf]

## 1 Class aggregation for each product:

**Table S1:** Class aggregation of NLCD data.

| Original class               | Aggregated class |
|------------------------------|------------------|
| Open Water                   | Other land       |
| Perennial ice/snow           | Other land       |
| Developed open space         | Settlement       |
| Developed, low intensity     | Settlement       |
| Developed, medium intensity  | Settlement       |
| Developed, high intensity    | Settlement       |
| Barren                       | Other land       |
| Deciduous forest             | Forest           |
| Evergreen forest             | Forest           |
| Deciduous forest II          | Forest           |
| Shrub/scrub                  | Grassland        |
| Grassland/herbaceous         | Grassland        |
| Pasture/hay                  | Grassland        |
| Cultivated crops             | Cropland         |
| Woody wetlands               | Forest           |
| Emergent herbaceous wetlands | Grassland        |

**Table S2:** Class aggregation of CORINE (CLC) data.

| Original class                               | Aggregated class |
|----------------------------------------------|------------------|
| Continuous urban fabric                      | Settlement       |
| Discontinuous urban fabric                   | Settlement       |
| Industrial or commercial units               | Settlement       |
| Road and rail networks and associated land   | Settlement       |
| Port areas                                   | Settlement       |
| Airports                                     | Settlement       |
| Mineral extraction sites                     | Settlement       |
| Dump sites                                   | Settlement       |
| Construction sites                           | Settlement       |
| Green urban areas                            | Settlement       |
| Sport and leisure facilities                 | Settlement       |
| Non irrigated arable land                    | Cropland         |
| Permanently irrigated land                   | Cropland         |
| Rice fields                                  | Cropland         |
| Vineyards                                    | Cropland         |
| Fruit trees and berry plantations            | Cropland         |
| Olive groves                                 | Cropland         |
| Pastures                                     | Grassland        |
| Annual crops associated with permanent crops | Cropland         |
| Complex cultivation patterns                 | Cropland         |
| Land principally occupied by agriculture     | Grassland        |

|                                |            |
|--------------------------------|------------|
| Agro-forestry areas            | Cropland   |
| Broad-leaved forest            | Forest     |
| Coniferous forest              | Forest     |
| Mixed forest                   | Forest     |
| Natural grasslands             | Grassland  |
| Moors and heathland            | Grassland  |
| Sclerophyllous vegetation      | Grassland  |
| Transitional woodland shrub    | Forest     |
| Beaches, dunes and sand plains | Other land |
| Bare rock                      | Other land |
| Sparsely vegetated areas       | Other land |
| Burned areas                   | Other land |
| Glaciers and perpetual snow    | Other land |
| Inland marshes                 | Grassland  |
| Peat bogs                      | Grassland  |
| Salt marshes                   | Grassland  |
| Salines                        | Other land |
| Intertidal flats               | Other land |
| Water courses                  | Other land |
| Water bodies                   | Other land |
| Coastal lagoons                | Other land |
| Estuaries                      | Other land |
| Sea and ocean                  | Other land |

**Table S3:** Class aggregation of Globeland30 data.

| Original class      | Aggregated class |
|---------------------|------------------|
| Cultivated land     | Cropland         |
| Forest              | Forest           |
| Grassland           | Grassland        |
| Shrubland           | Grassland        |
| Wetland             | Grassland        |
| Water bodies        | Other land       |
| Tundra              | Grassland        |
| Artificial surfaces | Settlement       |
| Bareland            | Other land       |
| Permanent snow/ice  | Other land       |

**Table S4:** Class aggregation of RCMRD data. **Note:** We used for all RCMRD data the classification Scheme I for aggregation.

| Original class | Aggregated class |
|----------------|------------------|
| Forestland     | Forest           |
| Grassland      | Grassland        |
| Cropland       | Cropland         |
| Wetland        | Grassland        |

|            |            |
|------------|------------|
| Settlement | Settlement |
| Otherland  | Other land |

**Table S5:** Class aggregation of India LC data.

| Original class   | Aggregated class |
|------------------|------------------|
| Barren land      | Other land       |
| Built and Urban  | Settlement       |
| Cropland         | Cropland         |
| Deciduous forest | Forest           |
| Evergreen forest | Forest           |
| Fallow land      | Grassland        |
| Grassland        | Grassland        |
| Mangroves        | Forest           |
| Mixed forest     | Forest           |
| Plantations      | Forest           |
| Shrubland        | Grassland        |
| Waste land       | Other land       |
| Water bodies     | Other land       |
| Others           | Other land       |

**Table S6:** Class aggregation of MoFor data.

| Original class                        | Aggregated class |
|---------------------------------------|------------------|
| Primary Upland Forest                 | Forest           |
| Secondary Upland Forest/Logged Forest | Forest           |
| Primary Swamp Forest                  | Forest           |
| Secondary Swamp Forest/Logged Area    | Forest           |
| Primary Mangrove Forest               | Forest           |
| Secondary Mangrove Forest/ Logged     | Forest           |
| Crop Forest                           | Cropland         |
| Plantation/Garden                     | Forest           |
| Bushes/Shrubland                      | Grassland        |
| Swampy Bush                           | Grassland        |
| Savanna                               | Grassland        |
| Upland Farming                        | Cropland         |
| Upland Farming Mixed with Bush        | Cropland         |
| Rice field                            | Cropland         |
| Cultured Fisheries/Fishpond           | Other land       |
| Settlement/Developed Land             | Settlement       |
| Transmigration                        | Settlement       |
| Open Land                             | Other land       |
| Mining/mines                          | Settlement       |
| Water Body                            | Other land       |
| Swamp                                 | Grassland        |

|                |                               |
|----------------|-------------------------------|
| Cloud          | *these areas were masked out* |
| Airport/Harbor | Other land                    |

## 2 Pixel shift in Globeland30 and India LC products:

For the Indian LC 1995 to 2005 and for some regions in the Globeland30, we recognized a shift by one pixel between the individual years that were used to calculate the change. This shift caused regular change areas at the borders of class patches (refer to figure S1 (left)). We checked for preprocessing errors from our side, but these shifts also appeared in other applications using a different processing software. Furthermore, the shift was visible in the original data sources. Since both products based on Landsat satellite data, we assume that the original products suffer from errors in the geo-correction procedure. In order to solve this problem, we used a filtering technique to remove change areas caused by this shift, by first applying an expand filter of one pixel for the stable land cover/use classes and second a shrink filter of one pixel for the same classes. The results of the filtering are shown in figure S1 (right).

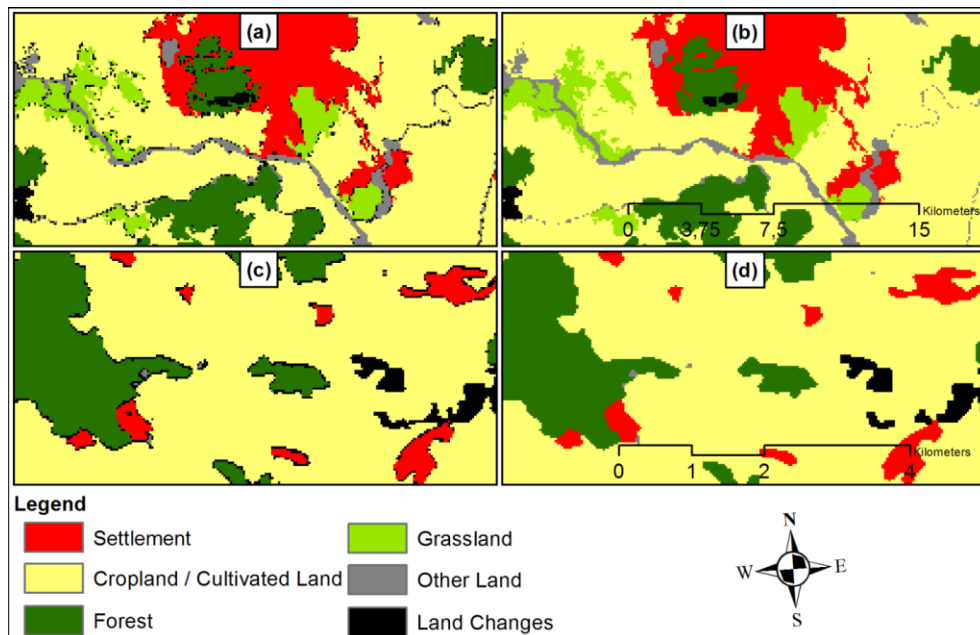

**Figure S1:** Results of the shift correction. Indian land cover data before the shift correction (a) and after (b). Globeland30 data before the shift correction (c) and after (d).

### **3 Application of empirically derived land change dynamics parameters on future simulation scenario**

We first calculated for each year and land system the net change fraction per land cover fraction. Second, we split the net change fraction, into its land conversion components (e.g. from forest to grasslands) by using the change matrix. From these results, we could retrieve all land conversion types, areas gains and losses for net land changes in our scenario. In a third step, we applied our derived gross/net ratios per land system on all net-change land conversion types. This way we could calculate land conversions, area gains and loss for gross land changes in our chosen scenario (see figure 4 - step 2, right panel).

### **4 Using regional averages for the semi-natural grassland system**

The semi-natural grassland systems occurred in the Tundra and in the Sahel zone. While the Tundra is characterized by almost no human influence (very low change rates), parts of the Sahel zone are subject to shifting cultivation (very high change rates). Averaging our empirical data for this land system globally led to high change rates in the Tundra areas and dampened the change rates for the Sahel zone. Therefore, we separated the two regions from each other. We used only empirical data of Tundra areas to describe the semi-natural grassland system in the Tundra, while we only used empirical data of the Sahel zone to describe the semi-natural grassland system in the Sahel zone.

## 5 Spatial coverage of data set per land system

**Table S7:** Spatial coverage of each data set per land system (in 1000km<sup>2</sup>, relative contributions to each land system are indicated in bold)

| Land system code     | LS0           | LS1           | LS2            | LS3           | LS4                  | LS5           | LS6            | LS7           | LS8             | LS9             | LS10          | LS11           | LS12            | LS13           | LS14            | LS15           | LS16                | LS17           | LS18           | LS19          | LS20           | LS21           | LS22            | LS23           |
|----------------------|---------------|---------------|----------------|---------------|----------------------|---------------|----------------|---------------|-----------------|-----------------|---------------|----------------|-----------------|----------------|-----------------|----------------|---------------------|----------------|----------------|---------------|----------------|----------------|-----------------|----------------|
| Dataset              |               |               |                |               |                      |               |                |               |                 |                 |               |                |                 |                |                 |                |                     |                |                |               |                |                |                 |                |
| CLC 00/06            | 42,47<br>2,9% | 3,24<br>0,2%  | 367,21<br>6,9% | 28,32<br>2,2% | 677,47<br>10,2%      | 58,33<br>4,0% | 101,55<br>6,1% | 59,95<br>3,8% | 262,67<br>7,7%  | 191,57<br>7,5%  | 18,94<br>0,8% | 201,64<br>5,1% | 377,24<br>9,1%  | 175,71<br>1,3% | 855,83<br>4,5%  | 866,63<br>4,0% | 217,54<br>1,8%      | 110,85<br>5,1% | 375,60<br>3,1% | 88,37<br>6,6% | 56,26<br>0,4%  | 47,53<br>0,2%  | 422,11<br>12,1% | 102,9<br>9,8%  |
| CLC 06/12            | 42,47<br>2,9% | 3,24<br>0,3%  | 246,54<br>4,6% | 28,32<br>2,2% | 677,46<br>10,2%      | 58,33<br>4,0% | 101,55<br>6,1% | 59,95<br>3,8% | 262,67<br>7,7%  | 191,56<br>7,5%  | 18,94<br>0,8% | 201,63<br>5,1% | 377,23<br>9,1%  | 175,70<br>1,3% | 707,11<br>3,8%  | 738,06<br>3,4% | 217,54<br>1,8%      | 110,85<br>5,1% | 375,60<br>3,1% | 88,37<br>6,6% | 56,26<br>0,4%  | 47,53<br>0,2%  | 422,10<br>12,1% | 102,9<br>9,8%  |
| NLCD 01/06           | 0,00<br>0,0%  | n/a           | 345,70<br>6,5% | 4,19<br>0,3%  | 1048,4<br>3<br>15,8% | 26,05<br>1,8% | 10,64<br>0,6%  | 13,01<br>0,8% | 355,54<br>10,5% | 406,47<br>15,9% | 0,00<br>0,0%  | 35,42<br>0,9%  | 596,39<br>14,3% | 365,82<br>2,8% | 1192,73<br>6,3% | 634,24<br>3,0% | 1018,2<br>0<br>8,4% | 9,43<br>0,4%   | 427,78<br>3,5% | 3,34<br>0,2%  | 294,11<br>2,3% | 573,08<br>3,0% | 258,88<br>7,4%  | 136,8<br>13,1% |
| NLCD 06/11           | 0,00<br>0,0%  | n/a           | 345,70<br>6,5% | 4,19<br>0,3%  | 1048,4<br>3<br>15,8% | 26,05<br>1,8% | 9,29<br>0,6%   | 13,01<br>0,8% | 355,54<br>10,5% | 434,29<br>17,0% | 0,00<br>0,0%  | 35,42<br>0,9%  | 596,39<br>14,3% | 365,82<br>2,8% | 1192,32<br>6,3% | 634,24<br>3,0% | 1018,2<br>0<br>8,4% | 9,43<br>0,4%   | 427,78<br>3,5% | 3,34<br>0,2%  | 294,11<br>2,3% | 573,08<br>3,0% | 258,88<br>7,4%  | 136,8<br>13,1% |
| RCMRD Botswana 00/10 | n/a           | n/a           | n/a            | n/a           | n/a                  | n/a           | n/a            | 2,89<br>0,2%  | n/a             | n/a             | 0,00<br>0,0%  | n/a            | n/a             | n/a            | 0,00<br>0,0%    | 40,68<br>0,2%  | 158,59<br>1,3%      | 22,08<br>1,0%  | 309,81<br>2,6% | 0,09<br>0,0%  | 37,69<br>0,3%  | 7,47<br>0,0%   | 1,30<br>0,0%    | 0,17<br>0,0%   |
| RCMRD Ethiopia 03/08 | 3,43<br>0,2%  | 4,02<br>0,3%  | 1,37<br>0,0%   | n/a           | n/a                  | n/a           | 74,76<br>4,5%  | 62,09<br>3,9% | 20,60<br>0,6%   | n/a             | 15,77<br>0,7% | 14,37<br>0,4%  | n/a             | 12,75<br>0,1%  | 64,33<br>0,3%   | 223,08<br>1,0% | 172,62<br>1,4%      | 22,08<br>1,0%  | 309,81<br>2,6% | 0,09<br>0,0%  | 37,69<br>0,3%  | 7,47<br>0,0%   | 1,30<br>0,0%    | 0,17<br>0,0%   |
| RCMRD Lesotho 00/14  | 0,34<br>0,0%  | 0,14<br>0,0%  | n/a            | n/a           | n/a                  | n/a           | 0,26<br>0,0%   | 2,77<br>0,2%  | 0,48<br>0,0%    | n/a             | 0,94<br>0,0%  | n/a            | n/a             | n/a            | 0,00<br>0,0%    | 6,32<br>0,0%   | 6,18<br>0,1%        | n/a            | 11,28<br>0,1%  | 1,53<br>0,1%  | n/a            | n/a            | 0,31<br>0,0%    | n/a            |
| RCMRD Malawi 00/10   | 1,83<br>0,1%  | n/a           | n/a            | n/a           | n/a                  | n/a           | n/a            | 7,74<br>0,5%  | n/a             | n/a             | 13,50<br>0,6% | n/a            | n/a             | 0,00<br>0,0%   | 3,20<br>0,0%    | 39,45<br>0,2%  | 0,00<br>0,0%        | 0,43<br>0,0%   | 26,68<br>0,2%  | 2,53<br>0,2%  | 0,00<br>0,0%   | n/a            | 0,17<br>0,0%    | 0,09<br>0,0%   |
| RCMRD Namibia 00/10  | n/a           | n/a           | n/a            | n/a           | n/a                  | n/a           | 0,00<br>0,0%   | n/a           | n/a             | n/a             | n/a           | n/a            | n/a             | n/a            | n/a             | 9,81<br>0,0%   | 276,11<br>2,3%      | 0,00<br>0,0%   | 168,14<br>1,4% | 0,00<br>0,0%  | 124,89<br>1,0% | 245,07<br>1,3% | 0,74<br>0,0%    | n/a            |
| RCMRD Rwanda 00/10   | 2,70<br>0,2%  | 2,34<br>0,2%  | n/a            | n/a           | n/a                  | n/a           | 0,96<br>0,1%   | 1,56<br>0,1%  | n/a             | n/a             | 8,65<br>0,4%  | n/a            | n/a             | 0,00<br>0,0%   | 1,86<br>0,0%    | 4,41<br>0,0%   | n/a                 | 0,00<br>0,0%   | 2,06<br>0,0%   | 0,00<br>0,0%  | n/a            | n/a            | 0,20<br>0,0%    | 0,13<br>0,0%   |
| RCMRD Tanzania 00/10 | 0,00<br>0,0%  | 0,11<br>0,0%  | n/a            | n/a           | n/a                  | n/a           | 0,00<br>0,0%   | 5,55<br>0,4%  | n/a             | n/a             | 26,82<br>1,2% | 0,00<br>0,0%   | n/a             | n/a            | 49,79<br>0,3%   | 490,72<br>2,3% | 0,00<br>0,0%        | 8,09<br>0,4%   | 212,64<br>1,8% | 61,07<br>4,6% | 0,00<br>0,0%   | 0,00<br>0,0%   | 3,05<br>0,1%    | 0,25<br>0,0%   |
| RCMRD Uganda 00/14   | 56,86<br>3,9% | 14,91<br>1,2% | n/a            | n/a           | n/a                  | n/a           | 2,19<br>0,1%   | 13,65<br>0,9% | 0,00<br>0,0%    | n/a             | 52,50<br>2,3% | 0,00<br>0,0%   | n/a             | 2,94<br>0,0%   | 17,46<br>0,1%   | 37,24<br>0,2%  | 0,51<br>0,0%        | 1,11<br>0,1%   | 7,55<br>0,1%   | 0,90<br>0,1%  | 0,00<br>0,0%   | n/a            | 1,29<br>0,0%    | 0,17<br>0,0%   |
| RCMRD                | 0,00          | n/a           | n/a            | n/a           | n/a                  | n/a           | n/a            | 1,38          | n/a             | n/a             | 30,00         | n/a            | n/a             | 0,00           | 108,95          | 461,81         | 1,08                | 1,65           | 143,72         | 0,03          | 0,00           | 0,09           | 2,61            | 0,43           |

|                                      |                         |                        |                         |                        |                         |                        |                         |                         |                         |                         |                         |                         |                         |                          |                          |                          |                         |                         |                         |                         |                          |                          |                         |                        |
|--------------------------------------|-------------------------|------------------------|-------------------------|------------------------|-------------------------|------------------------|-------------------------|-------------------------|-------------------------|-------------------------|-------------------------|-------------------------|-------------------------|--------------------------|--------------------------|--------------------------|-------------------------|-------------------------|-------------------------|-------------------------|--------------------------|--------------------------|-------------------------|------------------------|
| <b>Zambia<br/>00/10</b>              | <b>0,0%</b>             |                        |                         |                        |                         |                        |                         | <b>0,1%</b>             |                         |                         | <b>1,3%</b>             |                         |                         | <b>0,0%</b>              | <b>0,6%</b>              | <b>2,1%</b>              | <b>0,0%</b>             | <b>0,1%</b>             | <b>1,2%</b>             | <b>0,0%</b>             | <b>0,0%</b>              | <b>0,0%</b>              | <b>0,1%</b>             | <b>0,0%</b>            |
| <b>MoFor<br/>Indonesia<br/>00/03</b> | 26,14<br><b>1,8%</b>    | 0,28<br><b>0,0%</b>    | 136,43<br><b>2,6%</b>   | 3,76<br><b>0,3%</b>    | 106,22<br><b>1,6%</b>   | 8,91<br><b>0,6%</b>    | 1,20<br><b>0,1%</b>     | 2,72<br><b>0,2%</b>     | 12,65<br><b>0,4%</b>    | 5,99<br><b>0,2%</b>     | 113,75<br><b>5,1%</b>   | 359,84<br><b>9,1%</b>   | 139,35<br><b>3,3%</b>   | 551,05<br><b>4,2%</b>    | 229,20<br><b>1,2%</b>    | 49,54<br><b>0,2%</b>     | 0,00<br><b>0,0%</b>     | 4,03<br><b>0,2%</b>     | 8,33<br><b>0,1%</b>     | n/a                     | n/a                      | n/a                      | 37,37<br><b>1,1%</b>    | 9,97<br><b>1,0%</b>    |
| <b>MoFor<br/>Indonesia<br/>03/06</b> | 26,14<br><b>1,7%</b>    | n/a                    | 136,52<br><b>2,6%</b>   | 3,76<br><b>0,3%</b>    | 106,22<br><b>1,6%</b>   | 8,91<br><b>0,6%</b>    | 1,20<br><b>0,1%</b>     | 2,72<br><b>0,2%</b>     | 12,65<br><b>0,4%</b>    | 5,99<br><b>0,2%</b>     | 113,75<br><b>5,2%</b>   | 359,88<br><b>9,1%</b>   | 139,35<br><b>3,3%</b>   | 551,06<br><b>4,2%</b>    | 229,20<br><b>1,2%</b>    | 49,54<br><b>0,2%</b>     | n/a                     | 4,03<br><b>0,2%</b>     | 8,33<br><b>0,1%</b>     | 0,54<br><b>0,0%</b>     | n/a                      | 0,65<br><b>0,0%</b>      | 37,37<br><b>1,1%</b>    | 9,97<br><b>1,0%</b>    |
| <b>MoFor<br/>Indonesia<br/>06/09</b> | 26,14<br><b>1,8%</b>    | 0,28<br><b>0,0%</b>    | 136,56<br><b>2,6%</b>   | 3,76<br><b>0,0%</b>    | 106,21<br><b>1,6%</b>   | 8,91<br><b>0,6%</b>    | 1,20<br><b>0,1%</b>     | 2,72<br><b>0,2%</b>     | 12,65<br><b>0,4%</b>    | 5,99<br><b>0,2%</b>     | 113,75<br><b>5,1%</b>   | 359,89<br><b>9,1%</b>   | 139,35<br><b>3,3%</b>   | 551,02<br><b>4,2%</b>    | 229,24<br><b>1,2%</b>    | 49,55<br><b>0,2%</b>     | 0,19<br><b>0,0%</b>     | 4,03<br><b>0,2%</b>     | 8,33<br><b>0,1%</b>     | 0,54<br><b>0,0%</b>     | 0,00<br><b>0,0%</b>      | 0,65<br><b>0,0%</b>      | 37,37<br><b>1,1%</b>    | 9,97<br><b>1,0%</b>    |
| <b>India LC<br/>95/05</b>            | 125,63<br><b>8,6%</b>   | 526,10<br><b>40,9%</b> | 83,69<br><b>1,6%</b>    | 463,04<br><b>35,7%</b> | 94,42<br><b>1,4%</b>    | 444,33<br><b>30,2%</b> | 298,60<br><b>18,1%</b>  | 34,59<br><b>2,2%</b>    | 21,90<br><b>0,6%</b>    | 14,20<br><b>0,6%</b>    | 85,86<br><b>3,8%</b>    | 118,74<br><b>3,0%</b>   | 58,16<br><b>1,4%</b>    | 49,09<br><b>0,4%</b>     | 153,02<br><b>0,8%</b>    | 150,16<br><b>0,7%</b>    | 29,58<br><b>0,2%</b>    | 2,61<br><b>0,1%</b>     | 24,45<br><b>0,2%</b>    | 28,28<br><b>2,1%</b>    | 173,51<br><b>1,4%</b>    | 161,48<br><b>0,8%</b>    | 108,01<br><b>3,1%</b>   | 20,12<br><b>1,9%</b>   |
| <b>Globeland3<br/>0<br/>00/10</b>    | 1151,38<br><b>76,2%</b> | 728,04<br><b>56,7%</b> | 3505,98<br><b>66,1%</b> | 763,83<br><b>58,6%</b> | 2781,82<br><b>41,9%</b> | 829,27<br><b>56,4%</b> | 1049,63<br><b>63,3%</b> | 1301,34<br><b>81,9%</b> | 2073,02<br><b>61,1%</b> | 1302,31<br><b>50,9%</b> | 1623,86<br><b>72,3%</b> | 2264,99<br><b>57,3%</b> | 1741,12<br><b>41,8%</b> | 10342,33<br><b>78,7%</b> | 13810,34<br><b>73,3%</b> | 16995,64<br><b>79,1%</b> | 8985,99<br><b>74,2%</b> | 1877,55<br><b>85,8%</b> | 9288,05<br><b>76,5%</b> | 1056,72<br><b>79,1%</b> | 11595,31<br><b>91,5%</b> | 17634,36<br><b>91,4%</b> | 1897,89<br><b>54,4%</b> | 517,46<br><b>49,3%</b> |
