# Supplementary material for: A global assessment of gross and net land change dynamics for current conditions and future scenarios
Source: Copernicus journal article supplement (doi:10.5194/esd-2017-121), 2017-12-15
Supplement: Supplementary file 1 [file Supplement S2 - Final.xlsx]

## Sheet: Average
24 Land Systems classification		WGT_AVG (temporarely normalized)	WGT_AVG	WGT_AVG	WGT_AVG	WGT_AVG
No PP LS Code	Land system name	settlement	cropland	forest	grassland	other land	all classes		Total area LS Urb.	Total area LS Crop	Total area LS Forest	Total area LS Grassland	Total area LS Other
0	Cropland; extensive with few livestock	143.476	149.028	128.218	199.544	130.771			1.45552e+12	1.51165e+12	1.51165e+12	1.51208e+12	1.51208e+12
1	Cropland; extensive with bovines, goats & sheep	113.27	127.573	127.031	135.787	130.099			1.28478e+12	1.28507e+12	1.28507e+12	1.28507e+12	1.28507e+12
2	Cropland; medium intensive with few livestock	136.15	161.426	131.321	162.54	130.643			5.30571e+12	5.30571e+12	5.30571e+12	5.30571e+12	5.30571e+12
3	Cropland; medium intensive with bovines, goats & sheep	113.782	182.267	139.035	144.891	150.496			1295657770900	1303173393700	1303173393700	1303173393700	1303173393700
4	Cropland; intensive with few livestock	125.365	177.31	153.562	180.789	148.706			6646687676500	6646687676500	6646687676500	6646687676500	6646687676500
5	Cropland; intensive with bovines, goats & sheep	118.253	131.985	129.018	123.299	124.639			1469076099700	1469076099700	1469076099700	1469076099700	1469076099700
6	Mosaic cropland and grassland with bovines, goats & sheep	118.325	142.3	125.182	145.319	129.363			1.65278e+12	1.65927e+12	1.65799e+12	1.65927e+12	1.65808e+12
7	Mosaic cropland (extensive) and grassland with few livestock	126.545	285.332	185.975	211.405	126.256			1.58376e+12	1.58796e+12	1.58921e+12	1.58921e+12	1.58376e+12
8	Mosaic cropland (medium intensive) and grassland with few livestock	113.68	139.941	142.924	153.839	127.724			3.39038e+12	3.39045e+12	3.39045e+12	3.39045e+12	3.39045e+12
9	Mosaic cropland (intensive) and grassland with few livestock	114.719	144.403	145.616	150.71	133.838			2558373090200	2558373090200	2558373090200	2558373090200	2558373090200
10	Mosaic cropland (extensive) and forest with few livestock	116.851	167.595	135.933	134.481	126.354			2.24567e+12	2.18553e+12	2.24637e+12	2.24706e+12	2.24569e+12
11	Mosaic cropland (medium intensive) and forest with few livestock	116.001	130.575	136.713	155.696	128.395			3.95183e+12	3.9548e+12	3.9548e+12	3.9548e+12	3.9548e+12
12	Mosaic cropland (intensive) and forest with few livestock	113.904	146.707	150.256	194.376	165.067			4164587087400	4164587087400	4164587087400	4164587087400	4164587087400
13	Dense forest	119.45	131.73	145.87	159.545	151.874			1.31433e+13	1.31441e+13	1.31441e+13	1.31441e+13	1.31436e+13
14	Open forest with few livestock	123.251	150.116	167.575	160.713	137.868			1.88464e+13	1.88465e+13	1.88467e+13	1.88467e+13	1.88448e+13
15	Mosaic grassland and forest	123.631	155.753	159.922	211.801	135.447			2.14855e+13	2.14855e+13	2.14855e+13	2.14855e+13	2.14855e+13
16	Mosaic grassland and bare	122.145	135.99	186.395	208.521	127.981			1.21023e+13	1.21072e+13	1.21076e+13	1.21076e+13	1.21072e+13
17	Natural grassland	121.761	116.264	225.822	179.18	126.932			2.18825e+12	2.18928e+12	2.18928e+12	2.18928e+12	2.18911e+12
18	Grassland with few livestock	123.719	144.046	148.461	152.108	128.039			1.2138e+13	1.2138e+13	1.2138e+13	1.2138e+13	1.2138e+13
19	Grassland with bovines, goats and sheep	127.315	142.596	127.785	138.413	121.148			1.33466e+12	1.33591e+12	1.336e+12	1.33546e+12	1.33511e+12
20	Bare	119.713	119.349	140.135	143.863	157.32			1.26698e+13	1.26762e+13	1.26767e+13	1.26767e+13	1.26762e+13
21	Bare with few livestock	125.568	133.325	184.974	148.505	148.691			1.92972e+13	1.9298e+13	1.92993e+13	1.92993e+13	1.92979e+13
22	Peri-urban & villages	125.907	135.638	134.543	138.746	139.126			3.49093e+12	3.49113e+12	3.49113e+12	3.49113e+12	3.49073e+12
23	Urban	119.056	126.389	133.249	164.539	146.627			1.04876e+12	1.04851e+12	1.04876e+12	1.04876e+12	1.04815e+12
	Mosaic land systems	118.422	160.955	152.102	174.017	133.38	147.775	SUM	1.5475e+14	1.54783e+14	1.54846e+14	1.54848e+14	1.54834e+14
	Homogeneous land systems	123.736	141.936	147.773	155.497	138.199	141.428											Net change fraction of total change per class
LS00	Conversion Matrix (in %)	S (06)	C (06)	F (06)	P (06)	O (06)	All (06)	LS00	Change Matrix (in %)	S (06)	C (06)	F (06)	P (06)	O (06)	All (06)			MED (new) normalized
	S (00)	1.27095	0.024897	0.00339239	0.00959202	0.00130077	1.31013		S (00)	0	0.705777	0.0996044	0.190145	0.0352202	1.03075		S	0.979602
	C (00)	0.0968407	38.342	0.481014	1.62294	0.137802	40.6806		C (00)	2.72641	0	4.78389	12.8042	1.72849	22.043		C	0.92807
	F (00)	0.0172624	0.697786	18.4951	1.03484	0.0441057	20.2891		F (00)	0.451345	7.59731	0	10.7509	0.809921	19.6094		F	1.53434
	P (00)	0.0515937	3.13644	1.78001	29.2191	0.289412	34.4766		P (00)	0.891483	29.3114	16.2868	0	3.16649	49.6561		P	1.08395
	O (00)	0.00380253	0.148078	0.0530462	0.278922	2.7598	3.24364		O (00)	0.171589	2.62982	0.831642	4.02759	0	7.66064		O	2.90791
	All (00)	1.44044	42.3492	20.8125	32.1654	3.23242	100		All (00)	4.24082	40.2443	22.002	27.7728	5.74012	100
							100								100
LS01	Conversion Matrix (in %)	S (06)	C (06)	F (06)	P (06)	O (06)	All (06)	LS01	Change Matrix (in %)	S (06)	C (06)	F (06)	P (06)	O (06)	All (06)
	S (00)	0.926703	0.00795937	0.0028166	0.00497369	0.000747132	0.9432		S (00)	0	0.44626	0.0588143	0.134309	0.0255691	0.664953		S	1.29045
	C (00)	0.0730096	61.9561	0.239654	1.26806	0.156048	63.6929		C (00)	4.06246	0	2.41469	14.0134	3.07143	23.562		C	0.277554
	F (00)	0.00664138	0.40301	12.1516	0.365901	0.038486	12.9656		F (00)	0.23336	6.8693	0	4.08463	0.541868	11.7292		F	0.746508
	P (00)	0.0222427	2.77538	0.327999	15.9215	0.190175	19.2373		P (00)	0.66482	39.3917	3.65774	0	3.19906	46.9133		P	0.931295
	O (00)	0.0028262	0.285414	0.0195568	0.205163	2.64802	3.16098		O (00)	0.0671318	9.41315	1.02121	6.62915	0	17.1306		O	1.58854
	All (00)	1.03142	65.4279	12.7416	17.7656	3.03348	100		All (00)	5.02777	56.1204	7.15246	24.8615	6.83793	100
							100								100
LS02	Conversion Matrix (in %)	S (06)	C (06)	F (06)	P (06)	O (06)	All (06)	LS02	Change Matrix (in %)	S (06)	C (06)	F (06)	P (06)	O (06)	All (06)
	S (00)	2.5601	0.0583805	0.00859282	0.0102494	0.0013552	2.63868		S (00)	0	1.92918	0.570371	0.335499	0.0730045	2.90805		S	0.775881
	C (00)	0.0890279	57.7137	0.233809	0.445377	0.0514724	58.5334		C (00)	4.60911	0	8.61872	13.5072	2.26797	29.003		C	0.138668
	F (00)	0.0148223	0.278151	14.5013	0.271908	0.0351858	15.1013		F (00)	1.05387	8.57084	0	8.54911	1.89666	20.0705		F	0.706692
	P (00)	0.0324195	0.721469	0.362545	20.2409	0.100137	21.4575		P (00)	1.67735	23.806	9.07777	0	3.81413	38.3753		P	0.692251
	O (00)	0.00263841	0.0586122	0.028207	0.131852	2.04781	2.26912		O (00)	0.157996	2.40655	1.41208	5.66659	0	9.64322		O	1.87892
	All (00)	2.69901	58.8304	15.1344	21.1003	2.23596	100		All (00)	7.49833	36.7126	19.6789	28.0584	8.05176	100
							100								100
LS03	Conversion Matrix (in %)	S (06)	C (06)	F (06)	P (06)	O (06)	All (06)	LS03	Change Matrix (in %)	S (06)	C (06)	F (06)	P (06)	O (06)	All (06)
	S (00)	2.05203	0.0269659	0.00399716	0.00398645	0.000806309	2.08779		S (00)	0	1.54962	0.244274	0.184183	0.0485165	2.0266		S	0.794215
	C (00)	0.104585	70.7091	0.0988969	0.372739	0.106439	71.3918		C (00)	6.34435	0	5.32447	12.3056	4.5894	28.5638		C	0.0762275
	F (00)	0.0115744	0.13365	10.3194	0.110514	0.0117022	10.5869		F (00)	0.482289	5.2154	0	2.91387	0.838311	9.44987		F	0.568108
	P (00)	0.0139675	0.612554	0.262632	11.245	0.103335	12.2375		P (00)	0.955538	22.123	13.6074	0	4.61987	41.3058		P	0.500473
	O (00)	0.00249703	0.237711	0.0277118	0.147393	3.28075	3.69606		O (00)	0.11656	11.115	1.48093	5.94137	0	18.6539		O	0.824526
	All (00)	2.18466	71.72	10.7127	11.8796	3.50303	100		All (00)	7.89874	40.003	20.6571	21.345	10.0961	100
							100								100
LS04	Conversion Matrix (in %)	S (06)	C (06)	F (06)	P (06)	O (06)	All (06)	LS04	Change Matrix (in %)	S (06)	C (06)	F (06)	P (06)	O (06)	All (06)
	S (00)	4.5357	0.0338363	0.00606851	0.00751906	0.0028242	4.58595		S (00)	0	1.69082	0.423704	0.495932	0.231255	2.84171		S	0.643159
	C (00)	0.165624	60.3791	0.126914	0.300294	0.0639425	61.0358		C (00)	13.9047	0	6.28453	13.4125	2.97221	36.5739		C	0.080727
	F (00)	0.017048	0.165172	15.2147	0.192954	0.0244488	15.6143		F (00)	1.74193	6.15508	0	10.0533	1.34998	19.3003		F	0.364447
	P (00)	0.0462258	0.379878	0.233391	15.8162	0.0755793	16.5513		P (00)	4.28411	16.1924	9.78868	0	4.05874	34.3239		P	0.662677
	O (00)	0.00426723	0.0659549	0.0268392	0.0757488	2.03984	2.21265		O (00)	0.242916	2.19561	1.10645	3.41516	0	6.96014		O	1.29247
	All (00)	4.76887	61.0239	15.6079	16.3927	2.20664	100		All (00)	20.1737	26.2339	17.6034	27.3769	8.61218	100
							100								100
LS05	Conversion Matrix (in %)	S (06)	C (06)	F (06)	P (06)	O (06)	All (06)	LS05	Change Matrix (in %)	S (06)	C (06)	F (06)	P (06)	O (06)	All (06)
	S (00)	2.95711	0.0566485	0.00437482	0.0041911	0.00245097	3.02478		S (00)	0	2.19203	0.25519	0.246561	0.101343	2.79513		S	1.18384
	C (00)	0.365174	72.3475	0.147905	0.805261	0.165241	73.8311		C (00)	10.063	0	7.1522	13.941	5.26231	36.4185		C	0.106652
	F (00)	0.0197257	0.165816	8.15473	0.0660105	0.0155384	8.42182		F (00)	1.1066	6.95849	0	2.6714	0.722335	11.4588		F	0.426502
	P (00)	0.0403712	1.36522	0.188752	9.81956	0.136114	11.55		P (00)	1.56724	22.644	6.1446	0	6.37436	36.7302		P	1.29634
	O (00)	0.00720907	0.300862	0.0343956	0.135957	2.6939	3.17233		O (00)	0.185758	7.10324	1.39146	3.91695	0	12.5974		O	1.71668
	All (00)	3.38959	74.236	8.53016	10.831	3.01325	100		All (00)	12.9226	38.8977	14.9434	20.7759	12.4603	100
							100								100
LS06	Conversion Matrix (in %)	S (06)	C (06)	F (06)	P (06)	O (06)	All (06)	LS06	Change Matrix (in %)	S (06)	C (06)	F (06)	P (06)	O (06)	All (06)
	S (00)	1.84165	0.0366508	0.00243693	0.00604356	0.00261498	1.8894		S (00)	0	1.07648	0.111056	0.212968	0.193392	1.5939		S	1.27949
	C (00)	0.138382	46.4949	0.362708	1.75288	0.148521	48.8974		C (00)	5.76654	0	3.53074	16.1018	3.00211	28.4012		C	0.58073
	F (00)	0.0123549	0.329973	13.6253	0.407384	0.0337954	14.4088		F (00)	0.771616	4.40344	0	4.53452	1.05549	10.7651		F	2.70106
	P (00)	0.0463536	2.63648	0.705955	26.4755	0.429711	30.294		P (00)	2.65878	26.9594	11.1745	0	6.31137	47.1041		P	1.06099
	O (00)	0.00656001	0.248445	0.0453609	0.412403	3.79764	4.51041		O (00)	0.216442	4.41779	1.34192	6.0872	0	12.0634		O	2.97262
	All (00)	2.0453	49.7465	14.7418	29.0542	4.41229	100		All (00)	9.41338	36.8571	16.1582	26.9365	10.5624	99.9276
							100								99.9276
LS07	Conversion Matrix (in %)	S (06)	C (06)	F (06)	P (06)	O (06)	All (06)	LS07	Change Matrix (in %)	S (06)	C (06)	F (06)	P (06)	O (06)	All (06)
	S (00)	0.920677	0.0106393	0.00175793	0.0114055	0.000734153	0.945214		S (00)	0	0.213651	0.0286366	0.281161	0.0226978	0.546146		S	1.45735
	C (00)	0.0411341	25.254	0.4173	2.08739	0.0940628	27.8939		C (00)	1.82624	0	2.75166	16.3872	1.08333	22.0485		C	1.4655
	F (00)	0.0142914	0.506737	10.3547	0.938475	0.032146	11.8464		F (00)	0.516257	4.34716	0	8.85521	0.424843	14.1435		F	3.54415
	P (00)	0.0635908	3.29006	1.61774	48.549	0.558675	54.0791		P (00)	1.48117	28.2796	15.5733	0	4.62078	49.9548		P	0.732155
	O (00)	0.00250516	0.139548	0.0349667	0.655733	4.40267	5.23543		O (00)	0.308575	2.43039	0.699992	9.86808	0	13.307		O	3.79159
	All (00)	1.0422	29.201	12.4265	52.242	5.08829	100		All (00)	4.13224	35.2708	19.0536	35.3917	6.15165	100
							100								100
LS08	Conversion Matrix (in %)	S (06)	C (06)	F (06)	P (06)	O (06)	All (06)	LS08	Change Matrix (in %)	S (06)	C (06)	F (06)	P (06)	O (06)	All (06)
	S (00)	2.27188	0.0321365	0.00356149	0.0121223	0.00156397	2.32126		S (00)	0	0.82064	0.137573	0.353854	0.0680597	1.38013		S	0.936306
	C (00)	0.0836701	40.654	0.199986	0.539403	0.0504094	41.5275		C (00)	4.64117	0	5.18731	12.5471	2.23722	24.6128		C	0.229977
	F (00)	0.0138129	0.214085	13.9394	0.29794	0.0275675	14.4928		F (00)	0.999369	4.71382	0	6.87945	1.37247	13.9651		F	0.726632
	P (00)	0.0402615	0.972346	0.515313	36.065	0.222811	37.8158		P (00)	2.42865	23.9953	11.0586	0	8.26327	45.7458		P	0.438795
	O (00)	0.00248333	0.0647356	0.0273675	0.379474	3.36866	3.84272		O (00)	0.156888	1.77562	1.57277	10.7909	0	14.2962		O	1.63493
	All (00)	2.41211	41.9373	14.6856	37.294	3.67101	100		All (00)	8.22608	31.3054	17.9562	30.5713	11.941	100
							100								100
LS09	Conversion Matrix (in %)	S (06)	C (06)	F (06)	P (06)	O (06)	All (06)	LS09	Change Matrix (in %)	S (06)	C (06)	F (06)	P (06)	O (06)	All (06)
	S (00)	5.0303	0.0419832	0.00801398	0.0134867	0.00312569	5.09691		S (00)	0	1.32591	0.368279	0.548479	0.183461	2.42613		S	0.630503
	C (00)	0.207098	42.4562	0.179639	0.510022	0.0813121	43.4342		C (00)	10.203	0	5.07675	13.0205	2.13872	30.439		C	0.174132
	F (00)	0.0287807	0.215209	18.5401	0.323355	0.0317143	19.1392		F (00)	2.10375	4.57413	0	13.0058	1.59342	21.2771		F	0.600502
	P (00)	0.0768376	0.70249	0.496551	27.5246	0.170318	28.9708		P (00)	5.13629	15.2346	12.0837	0	4.29595	36.7506		P	0.629237
	O (00)	0.00908944	0.125724	0.0323875	0.228819	2.96286	3.35888		O (00)	0.280627	2.49504	0.926571	5.40495	0	9.10719		O	1.39486
	All (00)	5.3521	43.5416	19.2567	28.6003	3.24933	100		All (00)	17.7237	23.6297	18.4553	31.9797	8.21155	100
							100								100
LS10	Conversion Matrix (in %)	S (06)	C (06)	F (06)	P (06)	O (06)	All (06)	LS10	Change Matrix (in %)	S (06)	C (06)	F (06)	P (06)	O (06)	All (06)
	S (00)	0.511577	0.0048161	0.00390823	0.00686447	0.000224529	0.527391		S (00)	0	0.185935	0.0830336	0.120938	0.00398049	0.393887		S	1.22878
	C (00)	0.0240738	14.7951	0.577456	1.09615	0.0297776	16.5225		C (00)	0.846722	0	4.38078	8.60918	0.659627	14.4963		C	2.30302
	F (00)	0.0164921	0.957687	41.4834	1.85736	0.0448415	44.3598		F (00)	0.295872	10.4743	0	18.2504	1.1947	30.2152		F	1.37011
	P (00)	0.0243371	2.04071	4.35492	30.3922	0.218269	37.0304		P (00)	0.400574	16.1809	32.1623	0	3.70367	52.4475		P	1.38154
	O (00)	0.000733617	0.0454826	0.0563025	0.0903893	1.36695	1.55986		O (00)	0.011978	0.599941	0.809666	1.0255	0	2.44708		O	2.74331
	All (00)	0.577214	17.8438	46.476	33.443	1.66007	100		All (00)	1.55515	27.4411	37.4358	28.006	5.56198	100
							100								100
LS11	Conversion Matrix (in %)	S (06)	C (06)	F (06)	P (06)	O (06)	All (06)	LS11	Change Matrix (in %)	S (06)	C (06)	F (06)	P (06)	O (06)	All (06)
	S (00)	1.39578	0.0295961	0.00614713	0.00708076	0.00102098	1.43962		S (00)	0	0.901695	0.232421	0.187999	0.0367824	1.3589		S	2.27
	C (00)	0.052835	28.6009	0.291107	0.286065	0.0303161	29.2612		C (00)	2.37568	0	8.00483	6.33922	0.984493	17.7042		C	0.407297
	F (00)	0.0205965	0.516232	44.1337	0.759921	0.0838614	45.5143		F (00)	1.06505	13.7285	0	19.9036	3.94197	38.6391		F	0.564993
	P (00)	0.0240207	0.654491	0.844652	19.6847	0.113928	21.3218		P (00)	1.05391	14.2104	17.1316	0	3.68302	36.079		P	1.00055
	O (00)	0.00534521	0.0331411	0.055206	0.0992936	2.27011	2.4631		O (00)	0.154911	0.897327	2.80476	2.36182	0	6.21881		O	2.35019
	All (00)	1.49857	29.8344	45.3308	20.837	2.49924	100		All (00)	4.64955	29.738	28.1736	28.7926	8.64627	100
							100								100
LS12	Conversion Matrix (in %)	S (06)	C (06)	F (06)	P (06)	O (06)	All (06)	LS12	Change Matrix (in %)	S (06)	C (06)	F (06)	P (06)	O (06)	All (06)
	S (00)	4.10738	0.0218741	0.00915418	0.00995625	0.00323923	4.1516		S (00)	0	0.981297	0.506135	0.444502	0.317107	2.24904		S	1.32456
	C (00)	0.0921171	31.1132	0.196415	0.212762	0.0539468	31.6684		C (00)	6.27662	0	7.03163	8.69006	1.87541	23.8737		C	0.182656
	F (00)	0.0347758	0.287633	40.0226	0.588229	0.0544432	40.9877		F (00)	2.53079	8.35425	0	21.2058	2.67462	34.7654		F	0.223315
	P (00)	0.0407945	0.304839	0.639538	19.3326	0.0660054	20.3837		P (00)	2.79517	10.5394	17.5268	0	2.40447	33.2658		P	0.699217
	O (00)	0.00432222	0.0489868	0.037186	0.0857549	2.63235	2.8086		O (00)	0.171192	1.36719	1.54724	2.76039	0	5.84602		O	1.38661
	All (00)	4.27939	31.7765	40.9049	20.2293	2.80999	100		All (00)	11.7738	21.2421	26.6118	33.1007	7.2716	100
							100								100
LS13	Conversion Matrix (in %)	S (06)	C (06)	F (06)	P (06)	O (06)	All (06)	LS13	Change Matrix (in %)	S (06)	C (06)	F (06)	P (06)	O (06)	All (06)
	S (00)	0.446577	0.00245889	0.00262735	0.00269132	0.000228553	0.454583		S (00)	0	0.174445	0.11807	0.0835744	0.0191892	0.395279		S	2.08817
	C (00)	0.00441413	3.07846	0.0831583	0.0886467	0.00349528	3.25818		C (00)	0.432863	0	2.3525	2.32135	0.129921	5.23664		C	3.46268
	F (00)	0.0125603	0.304423	78.0386	1.63055	0.0742209	80.0603		F (00)	0.648141	8.31211	0	38.6624	3.10256	50.7252		F	0.129672
	P (00)	0.00734374	0.15185	1.53494	11.7633	0.0662276	13.5237		P (00)	0.359673	4.37452	32.2508	0	1.93154	38.9166		P	2.02117
	O (00)	0.000527204	0.00658008	0.0811453	0.0908178	2.52416	2.70323		O (00)	0.0268302	0.301693	1.86234	2.53547	0	4.72633		O	1.53743
	All (00)	0.471423	3.54377	79.7405	13.576	2.66834	100		All (00)	1.46751	13.1628	36.5837	43.6028	5.18321	100
							100								100
LS14	Conversion Matrix (in %)	S (06)	C (06)	F (06)	P (06)	O (06)	All (06)	LS14	Change Matrix (in %)	S (06)	C (06)	F (06)	P (06)	O (06)	All (06)
	S (00)	1.21819	0.0096958	0.00580977	0.00613735	0.0010375	1.24087		S (00)	0	0.414574	0.280265	0.223911	0.0681035	0.986854		S	1.19854
	C (00)	0.0201108	6.47173	0.166428	0.1722	0.00917735	6.83965		C (00)	1.25817	0	3.57758	3.59255	0.301507	8.72981		C	1.3814
	F (00)	0.0238791	0.348771	61.0854	1.64848	0.0701233	63.1767		F (00)	1.59177	6.46813	0	30.9509	2.55327	41.5641		F	0.281518
	P (00)	0.0197278	0.338275	2.10629	21.8946	0.126441	24.4853		P (00)	1.05258	5.74437	32.8901	0	2.73992	42.427		P	0.839949
	O (00)	0.00221287	0.0117588	0.075742	0.152283	4.01551	4.25751		O (00)	0.0948569	0.3602	1.96243	3.87475	0	6.29224		O	1.05995
	All (00)	1.28412	7.18023	63.4397	23.8737	4.22229	100		All (00)	3.99738	12.9873	38.7104	38.6422	5.6628	100
							100								100
LS15	Conversion Matrix (in %)	S (06)	C (06)	F (06)	P (06)	O (06)	All (06)	LS15	Change Matrix (in %)	S (06)	C (06)	F (06)	P (06)	O (06)	All (06)
	S (00)	0.985364	0.00873447	0.00593384	0.00897138	0.000821681	1.00982		S (00)	0	0.268462	0.229006	0.22916	0.0458453	0.772474		S	1.37027
	C (00)	0.0235685	10.0746	0.311613	0.661794	0.0158502	11.0874		C (00)	1.21463	0	3.60734	6.26153	0.33689	11.4204		C	1.78198
	F (00)	0.0216295	0.617704	36.8879	2.34914	0.0526088	39.929		F (00)	1.17962	6.15001	0	24.8859	1.40602	33.6215		F	1.03939
	P (00)	0.0285721	1.33876	3.56347	38.9493	0.18046	44.0605		P (00)	1.06661	11.4365	33.5422	0	2.55928	48.6045		P	0.670191
	O (00)	0.00216592	0.0277062	0.0810117	0.281744	3.52063	3.91326		O (00)	0.0675964	0.350196	1.42928	3.73404	0	5.58111		O	2.10288
	All (00)	1.0613	12.0675	40.8499	42.2509	3.77037	100		All (00)	3.52845	18.2051	38.8078	35.1106	4.34803	100
							100								100
LS16	Conversion Matrix (in %)	S (06)	C (06)	F (06)	P (06)	O (06)	All (06)	LS16	Change Matrix (in %)	S (06)	C (06)	F (06)	P (06)	O (06)	All (06)
	S (00)	0.666695	0.00507847	0.00060264	0.00960685	0.00125951	0.683242		S (00)	0	0.0806928	0.013077	0.193614	0.0852217	0.372606		S	1.00364
	C (00)	0.014355	6.26451	0.0231453	0.375853	0.0379418	6.71581		C (00)	0.626305	0	0.409987	5.90852	0.752119	7.69693		C	1.46851
	F (00)	0.0023544	0.0310822	9.05224	1.00338	0.0408115	10.1299		F (00)	0.251316	0.532038	0	19.7535	1.25949	21.7963		F	2.02366
	P (00)	0.0277748	0.561663	0.742259	68.9942	0.978541	71.3044		P (00)	2.04142	10.2358	11.6013	0	15.7071	39.5856		P	0.182032
	O (00)	0.00691924	0.09842	0.0798493	1.86099	9.12051	11.1667		O (00)	0.297461	1.37437	1.88396	26.9911	0	30.5469		O	2.3818
	All (00)	0.718098	6.96076	9.8981	72.244	10.1791	100		All (00)	3.2165	12.2229	13.9084	52.8468	17.8039	99.9984
							100								99.9984
LS17	Conversion Matrix (in %)	S (06)	C (06)	F (06)	P (06)	O (06)	All (06)	LS17	Change Matrix (in %)	S (06)	C (06)	F (06)	P (06)	O (06)	All (06)
	S (00)	0.898753	0.00879841	0.00392757	0.013208	0.00122928	0.925917		S (00)	0	0.331608	0.393589	0.406783	0.174796	1.30678		S	1.19415
	C (00)	0.0339137	6.20288	0.0451885	0.34276	0.0249446	6.64969		C (00)	2.99571	0	1.06475	5.81265	0.771247	10.6444		C	0.872811
	F (00)	0.0122973	0.134617	20.5117	0.769419	0.0453019	21.4734		F (00)	0.8636	2.6962	0	17.0272	1.24118	21.8281		F	1.58053
	P (00)	0.0399134	0.381186	1.15475	52.9463	0.460448	54.9826		P (00)	2.6965	7.5718	22.1776	0	9.5314	41.9773		P	0.305981
	O (00)	0.00160814	0.0452703	0.0810507	0.779902	15.0606	15.9684		O (00)	0.160193	1.02719	2.63649	20.4195	0	24.2434		O	2.9074
	All (00)	0.986486	6.77275	21.7967	54.8516	15.5925	100		All (00)	6.716	11.6268	26.2724	43.6661	11.7186	100
							100								100
LS18	Conversion Matrix (in %)	S (06)	C (06)	F (06)	P (06)	O (06)	All (06)	LS18	Change Matrix (in %)	S (06)	C (06)	F (06)	P (06)	O (06)	All (06)
	S (00)	1.21562	0.0125248	0.00419426	0.0138812	0.00142285	1.24765		S (00)	0	0.25541	0.0899737	0.213554	0.0531828	0.61212		S	1.34248
	C (00)	0.0480815	13.5256	0.217956	1.06345	0.0307239	14.8858		C (00)	1.524	0	2.42409	10.232	0.489775	14.6699		C	1.78434
	F (00)	0.0155206	0.428558	18.6917	2.05931	0.0486958	21.2437		F (00)	0.697302	4.02105	0	20.5134	1.09932	26.331		F	2.36795
	P (00)	0.052253	1.86181	2.75667	53.1834	0.404504	58.2587		P (00)	1.55241	16.9296	24.9744	0	4.79302	48.2495		P	0.514375
	O (00)	0.00360749	0.0565641	0.0809617	0.577824	3.64519	4.36414		O (00)	0.099629	0.658141	1.59525	7.78448	0	10.1375		O	7.8516
	All (00)	1.33509	15.8851	21.7514	56.8979	4.13053	100		All (00)	3.87334	21.8642	29.0838	38.7434	6.43529	100
							100								100
LS19	Conversion Matrix (in %)	S (06)	C (06)	F (06)	P (06)	O (06)	All (06)	LS19	Change Matrix (in %)	S (06)	C (06)	F (06)	P (06)	O (06)	All (06)
	S (00)	1.05255	0.0135119	0.00400247	0.0222963	0.00120766	1.09357		S (00)	0	0.288149	0.144837	0.844016	0.0758574	1.35286		S	1.24475
	C (00)	0.0469159	29.1086	0.293647	1.61601	0.0476631	31.1128		C (00)	1.76491	0	3.22293	14.1362	1.0956	20.2197		C	0.993492
	F (00)	0.0123485	0.537481	12.6931	1.01146	0.0283229	14.2827		F (00)	0.571874	4.81889	0	9.13671	0.628117	15.1556		F	3.03738
	P (00)	0.0560552	3.43465	1.51469	44.7072	0.307205	50.0198		P (00)	1.82791	28.2886	17.8775	0	3.99534	51.9894		P	0.958993
	O (00)	0.00808667	0.191194	0.0663379	0.743893	2.48156	3.49107		O (00)	0.205163	1.58487	1.53028	7.96223	0	11.2825		O	3.59114
	All (00)	1.17596	33.2854	14.5718	48.1009	2.86596	100		All (00)	4.36986	34.9805	22.7756	32.0792	5.79492	100
							100								100
LS20	Conversion Matrix (in %)	S (06)	C (06)	F (06)	P (06)	O (06)	All (06)	LS20	Change Matrix (in %)	S (06)	C (06)	F (06)	P (06)	O (06)	All (06)
	S (00)	0.28597	0.00152259	0.000112297	0.00197949	0.00154936	0.291134		S (00)	0	0.0274976	0.00208491	0.0482095	0.0425952	0.120387		S	1.522
	C (00)	0.00403797	1.34686	0.00132155	0.0460666	0.0223265	1.42061		C (00)	0.136457	0	0.0635702	1.31535	0.613441	2.12882		C	0.169479
	F (00)	0.00029609	0.00317413	1.29525	0.268329	0.0303309	1.59738		F (00)	0.0361542	0.099672	0	6.23693	0.633602	7.00636		F	0.109039
	P (00)	0.00844148	0.0718993	0.128864	33.1245	1.80447	35.1381		P (00)	0.5354	2.35473	3.31861	0	34.2246	40.4333		P	2.07569
	O (00)	0.016914	0.0896237	0.0253769	3.14281	58.278	61.5527		O (00)	0.680456	2.87899	0.708562	46.0431	0	50.3111		O	1.16224
	All (00)	0.315659	1.51308	1.45092	36.5837	60.1367	100		All (00)	1.38847	5.36089	4.09282	53.6436	35.5142	100
							100								100
LS21	Conversion Matrix (in %)	S (06)	C (06)	F (06)	P (06)	O (06)	All (06)	LS21	Change Matrix (in %)	S (06)	C (06)	F (06)	P (06)	O (06)	All (06)
	S (00)	0.260939	0.00454598	6.75011e-05	0.00262168	0.0024269	0.270601		S (00)	0	0.059338	0.0015027	0.0633272	0.0409435	0.165111		S	1.45613
	C (00)	0.00646548	4.59567	0.00229779	0.122177	0.0655669	4.79218		C (00)	0.151505	0	0.0995628	2.7442	1.20088	4.19615		C	1.82701
	F (00)	0.000258207	0.00625417	1.32899	0.172156	0.0199214	1.52758		F (00)	0.0148077	0.125117	0	4.0806	0.355126	4.57565		F	3.2507
	P (00)	0.0171793	0.244894	0.105855	35.5119	2.7571	38.6369		P (00)	0.861649	6.01431	2.48251	0	36.4072	45.7657		P	0.810498
	O (00)	0.00985904	0.19018	0.0221202	3.16818	51.3824	54.7728		O (00)	0.362436	3.38334	0.399048	41.1526	0	45.2974		O	0.564902
	All (00)	0.294701	5.04155	1.45933	38.977	54.2274	100		All (00)	1.3904	9.58211	2.98263	48.0407	38.0042	100
							100								100
LS22	Conversion Matrix (in %)	S (06)	C (06)	F (06)	P (06)	O (06)	All (06)	LS22	Change Matrix (in %)	S (06)	C (06)	F (06)	P (06)	O (06)	All (06)
	S (00)	10.8189	0.0886221	0.0214986	0.043293	0.0102296	10.9826		S (00)	0	2.50259	0.796169	1.17532	0.371737	4.84581		S	0.693817
	C (00)	0.377045	39.9908	0.152075	0.348921	0.0696675	40.9386		C (00)	17.6306	0	3.72938	7.59526	1.57468	30.53		C	0.31601
	F (00)	0.09366	0.213873	20.9748	0.421828	0.0359476	21.7401		F (00)	4.40088	4.47309	0	9.62707	1.56757	20.0686		F	0.629839
	P (00)	0.204129	0.606799	0.595507	18.7486	0.249286	20.4044		P (00)	8.79429	11.397	9.43727	0	5.65802	35.2866		P	0.845234
	O (00)	0.0399439	0.111776	0.0308462	0.241622	5.5102	5.93438		O (00)	1.24645	2.06734	1.28067	4.67457	0	9.26902		O	1.21625
	All (00)	11.5337	41.0119	21.7748	19.8043	5.87533	100		All (00)	32.0723	20.44	15.2435	23.0722	9.172	100
							100								100
LS23	Conversion Matrix (in %)	S (06)	C (06)	F (06)	P (06)	O (06)	All (06)	LS23	Change Matrix (in %)	S (06)	C (06)	F (06)	P (06)	O (06)	All (06)
	S (00)	31.481	0.128311	0.0506672	0.0950602	0.0156834	31.7707		S (00)	0	2.67407	1.01688	1.89071	0.382005	5.96366		S	0.593612
	C (00)	0.787288	30.1615	0.102763	0.235397	0.0492038	31.3362		C (00)	26.1112	0	2.23776	4.79386	1.13504	34.2779		C	0.640214
	F (00)	0.237706	0.136448	15.3873	0.377005	0.045947	16.1844		F (00)	7.80959	2.49976	0	7.40538	1.17185	18.8866		F	1.02355
	P (00)	0.476038	0.39405	0.525208	14.2162	0.164547	15.7761		P (00)	15.1458	6.88239	7.68726	0	3.93752	33.6529		P	1.07395
	O (00)	0.0775948	0.0659524	0.0436119	0.144183	4.60126	4.93261		O (00)	1.9912	1.21725	1.06078	2.94972	0	7.21894		O	1.08699
	All (00)	33.0597	30.8863	16.1095	15.0679	4.87664	100		All (00)	51.0578	13.2735	12.0027	17.0397	6.62642	100
							100								100

## Sheet: CLC_00_06
24 Land Systems classification		WGT_AVG (temporarely normalized)	WGT_AVG	WGT_AVG	WGT_AVG	WGT_AVG
No PP LS Code	Land system name	settlement	cropland	forest	pasture	other land			Total area LS Urb.	Total area LS Crop	Total area LS Forest	Total area LS Grassland	Total area LS Other
0	Cropland; extensive with few livestock	143.526	133.068	133.133	129.737	102.18			42470150000	42470150000	42470150000	42470150000	42470150000
1	Cropland; extensive with bovines, goats & sheep	100	100	100	100	100			3241070000	3241070000	3241070000	3241070000	3241070000
2	Cropland; medium intensive with few livestock	122.843	253.712	199.973	230.257	115.359			367209390000	367209390000	367209390000	367209390000	367209390000
3	Cropland; medium intensive with bovines, goats & sheep	117.582	258.496	289.016	111.772	139.542			28324870000	28324870000	28324870000	28324870000	28324870000
4	Cropland; intensive with few livestock	159.725	186.608	173.246	185.745	131.354			677471590000	677471590000	677471590000	677471590000	677471590000
5	Cropland; intensive with bovines, goats & sheep	112.811	132.417	127.664	143.128	140.091			58327430000	58327430000	58327430000	58327430000	58327430000
6	Mosaic cropland and grassland with bovines, goats & sheep	133.844	147.778	112.261	134.184	105.53			101549550000	101549550000	101549550000	101549550000	101549550000
7	Mosaic cropland (extensive) and grassland with few livestock	100.717	194.775	100	140.628	158.995			59947420000	59947420000	59947420000	59947420000	59947420000
8	Mosaic cropland (medium intensive) and grassland with few livestock	129.813	209.295	161.421	219.515	169.355			262670030000	262670030000	262670030000	262670030000	262670030000
9	Mosaic cropland (intensive) and grassland with few livestock	118.584	179.72	144.513	244.311	125.662			191574150000	191574150000	191574150000	191574150000	191574150000
10	Mosaic cropland (extensive) and forest with few livestock	109.709	101.812	106.42	124.302	100.248			18935960000	18935960000	18935960000	18935960000	18935960000
11	Mosaic cropland (medium intensive) and forest with few livestock	127.789	184.625	180.206	178.679	136.355			201636410000	201636410000	201636410000	201636410000	201636410000
12	Mosaic cropland (intensive) and forest with few livestock	125.067	205.241	140.508	200.763	114.212			377242200000	377242200000	377242200000	377242200000	377242200000
13	Dense forest	122.615	183.28	147.221	182.443	126.791			175711200000	175711200000	175711200000	175711200000	175711200000
14	Open forest with few livestock	125.16	183.116	141.357	156.425	154.109			855825970000	855825970000	855825970000	855825970000	855825970000
15	Mosaic grassland and forest	117.398	151.049	226.927	164.208	164.616			866629520000	866629520000	866629520000	866629520000	866629520000
16	Mosaic grassland and bare	112.078	171.027	100.429	159.274	103.789			217535310000	217535310000	217535310000	217535310000	217535310000
17	Natural grassland	100.603	103.996	105.545	105.782	100			110850880000	110850880000	110850880000	110850880000	110850880000
18	Grassland with few livestock	149.866	154.505	174.542	169.437	124.305			375597360000	375597360000	375597360000	375597360000	375597360000
19	Grassland with bovines, goats and sheep	132.624	170.119	155.043	140.049	198.198			88372980000	88372980000	88372980000	88372980000	88372980000
20	Bare	100	100	101.382	100	100			56261710000	56261710000	56261710000	56261710000	56261710000
21	Bare with few livestock	102.497	100.648	100	136.072	100.034			47533840000	47533840000	47533840000	47533840000	47533840000
22	Peri-urban & villages	141.082	140.691	219.189	218.803	132.268			422108360000	422108360000	422108360000	422108360000	422108360000
23	Urban	175.313	119.939	175.964	157.131	203.929			102994810000	102994810000	102994810000	102994810000	102994810000
								SUM	5710022160000	5710022160000	5710022160000	5710022160000	5710022160000
																		Net change fraction of total change per class
LS00	Conversion Matrix (in %)	S (06)	C (06)	F (06)	P (06)	O (06)	All (06)	LS00	Change Matrix (in %)	S (06)	C (06)	F (06)	P (06)	O (06)	All (06)			MED (normalized)
	S (00)	3.66774	0	0.0021887	0.00185134	0	3.67178		S (00)	0	0	1.119	0.94652	0	2.06552		S	0.171906
	C (00)	0.0216072	44.3493	0	0.00985342	0.00321791	44.3839		C (00)	11.047	0	0	5.03769	1.6452	17.7298		C	0.0547284
	F (00)	0.00873474	0.0308614	18.0298	0	0.00434523	18.0738		F (00)	4.46574	15.7783	0	0	2.22155	22.4656		F	0.0834431
	P (00)	0.00390423	0.0988501	0.00115283	22.0051	0.00140392	22.1104		P (00)	1.99609	50.5383	0.5894	0	0.717771	53.8416		P	0.111126
	O (00)	0.000131749	0.00129102	0.00547263	0.000727802	11.7524	11.7601		O (00)	0.0673584	0.660051	2.79795	0.372098	0	3.89746		O	1.15021
	All (00)	3.70212	44.4803	18.0386	22.0176	11.7614	100		All (00)	17.5761	66.9767	4.50635	6.3563	4.58452	100
							100								100
LS01	Conversion Matrix (in %)	S (06)	C (06)	F (06)	P (06)	O (06)	All (06)	LS01	Change Matrix (in %)	S (06)	C (06)	F (06)	P (06)	O (06)	All (06)
	S (00)	3.01793	0	0	0	0	3.01793		S (00)	0	0	0	0	0	0		S	0
	C (00)	0.0037038	57.5697	0	0	0	57.5734		C (00)	2.16315	0	0	0	0	2.16315		C	0
	F (00)	0	0	10.6979	0	0.0224578	10.7203		F (00)	0	0	0	0	13.1162	13.1162		F	0
	P (00)	0.043081	0.0903141	0	21.0004	0.0116656	21.1454		P (00)	25.1609	52.7467	0	0	6.81311	84.7207		P	0
	O (00)	0	0	0	0	7.54294	7.54294		O (00)	0	0	0	0	0	0		O	0
	All (00)	3.06472	57.66	10.6979	21.0004	7.57706	100		All (00)	27.324	52.7467	0	0	19.9293	100
							100								100
LS02	Conversion Matrix (in %)	S (06)	C (06)	F (06)	P (06)	O (06)	All (06)	LS02	Change Matrix (in %)	S (06)	C (06)	F (06)	P (06)	O (06)	All (06)
	S (00)	3.05541	0.000834495	0.0181054	0.00204535	0.00101524	3.07741		S (00)	0	0.197137	4.27713	0.483183	0.239835	5.19729		S	0.984546
	C (00)	0.0678378	56.7785	0.0406407	0.0223494	0.0194727	56.9288		C (00)	16.0257	0	9.60075	5.27971	4.60014	35.5063		C	0.0360604
	F (00)	0.0235205	0.0181139	16.2487	0.00666805	0.0141187	16.3111		F (00)	5.55637	4.27913	0	1.57523	3.33533	14.7461		F	0.139677
	P (00)	0.0228707	0.0735866	0.0205154	19.3722	0.0160217	19.5052		P (00)	5.40285	17.3837	4.84645	0	3.78488	31.4179		P	0.109215
	O (00)	0.00345356	0.0133112	0.0265198	0.0123062	4.12196	4.17755		O (00)	0.815852	3.14457	6.2649	2.90715	0	13.1325		O	0.746269
	All (00)	3.17309	56.8843	16.3545	19.4155	4.17258	100		All (00)	27.8007	25.0046	24.9892	10.2453	11.9602	100
							100								100
LS03	Conversion Matrix (in %)	S (06)	C (06)	F (06)	P (06)	O (06)	All (06)	LS03	Change Matrix (in %)	S (06)	C (06)	F (06)	P (06)	O (06)	All (06)
	S (00)	2.69977	0	0.00216596	0	0.000460581	2.7024		S (00)	0	0	0.693439	0	0.147456	0.840895		S	1.55025
	C (00)	0.0334961	56.5049	0.110931	0.00099974	0.00406803	56.6544		C (00)	10.7239	0	35.5148	0.32007	1.30239	47.8611		C	0.0788573
	F (00)	0.00653571	0.0438662	14.4717	0.000234382	0.00438119	14.5267		F (00)	2.09242	14.0439	0	0.075038	1.40265	17.614		F	0.681023
	P (00)	0.0163559	0.0248831	0.0064992	22.6986	0.0318279	22.7782		P (00)	5.23638	7.96641	2.08074	0	10.1898	25.4733		P	0.212308
	O (00)	0.000586685	0.00489917	0.0201603	0	3.3127	3.33835		O (00)	0.187829	1.56848	6.45437	0	0	8.21068		O	1.13325
	All (00)	2.75674	56.5785	14.6114	22.6999	3.35344	100		All (00)	18.2405	23.5788	44.7433	0.395108	13.0423	100
							100								100
LS04	Conversion Matrix (in %)	S (06)	C (06)	F (06)	P (06)	O (06)	All (06)	LS04	Change Matrix (in %)	S (06)	C (06)	F (06)	P (06)	O (06)	All (06)
	S (00)	4.01967	0.00326447	0.00290392	0.00321549	0.00164018	4.03069		S (00)	0	0.975132	0.867432	0.960501	0.48994	3.293		S	0.476318
	C (00)	0.121894	61.3218	0.0181819	0.0298395	0.00504658	61.4968		C (00)	36.4111	0	5.43113	8.9134	1.50747	52.2631		C	0.0339337
	F (00)	0.0153467	0.00647139	18.8898	0.00352647	0.00293761	18.9181		F (00)	4.58423	1.93308	0	1.05339	0.877496	8.44819		F	0.0392574
	P (00)	0.0182222	0.0605231	0.0177203	13.4275	0.0176986	13.5416		P (00)	5.44316	18.0789	5.29325	0	5.28675	34.1021		P	0.0910747
	O (00)	0.000548447	0.00060097	0.00222262	0.00296722	2.0064	2.01274		O (00)	0.163827	0.179516	0.663921	0.886342	0	1.89361		O	0.648968
	All (00)	4.17568	61.3927	18.9309	13.467	2.03372	100		All (00)	46.6023	21.1666	12.2557	11.8136	8.16166	100
							100								100
LS05	Conversion Matrix (in %)	S (06)	C (06)	F (06)	P (06)	O (06)	All (06)	LS05	Change Matrix (in %)	S (06)	C (06)	F (06)	P (06)	O (06)	All (06)
	S (00)	4.16025	0.001271	0.00126896	0.00148634	0.000939074	4.16522		S (00)	0	0.038591	0.0385289	0.0451293	0.0285128	0.150762		S	0.753881
	C (00)	0.174801	63.4556	0.0183085	0.0345184	0.00436313	63.6876		C (00)	5.30741	0	0.555894	1.04807	0.132476	7.04385		C	0.0520213
	F (00)	0.0089602	0.00135541	11.5215	0.000107065	0.0121459	11.5441		F (00)	0.272056	0.0411539	0	0.00325077	0.368783	0.685243		F	0.26738
	P (00)	0.0339011	0.0329678	2.93879	16.4648	0.000335299	19.4708		P (00)	1.02933	1.00099	89.2294	0	0.0101806	91.2699		P	0.148036
	O (00)	0.000561748	0	0.00752093	0.0199206	1.10433	1.13234		O (00)	0.0170562	0	0.228355	0.604843	0	0.850254		O	0.995025
	All (00)	4.37848	63.4912	14.4874	16.5208	1.12212	100		All (00)	6.62585	1.08073	90.0522	1.70129	0.539952	100
							100								100
LS06	Conversion Matrix (in %)	S (06)	C (06)	F (06)	P (06)	O (06)	All (06)	LS06	Change Matrix (in %)	S (06)	C (06)	F (06)	P (06)	O (06)	All (06)
	S (00)	3.66991	0.000321503	0.000216356	0.00373957	0.00220769	3.6764		S (00)	0	0.0667377	0.0449113	0.77626	0.458272	1.34618		S	0.948493
	C (00)	0.115531	38.9594	0.0462861	0.00819123	0.0124122	39.1418		C (00)	23.982	0	9.60807	1.70034	2.57654	37.8669		C	0.0772971
	F (00)	0.0268394	0.0204315	17.3982	0.0159103	0.0176694	17.479		F (00)	5.57133	4.24117	0	3.30267	3.66781	16.783		F	0.256003
	P (00)	0.0756557	0.0309558	0.05463	35.3095	0.00981598	35.4805		P (00)	15.7046	6.42581	11.3401	0	2.0376	35.5082		P	0.0892554
	O (00)	0.00328459	0.00373094	0.0281714	0.00574066	4.18132	4.22225		O (00)	0.681816	0.774468	5.84782	1.19165	0	8.49575		O	1.28676
	All (00)	3.89122	39.0149	17.5275	35.343	4.22343	100		All (00)	45.9398	11.5082	26.8409	6.97091	8.74023	100
							100								100
LS07	Conversion Matrix (in %)	S (06)	C (06)	F (06)	P (06)	O (06)	All (06)	LS07	Change Matrix (in %)	S (06)	C (06)	F (06)	P (06)	O (06)	All (06)
	S (00)	2.00137	0	0.000223496	0	0.00036619	2.00196		S (00)	0	0	0.173063	0	0.283558	0.456621		S	0.961538
	C (00)	0.0207209	27.2256	0	0.00253838	0.00244305	27.2513		C (00)	16.0451	0	0	1.96558	1.89177	19.9025		C	0.0771337
	F (00)	0.00725736	0.00255334	18.8635	0	0.000193311	18.8735		F (00)	5.61971	1.97717	0	0	0.14969	7.74656		F	0.0580121
	P (00)	0.0105729	0.0240645	0.00806626	29.6654	0.00337551	29.7114		P (00)	8.18712	18.6343	6.24608	0	2.61381	35.6813		P	0.039964
	O (00)	0.00174454	0.0322631	0.00805667	0.0047017	22.115	22.1618		O (00)	1.35088	24.9828	6.23865	3.64074	0	36.2131		O	0.0749547
	All (00)	2.04167	27.2845	18.8798	29.6726	22.1214	100		All (00)	31.2028	45.5942	12.6578	5.60632	4.93883	100
							100								100
LS08	Conversion Matrix (in %)	S (06)	C (06)	F (06)	P (06)	O (06)	All (06)	LS08	Change Matrix (in %)	S (06)	C (06)	F (06)	P (06)	O (06)	All (06)
	S (00)	2.91363	0.00103148	0.00118741	0.00378646	0.00108571	2.92072		S (00)	0	0.19432	0.223696	0.713328	0.204537	1.33588		S	1.31534
	C (00)	0.0698787	42.5895	0.0486199	0.01975	0.0114951	42.7392		C (00)	13.1644	0	9.15946	3.72068	2.16555	28.2101		C	0.0515641
	F (00)	0.0356808	0.023152	22.9343	0.0207228	0.0276375	23.0415		F (00)	6.72188	4.36159	0	3.90395	5.20661	20.194		F	0.117877
	P (00)	0.0285288	0.0603545	0.0682819	24.0602	0.0313317	24.2487		P (00)	5.37453	11.3701	12.8636	0	5.90256	35.5108		P	0.0869519
	O (00)	0.00318412	0.00748384	0.05662	0.011003	6.97152	7.04981		O (00)	0.599854	1.40988	10.6666	2.07284	0	14.7492		O	0.546327
	All (00)	3.0509	42.6815	23.109	24.1155	7.04307	100		All (00)	25.8607	17.3359	32.9134	10.4108	13.4793	100
							100								100
LS09	Conversion Matrix (in %)	S (06)	C (06)	F (06)	P (06)	O (06)	All (06)	LS09	Change Matrix (in %)	S (06)	C (06)	F (06)	P (06)	O (06)	All (06)
	S (00)	5.17607	0.00291097	0.00619497	0.00769321	0.00503289	5.1979		S (00)	0	0.619559	1.31851	1.63739	1.07118	4.64663		S	0.607843
	C (00)	0.127652	49.5025	0.0232692	0.0656191	0.00650629	49.7256		C (00)	27.1688	0	4.95252	13.9661	1.38477	47.4722		C	0.0560507
	F (00)	0.0285453	0.00847276	22.3717	0.0127058	0.00477313	22.4262		F (00)	6.07545	1.80331	0	2.70424	1.01589	11.5989		F	0.0766284
	P (00)	0.0408125	0.0502467	0.0280499	20.3892	0.0043328	20.5127		P (00)	8.68636	10.6943	5.97002	0	0.922175	26.2728		P	0.116877
	O (00)	0.000149826	0.00037374	0.00397436	0.042531	2.09058	2.13761		O (00)	0.0318883	0.0795451	0.845886	9.0521	0	10.0094		O	1.37545
	All (00)	5.37322	49.5645	22.4332	20.5178	2.11122	100		All (00)	41.9625	13.1967	13.0869	27.3598	4.39401	100
							100								100
LS10	Conversion Matrix (in %)	S (06)	C (06)	F (06)	P (06)	O (06)	All (06)	LS10	Change Matrix (in %)	S (06)	C (06)	F (06)	P (06)	O (06)	All (06)
	S (00)	2.0472	0.000339543	0.000339543	0.000322155	0	2.0482		S (00)	0	0.124723	0.124723	0.118336	0	0.367783		S	0.793651
	C (00)	0.0350264	18.0586	0.0161427	0	0	18.1097		C (00)	12.8661	0	5.92966	0	0	18.7958		C	0.17085
	F (00)	0.00173235	0.0339158	49.6415	0.00180936	0.0316723	49.7106		F (00)	0.636339	12.4582	0	0.664625	11.6341	25.3932		F	0.120325
	P (00)	0.00864624	0.101291	0.00492778	23.6637	0.0171973	23.7957		P (00)	3.17599	37.2069	1.8101	0	6.31701	48.51		P	0.105157
	O (00)	0	0	0.0188748	0	6.31688	6.33576		O (00)	0	0	6.93323	0	0	6.93323		O	1.92587
	All (00)	2.09261	18.1941	49.6817	23.6658	6.36575	100		All (00)	16.6785	49.7898	14.7977	0.782962	17.9511	100
							100								100
LS11	Conversion Matrix (in %)	S (06)	C (06)	F (06)	P (06)	O (06)	All (06)	LS11	Change Matrix (in %)	S (06)	C (06)	F (06)	P (06)	O (06)	All (06)
	S (00)	2.33339	4.93777e-05	0.00204225	0.00071241	0.000431	2.33662		S (00)	0	0.0135057	0.558592	0.194857	0.117886	0.884841		S	0.720908
	C (00)	0.034298	28.176	0.0547355	0.0177782	0.00266422	28.2855		C (00)	9.38112	0	14.9711	4.86266	0.728714	29.9436		C	0.0812094
	F (00)	0.0153335	0.0392928	43.5028	0.020491	0.0351502	43.6131		F (00)	4.194	10.7473	0	5.60465	9.61423	30.1602		F	0.0518312
	P (00)	0.0128175	0.0367926	0.036084	22.3647	0.0163909	22.4668		P (00)	3.50581	10.0635	9.86964	0	4.48321	27.9221		P	0.104773
	O (00)	7.94354e-05	0.000633947	0.0375256	0.0023039	3.25747	3.29801		O (00)	0.021727	0.173396	10.2639	0.630159	0	11.0892		O	1.18658
	All (00)	2.39591	28.2528	43.6332	22.406	3.3121	100		All (00)	17.1027	20.9977	35.6633	11.2923	14.944	100
							100								100
LS12	Conversion Matrix (in %)	S (06)	C (06)	F (06)	P (06)	O (06)	All (06)	LS12	Change Matrix (in %)	S (06)	C (06)	F (06)	P (06)	O (06)	All (06)
	S (00)	3.8223	0.00205016	0.00660351	0.00197421	0.00837461	3.8413		S (00)	0	0.563862	1.81618	0.542973	2.30329	5.22631		S	0.481348
	C (00)	0.0682303	33.2697	0.0228291	0.0552497	0.00892551	33.4249		C (00)	18.7656	0	6.27875	15.1955	2.45481	42.6946		C	0.0558923
	F (00)	0.0304191	0.00930548	38.2947	0.00716058	0.0090978	38.3507		F (00)	8.36625	2.55931	0	1.96939	2.50219	15.3971		F	0.0347612
	P (00)	0.0281519	0.0391841	0.0368395	21.9648	0.00493406	22.0739		P (00)	7.74271	10.7769	10.1321	0	1.35703	30.0087		P	0.0913825
	O (00)	5.78571e-05	0.000666046	0.0117188	0.0118206	2.28493	2.30919		O (00)	0.0159126	0.183184	3.22304	3.25106	0	6.6732		O	1.08932
	All (00)	3.94916	33.3209	38.3727	22.041	2.31626	100		All (00)	34.8904	14.0833	21.4501	20.9589	8.61732	100
							100								100
LS13	Conversion Matrix (in %)	S (06)	C (06)	F (06)	P (06)	O (06)	All (06)	LS13	Change Matrix (in %)	S (06)	C (06)	F (06)	P (06)	O (06)	All (06)
	S (00)	1.87274	0.000730901	0.00178946	0.000471815	0.000754117	1.87648		S (00)	0	0.409116	1.00164	0.264095	0.422111	2.09696		S	0.600262
	C (00)	0.0161417	7.19432	0.00294001	0.0173055	0.00116038	7.23187		C (00)	9.0352	0	1.64565	9.68662	0.649516	21.017		C	0.160111
	F (00)	0.0179557	0.00508842	69.0951	0.00564393	0.0443934	69.1682		F (00)	10.0506	2.84821	0	3.15915	24.8489	40.9068		F	0.0187885
	P (00)	0.0102937	0.00941836	0.0374613	15.3522	0.00129329	15.4106		P (00)	5.7618	5.27185	20.9687	0	0.723911	32.7262		P	0.107805
	O (00)	0.000529574	0	0.00318947	0.00209256	6.307	6.31282		O (00)	0.296425	0	1.78528	1.1713	0	3.253		O	1.40199
	All (00)	1.91766	7.20956	69.1405	15.3777	6.35461	100		All (00)	25.144	8.52917	25.4012	14.2812	26.6444	100
							100								100
LS14	Conversion Matrix (in %)	S (06)	C (06)	F (06)	P (06)	O (06)	All (06)	LS14	Change Matrix (in %)	S (06)	C (06)	F (06)	P (06)	O (06)	All (06)
	S (00)	2.04436	0.000283941	0.00244747	0.00178473	0.0011681	2.05004		S (00)	0	0.122869	1.05909	0.772304	0.505473	2.45974		S	0.587508
	C (00)	0.0140652	10.3145	0.00408579	0.0171274	0.000430799	10.3503		C (00)	6.08644	0	1.76804	7.41153	0.186419	15.4524		C	0.088039
	F (00)	0.0228919	0.0115117	59.1885	0.0119962	0.0166518	59.2516		F (00)	9.906	4.98146	0	5.19113	7.20571	27.2843		F	0.0191262
	P (00)	0.0133758	0.0255143	0.0527567	22.159	0.00592198	22.2566		P (00)	5.7881	11.0408	22.8294	0	2.56262	42.2209		P	0.0720643
	O (00)	0.000643359	6.38803e-05	0.0128077	0.0155625	6.06244	6.09152		O (00)	0.2784	0.0276429	5.54225	6.73435	0	12.5826		O	0.674778
	All (00)	2.09533	10.3519	59.2606	22.2055	6.08661	100		All (00)	22.0589	16.1728	31.1988	20.1093	10.4602	100
							100								100
LS15	Conversion Matrix (in %)	S (06)	C (06)	F (06)	P (06)	O (06)	All (06)	LS15	Change Matrix (in %)	S (06)	C (06)	F (06)	P (06)	O (06)	All (06)
	S (00)	2.22751	0.000337113	0.00365927	0.00342745	0.00105635	2.23599		S (00)	0	0.105744	1.14782	1.07511	0.33135	2.66003		S	0.781542
	C (00)	0.0296132	13.8695	0.00910554	0.0182932	0.00326047	13.9298		C (00)	9.28893	0	2.85618	5.73814	1.02273	18.906		C	0.106646
	F (00)	0.0254194	0.0196656	47.0026	0.0209471	0.0338441	47.1025		F (00)	7.97345	6.16862	0	6.57058	10.6161	31.3287		F	0.0364975
	P (00)	0.024676	0.0290044	0.0488199	27.9001	0.0131821	28.0158		P (00)	7.74027	9.09797	15.3136	0	4.13489	36.2867		P	0.0699818
	O (00)	0.000818819	6.22998e-05	0.0268918	0.00671673	8.68148	8.71597		O (00)	0.256843	0.0195419	8.43529	2.10687	0	10.8185		O	1.32337
	All (00)	2.30804	13.9185	47.0911	27.9495	8.73282	100		All (00)	25.2595	15.3919	27.7529	15.4907	16.105	100
							100								100
LS16	Conversion Matrix (in %)	S (06)	C (06)	F (06)	P (06)	O (06)	All (06)	LS16	Change Matrix (in %)	S (06)	C (06)	F (06)	P (06)	O (06)	All (06)
	S (00)	0.861846	0	9.46904e-06	0.00116782	0.00256566	0.865589		S (00)	0	0	0.00650196	0.801886	1.76172	2.57011		S	1.64887
	C (00)	0.0116019	10.715	0	0.00164445	0.00278289	10.731		C (00)	7.96647	0	0	1.12917	1.91088	11.0065		C	0.0594219
	F (00)	0.00607828	0.000600373	14.5384	0.0147017	0.017787	14.5776		F (00)	4.17368	0.412249	0	10.095	12.2135	26.8945		F	0.156087
	P (00)	0.0171409	0.013073	0.0120207	29.961	0.0052648	30.0085		P (00)	11.7699	8.97664	8.25408	0	3.6151	32.6157		P	0.0424244
	O (00)	0.00545103	0.00202321	0.0302574	0.00146297	43.7781	43.8172		O (00)	3.74298	1.38925	20.7764	1.00456	0	26.9132		O	0.0984833
	All (00)	0.902118	10.7307	14.5807	29.98	43.8065	100		All (00)	27.653	10.7781	29.037	13.0306	19.5012	100
							100								100
LS17	Conversion Matrix (in %)	S (06)	C (06)	F (06)	P (06)	O (06)	All (06)	LS17	Change Matrix (in %)	S (06)	C (06)	F (06)	P (06)	O (06)	All (06)
	S (00)	1.9315	0.00039843	0.00238532	0	0.00039768	1.93469		S (00)	0	0.16529	0.989559	0	0.164979	1.31983		S	1.19924
	C (00)	0.0574794	11.4201	0.00264195	0.000600431	0.00724928	11.4881		C (00)	23.8455	0	1.09602	0.249091	3.00739	28.198		C	0.158699
	F (00)	0.0154244	0.00273102	17.3794	0.000835717	0.00285498	17.4013		F (00)	6.39888	1.13297	0	0.3467	1.1844	9.06295		F	0.444815
	P (00)	0.0694351	0.00793873	0.0148937	36.4216	0.00925809	36.5231		P (00)	28.8054	3.29341	6.17871	0	3.84075	42.1182		P	0.0752134
	O (00)	0.00293968	0	0.0423663	0.00121881	32.6063	32.6528		O (00)	1.21954	0	17.5758	0.505629	0	19.301		O	0.525756
	All (00)	2.07678	11.4312	17.4417	36.4243	32.6261	100		All (00)	60.2693	4.59167	25.8401	1.10142	8.19752	100
							100								100
LS18	Conversion Matrix (in %)	S (06)	C (06)	F (06)	P (06)	O (06)	All (06)	LS18	Change Matrix (in %)	S (06)	C (06)	F (06)	P (06)	O (06)	All (06)
	S (00)	2.85683	0.00119985	0.00228437	0.00270216	0.00364389	2.86666		S (00)	0	0.283515	0.539779	0.6385	0.861022	2.32282		S	0.956284
	C (00)	0.0454255	21.2632	0.0100023	0.0179749	0.00562739	21.3422		C (00)	10.7337	0	2.36346	4.24734	1.32971	18.6742		C	0.0901262
	F (00)	0.0149566	0.0124343	31.7031	0.0208178	0.0389205	31.7902		F (00)	3.53414	2.93812	0	4.91908	9.19661	20.5879		F	0.103223
	P (00)	0.0359466	0.0319725	0.0508821	30.9705	0.0195988	31.1089		P (00)	8.4939	7.55485	12.023	0	4.63105	32.7028		P	0.0991285
	O (00)	0.00103698	0.00286137	0.0388317	0.0660853	12.7831	12.892		O (00)	0.245031	0.67612	9.17563	15.6154	0	25.7122		O	1.04954
	All (00)	2.9542	21.3117	31.8051	31.0781	12.8509	100		All (00)	23.0067	11.4526	24.1019	25.4203	16.0184	100
							100								100
LS19	Conversion Matrix (in %)	S (06)	C (06)	F (06)	P (06)	O (06)	All (06)	LS19	Change Matrix (in %)	S (06)	C (06)	F (06)	P (06)	O (06)	All (06)
	S (00)	2.50383	0.00152726	0.00210198	0.006837	0.00100978	2.51531		S (00)	0	0.292526	0.402607	1.30953	0.19341	2.19808		S	1.02619
	C (00)	0.0316977	19.127	0.0360928	0.015325	0.00317639	19.2133		C (00)	6.07126	0	6.91309	2.93529	0.608395	16.528		C	0.112309
	F (00)	0.0211403	0.0226095	24.222	0.00624158	0.00891167	24.281		F (00)	4.04913	4.33054	0	1.19549	1.70691	11.2821		F	0.388624
	P (00)	0.0513935	0.04063	0.11737	48.7567	0.0320619	48.9981		P (00)	9.84372	7.78211	22.4805	0	6.14102	46.2474		P	0.0871547
	O (00)	0.0102372	0.000866079	0.0717449	0.0411201	4.86836	4.99233		O (00)	1.9608	0.165886	13.7418	7.87599	0	23.7444		O	0.994152
	All (00)	2.6183	19.1926	24.4494	48.8262	4.91352	100		All (00)	21.9249	12.5711	43.538	13.3163	8.64974	100
							100								100
LS20	Conversion Matrix (in %)	S (06)	C (06)	F (06)	P (06)	O (06)	All (06)	LS20	Change Matrix (in %)	S (06)	C (06)	F (06)	P (06)	O (06)	All (06)
	S (00)	0.762036	0	0	0	0	0.762036		S (00)	0	0	0	0	0	0		S	1.83355
	C (00)	0.00822041	2.00354	0	0.00321906	0	2.01498		C (00)	13.3203	0	0	5.21615	0	18.5365		C
	F (00)	5.32495e-05	0	2.43493	0	0	2.43498		F (00)	0.0862852	0	0	0	0	0.0862852		F
	P (00)	0.00837926	0.00176225	0.0114333	19.6292	0	19.6507		P (00)	13.5777	2.85554	18.5265	0	0	34.9597		P	0.0866551
	O (00)	0.0225583	0	0.00294581	0.0031417	75.1086	75.1373		O (00)	36.5533	0	4.77338	5.09081	0	46.4175		O	0.109675
	All (00)	0.801247	2.00531	2.44931	19.6355	75.1086	100		All (00)	63.5377	2.85554	23.2998	10.307	0	100
							100								100
LS21	Conversion Matrix (in %)	S (06)	C (06)	F (06)	P (06)	O (06)	All (06)	LS21	Change Matrix (in %)	S (06)	C (06)	F (06)	P (06)	O (06)	All (06)
	S (00)	0.988988	0	0	0.00282426	0	0.991812		S (00)	0	0	0	0.864806	0	0.864806		S	2.85714
	C (00)	0.0256373	17.9132	0	0.000128509	0	17.939		C (00)	7.85028	0	0	0.0393502	0	7.88963		C	0.135835
	F (00)	0.00150456	0	7.22485	0.0212727	0	7.24762		F (00)	0.460703	0	0	6.51382	0	6.97452		F	1.14782
	P (00)	0.0331629	0.0460928	0.00445822	25.6667	0.173486	25.9239		P (00)	10.1547	14.1139	1.36513	0	53.1225	78.7562		P	0.124254
	O (00)	0.00753798	0	0.00355385	0.00691838	47.8797	47.8977		O (00)	2.30817	0	1.08821	2.11845	0	5.51483		O	0.182445
	All (00)	1.05683	17.9593	7.23286	25.6978	48.0532	100		All (00)	20.7738	14.1139	2.45334	9.53642	53.1225	100
							100								100
LS22	Conversion Matrix (in %)	S (06)	C (06)	F (06)	P (06)	O (06)	All (06)	LS22	Change Matrix (in %)	S (06)	C (06)	F (06)	P (06)	O (06)	All (06)
	S (00)	10.8042	0.0061043	0.00888857	0.00847862	0.00457761	10.8322		S (00)	0	1.09836	1.59934	1.52558	0.823662	5.04695		S	0.439855
	C (00)	0.248527	44.0662	0.0152341	0.0239697	0.00331175	44.3572		C (00)	44.7181	0	2.74112	4.31294	0.595892	52.368		C	0.0913205
	F (00)	0.0409901	0.00211925	23.0068	0.00338233	0.016718	23.07		F (00)	7.37546	0.381323	0	0.608591	3.00811	11.3735		F	0.0821742
	P (00)	0.0915446	0.0297793	0.0112224	17.3693	0.0088989	17.5108		P (00)	16.4719	5.35827	2.01928	0	1.6012	25.4506		P	0.136986
	O (00)	0.0109693	0.00273163	0.0118021	0.00651407	4.19774	4.22975		O (00)	1.97373	0.491509	2.12358	1.17209	0	5.76092		O	0.665748
	All (00)	11.1962	44.1069	23.054	17.4117	4.23124	100		All (00)	70.5391	7.32947	8.48332	7.61921	6.02886	100
							100								100
LS23	Conversion Matrix (in %)	S (06)	C (06)	F (06)	P (06)	O (06)	All (06)	LS23	Change Matrix (in %)	S (06)	C (06)	F (06)	P (06)	O (06)	All (06)
	S (00)	26.165	0.00628466	0.00791682	0.0220562	0.0033784	26.2047		S (00)	0	0.618175	0.778718	2.1695	0.332308	3.8987		S	0.36628
	C (00)	0.613752	40.2518	0.0212422	0.0184054	0.00631002	40.9115		C (00)	60.3702	0	2.08943	1.8104	0.62067	64.8907		C	0.208614
	F (00)	0.0314542	0.000688325	16.2343	0.00183313	0.016122	16.2844		F (00)	3.09392	0.0677054	0	0.180311	1.5858	4.92773		F	0.141815
	P (00)	0.147611	0.0418556	0.0226389	12.7393	0.0143078	12.9657		P (00)	14.5194	4.11702	2.22681	0	1.40735	22.2706		P	0.303296
	O (00)	0.00996589	0.00287445	0.0127048	0.015246	3.59292	3.63372		O (00)	0.98027	0.282738	1.24968	1.49964	0	4.01233		O	0.55911
	All (00)	26.9678	40.3035	16.2988	12.7969	3.63304	100		All (00)	78.9637	5.08564	6.34465	5.65985	3.94612	100
							100								100

## Sheet: CLC_06_12
24 Land Systems classification		WGT_AVG (temporarely normalized)	WGT_AVG	WGT_AVG	WGT_AVG	WGT_AVG
No PP LS Code	Land system name	settlement	cropland	forest	pasture	other land			Total area LS Urb	Total area LS Crop	Total area LS Forest	Total area LS Grassland	Total area LS Other
0	Cropland; extensive with few livestock	104.741	293.829	201.407	132.577	106.541			42467350000	42467350000	42467350000	42467350000	42467350000
1	Cropland; extensive with bovines, goats & sheep	100	100	100	100	100			3241070000	3241070000	3241070000	3241070000	3241070000
2	Cropland; medium intensive with few livestock	226.287	190.486	186.453	192.494	148.329			246537170000	246537170000	246537170000	246537170000	246537170000
3	Cropland; medium intensive with bovines, goats & sheep	107.311	160.012	122.739	203.165	103.951			28324870000	28324870000	28324870000	28324870000	28324870000
4	Cropland; intensive with few livestock	156.659	320.056	188.076	297.619	122.097			677464660000	677464660000	677464660000	677464660000	677464660000
5	Cropland; intensive with bovines, goats & sheep	156.945	186.641	185.723	167.227	118.734			58327450000	58327450000	58327450000	58327450000	58327450000
6	Mosaic cropland and grassland with bovines, goats & sheep	155.435	248.367	195.853	614.69	136.823			101549550000	101549550000	101549550000	101549550000	101549550000
7	Mosaic cropland (extensive) and grassland with few livestock	103.541	154.949	115.959	172.316	113.882			59947420000	59947420000	59947420000	59947420000	59947420000
8	Mosaic cropland (medium intensive) and grassland with few livestock	111.619	282.062	181.866	216.53	126.226			262668280000	262668280000	262668280000	262668280000	262668280000
9	Mosaic cropland (intensive) and grassland with few livestock	137.173	235.118	152.399	251.65	120.871			191562570000	191562570000	191562570000	191562570000	191562570000
10	Mosaic cropland (extensive) and forest with few livestock	121.879	393.679	160.657	140.924	306.364			18935790000	18935790000	18935790000	18935790000	18935790000
11	Mosaic cropland (medium intensive) and forest with few livestock	119.751	308.755	218.006	166.878	226.444			201632520000	201632520000	201632520000	201632520000	201632520000
12	Mosaic cropland (intensive) and forest with few livestock	144.085	264.813	220.922	249.759	142.292			377232760000	377232760000	377232760000	377232760000	377232760000
13	Dense forest	107.98	190.392	150.155	229.193	119.014			175701560000	175701560000	175701560000	175701560000	175701560000
14	Open forest with few livestock	125.179	196.05	237.438	307.955	151.851			707106920000	707106920000	707106920000	707106920000	707106920000
15	Mosaic grassland and forest	140.722	238.646	178.241	208.884	123.936			738059030000	738059030000	738059030000	738059030000	738059030000
16	Mosaic grassland and bare	117.167	251.556	118.531	139.514	124.157			217535400000	217535400000	217535400000	217535400000	217535400000
17	Natural grassland	149.484	148.307	101.713	165.773	235.194			110850880000	110850880000	110850880000	110850880000	110850880000
18	Grassland with few livestock	120.755	171.514	193.356	182.796	134.229			375597450000	375597450000	375597450000	375597450000	375597450000
19	Grassland with bovines, goats and sheep	163.39	255.64	160.291	269.611	148.379			88372980000	88372980000	88372980000	88372980000	88372980000
20	Bare	100	100	100	112.167	113.192			56261710000	56261710000	56261710000	56261710000	56261710000
21	Bare with few livestock	113.782	158.674	111.607	292.264	103.516			47533850000	47533850000	47533850000	47533850000	47533850000
22	Peri-urban & villages	148.583	268.021	199.76	272.885	146.585			422095040000	422095040000	422095040000	422095040000	422095040000
23	Urban	186.6	189.156	166.235	223.575	199.044			102994800000	102994800000	102994800000	102994800000	102994800000
								SUM	5312001080000	5312001080000	5312001080000	5312001080000	5312001080000
																		Net change fraction of total change per class
LS00	Conversion Matrix (in %)	S (06)	C (06)	F (06)	P (06)	O (06)	All (06)	LS00	Change Matrix (in %)	S (06)	C (06)	F (06)	P (06)	O (06)	All (06)			MED (normalized)
	S (00)	3.52516	0	0.000278707	0.00149012	0.000557401	3.52749		S (00)	0	0	0.160558	0.85843	0.321109	1.3401		S	0.622665
	C (00)	0.0426332	44.8942	0.00138999	0.00772892	0.00942127	44.9554		C (00)	24.5602	0	0.800751	4.45249	5.42743	35.2409		C	0.0478228
	F (00)	0.00294586	0.0264537	17.4946	0.0219056	0.0138286	17.5598		F (00)	1.69706	15.2395	0	12.6194	7.96641	37.5224		F	0.0704556
	P (00)	0.00933104	0.0244233	0.000539433	21.8851	0.00237345	21.9217		P (00)	5.37544	14.0698	0.310758	0	1.3673	21.1234		P	0.22153
	O (00)	0.00702234	0	0.00114141	0.000121893	12.0273	12.0356		O (00)	4.04544	0	0.657546	0.0702203	0	4.77321		O	0.604016
	All (00)	3.58709	44.9451	17.498	21.9163	12.0535	100		All (00)	35.6782	29.3094	1.92961	18.0006	15.0822	100
							100								100
LS01	Conversion Matrix (in %)	S (06)	C (06)	F (06)	P (06)	O (06)	All (06)	LS01	Change Matrix (in %)	S (06)	C (06)	F (06)	P (06)	O (06)	All (06)
	S (00)	2.58494	0	0	0.0154414	0	2.60038		S (00)	0	0	0	20.509	0	20.509		S	2.84134
	C (00)	0.0237548	58.4898	0	0	0	58.5135		C (00)	31.5508	0	0	0	0	31.5508		C
	F (00)	0.0144817	0	10.7129	0	0.00814598	10.7355		F (00)	19.2344	0	0	0	10.8194	30.0538		F
	P (00)	0.00674953	0.00444456	0	24.2179	0	24.2291		P (00)	8.96464	5.90321	0	0	0	14.8678		P
	O (00)	0.00227264	0	0	0	3.9192	3.92147		O (00)	3.01849	0	0	0	0	3.01849		O
	All (00)	2.6322	58.4942	10.7129	24.2333	3.92734	100		All (00)	62.7684	5.90321	0	20.509	10.8194	100
							100								100
LS02	Conversion Matrix (in %)	S (06)	C (06)	F (06)	P (06)	O (06)	All (06)	LS02	Change Matrix (in %)	S (06)	C (06)	F (06)	P (06)	O (06)	All (06)
	S (00)	3.55339	0.000635962	0.00231983	0.00231572	0.00165374	3.56031		S (00)	0	0.165333	0.603092	0.602024	0.429927	1.80038		S	0.396893
	C (00)	0.0453854	54.8759	0.0660288	0.0374099	0.00660193	55.0313		C (00)	11.799	0	17.1657	9.72556	1.71632	40.4066		C	0.0337461
	F (00)	0.00811004	0.00354076	19.3956	0.00257453	0.0272685	19.4371		F (00)	2.10839	0.920502	0	0.669309	7.08907	10.7873		F	0.0823341
	P (00)	0.0163505	0.122323	0.0149906	18.6462	0.0119623	18.8118		P (00)	4.25069	31.8007	3.89716	0	3.10986	43.0584		P	0.110552
	O (00)	0.00104069	6.52706e-05	0.00889647	0.00518133	3.1443	3.15948		O (00)	0.270552	0.0169686	2.31284	1.34701	0	3.94737		O	0.980833
	All (00)	3.62427	55.0025	19.4878	18.6937	3.19178	100		All (00)	18.4286	32.9035	23.9788	12.3439	12.3452	100
							100								100
LS03	Conversion Matrix (in %)	S (06)	C (06)	F (06)	P (06)	O (06)	All (06)	LS03	Change Matrix (in %)	S (06)	C (06)	F (06)	P (06)	O (06)	All (06)
	S (00)	2.45052	6.75338e-05	0	0.00105893	0.000198486	2.45184		S (00)	0	0.0311054	0	0.487731	0.0914208	0.610257		S	0.792158
	C (00)	0.0406084	57.3052	0.021926	0.0119066	0.00358957	57.3832		C (00)	18.7038	0	10.0989	5.48408	1.65332	35.9401		C	0.0494934
	F (00)	0.000835038	0.00463183	14.9818	0.003041	0.0322749	15.0226		F (00)	0.38461	2.13338	0	1.40065	14.8655	18.7841		F	0.222454
	P (00)	0.014037	0.0192538	0.00370609	21.2257	0.0255517	21.2882		P (00)	6.46532	8.86812	1.70699	0	11.7689	28.8093		P	0.193691
	O (00)	0	0.000537366	0.0025577	0.0313309	3.81968	3.85411		O (00)	0	0.247505	1.17805	14.4307	0	15.8562		O	2.12933
	All (00)	2.506	57.3297	15.01	21.273	3.8813	100		All (00)	25.5537	11.2801	12.9839	21.8032	28.3791	100
							100								100
LS04	Conversion Matrix (in %)	S (06)	C (06)	F (06)	P (06)	O (06)	All (06)	LS04	Change Matrix (in %)	S (06)	C (06)	F (06)	P (06)	O (06)	All (06)
	S (00)	4.66082	0.00317336	0.00317917	0.00665306	0.00317125	4.677		S (00)	0	0.795268	0.796723	1.6673	0.794738	4.05403		S	0.413022
	C (00)	0.102334	60.187	0.0394918	0.0801132	0.00293819	60.4119		C (00)	25.6456	0	9.89692	20.0769	0.736332	56.3558		C	0.0359045
	F (00)	0.0131835	0.013009	19.1797	0.00320527	0.00246622	19.2115		F (00)	3.30389	3.26016	0	0.803264	0.618052	7.98537		F	0.0420451
	P (00)	0.0222302	0.0708499	0.0163274	13.5414	0.0123037	13.6631		P (00)	5.57106	17.7555	4.09176	0	3.08339	30.5017		P	0.108969
	O (00)	0.000128792	0.0003424	0.00220383	0.00172682	2.03206	2.03646		O (00)	0.0322762	0.0858079	0.552295	0.432754	0	1.10313		O	0.764841
	All (00)	4.79869	60.2744	19.2409	13.6331	2.05294	100		All (00)	34.5528	21.8967	15.3377	22.9803	5.23252	100
							100								100
LS05	Conversion Matrix (in %)	S (06)	C (06)	F (06)	P (06)	O (06)	All (06)	LS05	Change Matrix (in %)	S (06)	C (06)	F (06)	P (06)	O (06)	All (06)
	S (00)	4.79142	0.00846678	0.00214707	0.0093427	0.00153793	4.81292		S (00)	0	1.42178	0.360547	1.56887	0.258258	3.60946		S	0.468343
	C (00)	0.108565	61.2392	0.0124315	0.222542	0.00130703	61.584		C (00)	18.2308	0	2.08756	37.3703	0.219483	57.9081		C	0.0508618
	F (00)	0.0038627	0.0232717	11.7894	0.0161873	0.012143	11.8448		F (00)	0.648644	3.9079	0	2.71825	2.03911	9.3139		F	0.345615
	P (00)	0.0263057	0.109589	0.010182	20.4266	0.00882667	20.5815		P (00)	4.41739	18.4028	1.70981	0	1.48222	26.0122		P	0.172329
	O (00)	0.00443183	0	0.00106278	0.0133013	1.15796	1.17676		O (00)	0.744216	0	0.178467	2.23363	0	3.15631		O	1.48148
	All (00)	4.93459	61.3805	11.8152	20.6879	1.18178	100		All (00)	24.041	23.7325	4.33638	43.8911	3.99907	100
							100								100
LS06	Conversion Matrix (in %)	S (06)	C (06)	F (06)	P (06)	O (06)	All (06)	LS06	Change Matrix (in %)	S (06)	C (06)	F (06)	P (06)	O (06)	All (06)
	S (00)	4.05728	0.00120144	0.00255695	0.00333771	0.00576254	4.07014		S (00)	0	0.377009	0.802362	1.04736	1.80827	4.035		S	0.480769
	C (00)	0.0435931	39.1663	0.00911816	0.0683572	0.0134771	39.3008		C (00)	13.6794	0	2.86125	21.4503	4.22909	42.22		C	0.0668116
	F (00)	0.0115591	0.00291988	17.3349	0.00451564	0.0082869	17.3622		F (00)	3.62722	0.916248	0	1.41699	2.6004	8.56087		F	0.229562
	P (00)	0.0336046	0.0616883	0.0169855	34.4302	0.0255513	34.568		P (00)	10.545	19.3576	5.33001	0	8.01792	43.2506		P	0.092647
	O (00)	0.00371193	0	0.000152412	0.00229753	4.69267	4.69883		O (00)	1.16479	0	0.0478266	0.720959	0	1.93358		O	1.59624
	All (00)	4.14975	39.2321	17.3637	34.5087	4.74575	100		All (00)	29.0164	20.6508	9.04145	24.6356	16.6557	100
							100								100
LS07	Conversion Matrix (in %)	S (06)	C (06)	F (06)	P (06)	O (06)	All (06)	LS07	Change Matrix (in %)	S (06)	C (06)	F (06)	P (06)	O (06)	All (06)
	S (00)	1.97843	0	0	0.00367647	7.0164e-06	1.98211		S (00)	0	0	0	3.62554	0.0069192	3.63246		S	1.0354
	C (00)	0.0159902	26.99	0.00409917	0.00572222	0.000980264	27.0168		C (00)	15.7687	0	4.04238	5.64294	0.966683	26.4207		C	0.0603188
	F (00)	0.0029572	0.00113482	18.2308	0.00312181	0.000333	18.2384		F (00)	2.91623	1.11909	0	3.07856	0.328387	7.44227		F	0.0573074
	P (00)	0.00985317	0.0397155	0.00198225	31.5035	0.000383007	31.5554		P (00)	9.71667	39.1652	1.95479	0	0.377701	51.2144		P	0.0386441
	O (00)	0.00581735	0.00277962	0.000749593	0.00210224	21.1959	21.2073		O (00)	5.73676	2.74111	0.739208	2.07312	0	11.2902		O	0.0313084
	All (00)	2.01305	27.0336	18.2377	31.5181	21.1976	100		All (00)	34.1383	43.0255	6.73637	14.4202	1.67969	100
							100								100
LS08	Conversion Matrix (in %)	S (06)	C (06)	F (06)	P (06)	O (06)	All (06)	LS08	Change Matrix (in %)	S (06)	C (06)	F (06)	P (06)	O (06)	All (06)
	S (00)	3.15349	0.000326553	0.00146698	0.00212385	0.000725428	3.15813		S (00)	0	0.120319	0.540509	0.782536	0.267284	1.71065		S	0.960171
	C (00)	0.0541273	41.8535	0.0187754	0.0362415	0.00440308	41.9671		C (00)	19.9432	0	6.91781	13.3532	1.62232	41.8365		C	0.0458114
	F (00)	0.00606025	0.00460437	23.1161	0.00109712	0.00977621	23.1376		F (00)	2.2329	1.69648	0	0.404234	3.60205	7.93567		F	0.0843387
	P (00)	0.0241728	0.051937	0.0159517	24.4744	0.0140817	24.5805		P (00)	8.90649	19.1362	5.87742	0	5.1884	39.1085		P	0.108126
	O (00)	0.00179583	0.00464395	0.00907973	0.0100161	7.13111	7.15665		O (00)	0.661675	1.71107	3.34543	3.69043	0	9.4086		O	0.702869
	All (00)	3.23965	41.915	23.1614	24.5238	7.1601	100		All (00)	31.7443	22.6641	16.6812	18.2304	10.68	100
							100								100
LS09	Conversion Matrix (in %)	S (06)	C (06)	F (06)	P (06)	O (06)	All (06)	LS09	Change Matrix (in %)	S (06)	C (06)	F (06)	P (06)	O (06)	All (06)
	S (00)	5.93439	0.00200529	0.00375583	0.00825087	0.00232134	5.95072		S (00)	0	0.407451	0.763141	1.67648	0.47167	3.31874		S	0.396825
	C (00)	0.100393	48.301	0.0238062	0.1519	0.00334939	48.5804		C (00)	20.3986	0	4.83713	30.8642	0.680556	56.7805		C	0.0554262
	F (00)	0.0141629	0.0045726	22.7763	0.00644692	0.015926	22.8174		F (00)	2.87774	0.929098	0	1.30994	3.23598	8.35275		F	0.068306
	P (00)	0.0349452	0.0844138	0.0221537	20.3763	0.00874062	20.5265		P (00)	7.10046	17.1519	4.50137	0	1.77599	30.5297		P	0.15035
	O (00)	0.000243332	0.000378847	0.00364845	0.000741036	2.11987	2.12488		O (00)	0.0494422	0.0769773	0.741322	0.15057	0	1.01831		O	0.773205
	All (00)	6.08413	48.3924	22.8297	20.5436	2.15021	100		All (00)	30.4262	18.5654	10.843	34.0012	6.1642	100
							100								100
LS10	Conversion Matrix (in %)	S (06)	C (06)	F (06)	P (06)	O (06)	All (06)	LS10	Change Matrix (in %)	S (06)	C (06)	F (06)	P (06)	O (06)	All (06)
	S (00)	2.00048	0	0.00117832	0.00105922	0	2.00272		S (00)	0	0	0.821915	0.738843	0	1.56076		S	1.41542
	C (00)	0.0266832	18.3431	0.00170278	0.0228781	0	18.3944		C (00)	18.6124	0	1.18775	15.9583	0	35.7584		C	0.0838838
	F (00)	0.00533323	0.0126854	50.0573	0.00164355	0.0413458	50.1183		F (00)	3.72011	8.84848	0	1.14643	28.8401	42.5551		F	0.0235974
	P (00)	0.0124407	0.00537133	0.00618085	23.3089	0.00412307	23.337		P (00)	8.67781	3.74669	4.31135	0	2.87598	19.6118		P	0.0656197
	O (00)	0.000359287	0	0.000377344	0	6.14685	6.14759		O (00)	0.250615	0	0.26321	0	0	0.513825		O	2.10308
	All (00)	2.0453	18.3612	50.0667	23.3345	6.19232	100		All (00)	31.261	12.5952	6.58422	17.8435	31.7161	100
							100								100
LS11	Conversion Matrix (in %)	S (06)	C (06)	F (06)	P (06)	O (06)	All (06)	LS11	Change Matrix (in %)	S (06)	C (06)	F (06)	P (06)	O (06)	All (06)
	S (00)	2.38241	0.000410226	0.00165628	0.000995088	0.000256497	2.38572		S (00)	0	0.141857	0.572746	0.344104	0.0886972	1.1474		S	0.561798
	C (00)	0.025599	27.6755	0.0281936	0.0548238	0.000575378	27.7847		C (00)	8.85218	0	9.74943	18.9582	0.198967	37.7588		C	0.0610462
	F (00)	0.0122322	0.00884844	44.106	0.0138283	0.0153876	44.1563		F (00)	4.22991	3.05981	0	4.78186	5.32109	17.3927		F	0.0359916
	P (00)	0.0149442	0.0417537	0.0178778	22.2081	0.0164872	22.2992		P (00)	5.16774	14.4385	6.1822	0	5.70133	31.4898		P	0.0951931
	O (00)	0.000150898	0.00023271	0.0314208	0.0035087	3.33875	3.37406		O (00)	0.0521808	0.0804717	10.8654	1.21332	0	12.2113		O	0.831624
	All (00)	2.43533	27.7268	44.1852	22.2813	3.37146	100		All (00)	18.302	17.7207	27.3698	25.2975	11.3101	100
							100								100
LS12	Conversion Matrix (in %)	S (06)	C (06)	F (06)	P (06)	O (06)	All (06)	LS12	Change Matrix (in %)	S (06)	C (06)	F (06)	P (06)	O (06)	All (06)
	S (00)	4.3342	0.00132814	0.00156511	0.0064422	0.00111374	4.34465		S (00)	0	0.314793	0.370958	1.52691	0.263976	2.47664		S	0.366748
	C (00)	0.0614892	32.5699	0.0306439	0.119605	0.00165235	32.7833		C (00)	14.574	0	7.26314	28.3484	0.391636	50.5772		C	0.0560732
	F (00)	0.0225501	0.00836158	38.7075	0.00431846	0.0107885	38.7536		F (00)	5.34478	1.98184	0	1.02355	2.55705	10.9072		F	0.0330298
	P (00)	0.02413	0.0739475	0.0356025	21.6788	0.00972197	21.8222		P (00)	5.71924	17.5269	8.43842	0	2.30428	33.9888		P	0.112194
	O (00)	0.000738883	0.000144375	0.00394433	0.0038221	2.28763	2.29627		O (00)	0.175128	0.0342194	0.934876	0.905905	0	2.05013		O	0.858733
	All (00)	4.4431	32.6537	38.7793	21.813	2.3109	100		All (00)	25.8132	19.8577	17.0074	31.8048	5.51694	100
							100								100
LS13	Conversion Matrix (in %)	S (06)	C (06)	F (06)	P (06)	O (06)	All (06)	LS13	Change Matrix (in %)	S (06)	C (06)	F (06)	P (06)	O (06)	All (06)
	S (00)	1.97767	3.94548e-05	0.000795465	0.000742048	0.000923581	1.98017		S (00)	0	0.0186822	0.37666	0.351366	0.437324	1.18403		S	0.352113
	C (00)	0.00713034	7.10074	0.00309895	0.0294042	0.000387405	7.14076		C (00)	3.37628	0	1.46738	13.9232	0.18344	18.9503		C	0.180668
	F (00)	0.018502	0.00303385	69.2735	0.00517219	0.0145526	69.3148		F (00)	8.76089	1.43656	0	2.44908	6.89081	19.5373		F	0.0208861
	P (00)	0.00658858	0.0454125	0.0221355	15.1358	0.00757036	15.2175		P (00)	3.11975	21.5032	10.4814	0	3.58464	38.689		P	0.0976216
	O (00)	0.000615882	0	0.0439985	0.0010856	6.30109	6.34679		O (00)	0.291626	0	20.8337	0.514041	0	21.6394		O	1.73638
	All (00)	2.01051	7.14923	69.3436	15.1722	6.32452	100		All (00)	15.5485	22.9585	33.1591	17.2376	11.0962	100
							100								100
LS14	Conversion Matrix (in %)	S (06)	C (06)	F (06)	P (06)	O (06)	All (06)	LS14	Change Matrix (in %)	S (06)	C (06)	F (06)	P (06)	O (06)	All (06)
	S (00)	2.14921	0.000180684	0.00272382	0.00168664	0.000954322	2.15475		S (00)	0	0.09234	1.39203	0.861967	0.487713	2.83405		S	0.41816
	C (00)	0.0139429	10.1768	0.00642135	0.0361245	7.80915e-05	10.2333		C (00)	7.1256	0	3.28168	18.4617	0.0399092	28.9089		C	0.096475
	F (00)	0.0230801	0.00465298	60.5057	0.00692225	0.0166251	60.557		F (00)	11.7953	2.37794	0	3.53766	8.4964	26.2073		F	0.0137741
	P (00)	0.0125957	0.0191778	0.0246635	21.4074	0.00548574	21.4693		P (00)	6.43714	9.80097	12.6045	0	2.80353	31.6461		P	0.0640102
	O (00)	0.000422769	3.93377e-07	0.0149331	0.00500083	5.56522	5.58557		O (00)	0.216059	0.000201038	7.6317	2.55571	0	10.4037		O	0.672689
	All (00)	2.19925	10.2008	60.5545	21.4571	5.58836	100		All (00)	25.5741	12.2714	24.9099	25.4171	11.8276	100
							100								100
LS15	Conversion Matrix (in %)	S (06)	C (06)	F (06)	P (06)	O (06)	All (06)	LS15	Change Matrix (in %)	S (06)	C (06)	F (06)	P (06)	O (06)	All (06)
	S (00)	2.46609	0.000563366	0.00364466	0.00323366	0.00103703	2.47456		S (00)	0	0.235643	1.52448	1.35257	0.433765	3.54645		S	0.540652
	C (00)	0.0190651	13.0803	0.011932	0.0423042	0.000695202	13.1543		C (00)	7.97449	0	4.9909	17.6949	0.290787	30.9511		C	0.102193
	F (00)	0.0286543	0.00448873	46.5099	0.00476478	0.0116529	46.5595		F (00)	11.9854	1.87754	0	1.993	4.87415	20.7301		F	0.0230787
	P (00)	0.0169141	0.0391658	0.0288185	28.1868	0.00735838	28.279		P (00)	7.07478	16.3821	12.0541	0	3.07784	38.5889		P	0.0632425
	O (00)	0.000472633	0.000133755	0.00541505	0.00876168	9.51785	9.53263		O (00)	0.197692	0.0559467	2.26499	3.66481	0	6.18344		O	0.777767
	All (00)	2.53119	13.1246	46.5597	28.2458	9.53859	100		All (00)	27.2324	18.5513	20.8345	24.7053	8.67655	100
							100								100
LS16	Conversion Matrix (in %)	S (06)	C (06)	F (06)	P (06)	O (06)	All (06)	LS16	Change Matrix (in %)	S (06)	C (06)	F (06)	P (06)	O (06)	All (06)
	S (00)	0.962101	0	0	0.000401547	0.0020861	0.964589		S (00)	0	0	0	0.350311	1.81992	2.17023		S	1.70455
	C (00)	0.00536684	10.5097	0	0.000452377	0.000699651	10.5162		C (00)	4.68205	0	0	0.394655	0.610378	5.68709		C	0.0376429
	F (00)	0.00243188	0.000125366	14.0828	0.00209469	0.00805463	14.0955		F (00)	2.12158	0.109369	0	1.82741	7.02688	11.0852		F	0.0712624
	P (00)	0.0187182	0.00592718	0.00269424	30.3964	0.0463699	30.4701		P (00)	16.3298	5.17089	2.35047	0	40.4532	64.3044		P	0.0370256
	O (00)	0.00219978	0.000213718	0.000674772	0.016115	43.9344	43.9536		O (00)	1.9191	0.186448	0.588674	14.0588	0	16.753		O	0.0608366
	All (00)	0.990818	10.516	14.0862	30.4155	43.9916	100		All (00)	25.0526	5.46671	2.93914	16.6312	49.9104	100
							100								100
LS17	Conversion Matrix (in %)	S (06)	C (06)	F (06)	P (06)	O (06)	All (06)	LS17	Change Matrix (in %)	S (06)	C (06)	F (06)	P (06)	O (06)	All (06)
	S (00)	2.24987	0.000169031	0.0076412	0.00377077	0.00411884	2.26557		S (00)	0	0.107513	4.86023	2.39842	2.61981	9.98597		S	1.09278
	C (00)	0.0310575	11.5571	0.00117739	0.0195253	0	11.6088		C (00)	19.7543	0	0.748884	12.4192	0	32.9224		C	0.179712
	F (00)	0.00964626	0	17.0032	0.00383056	0	17.0167		F (00)	6.13556	0	0	2.43645	0	8.57201		F	0.285474
	P (00)	0.0157077	0.0300698	0.0128808	36.5681	0.00506677	36.6319		P (00)	9.99096	19.1261	8.19293	0	3.22275	40.5327		P	0.129072
	O (00)	0.00209065	0	0.00332193	0.00714437	32.4645	32.4771		O (00)	1.32977	0	2.11294	4.54422	0	7.98692		O	0.330033
	All (00)	2.30837	11.5873	17.0282	36.6024	32.4737	100		All (00)	37.2106	19.2336	15.915	21.7983	5.84256	100
							100								100
LS18	Conversion Matrix (in %)	S (06)	C (06)	F (06)	P (06)	O (06)	All (06)	LS18	Change Matrix (in %)	S (06)	C (06)	F (06)	P (06)	O (06)	All (06)
	S (00)	3.17762	0.000155623	0.000595368	0.0015046	0.000173025	3.18005		S (00)	0	0.0558043	0.213491	0.53953	0.0620445	0.87087		S	0.646923
	C (00)	0.0318912	20.8953	0.00397583	0.0318271	0.00168219	20.9647		C (00)	11.4358	0	1.42568	11.4128	0.603211	24.8775		C	0.0719441
	F (00)	0.0122017	0.00161441	31.1682	0.0071357	0.0132343	31.2024		F (00)	4.37537	0.578908	0	2.55877	4.74564	12.2587		F	0.0669578
	P (00)	0.0254242	0.0302924	0.0274632	31.6743	0.0301005	31.7876		P (00)	9.11679	10.8625	9.84794	0	10.7937	40.6208		P	0.0925926
	O (00)	0.000846493	0.00108847	0.0426819	0.0149841	12.8057	12.8653		O (00)	0.303542	0.390313	15.3052	5.3731	0	21.3721		O	1.0822
	All (00)	3.24799	20.9285	31.2429	31.7298	12.8509	100		All (00)	25.2315	11.8875	26.7923	19.8842	16.2046	100
							100								100
LS19	Conversion Matrix (in %)	S (06)	C (06)	F (06)	P (06)	O (06)	All (06)	LS19	Change Matrix (in %)	S (06)	C (06)	F (06)	P (06)	O (06)	All (06)
	S (00)	2.67071	0.000153786	0.00418652	0.0370401	0.00293636	2.71503		S (00)	0	0.0353537	0.962436	8.51511	0.675039	10.1879		S	0.646019
	C (00)	0.0331204	18.9634	0.00658919	0.0389966	0.0282657	19.0704		C (00)	7.61402	0	1.51479	8.96491	6.49799	24.5917		C	0.265957
	F (00)	0.00951	0.00259713	24.1693	0.00549624	0.0162597	24.2032		F (00)	2.18625	0.597053	0	1.26353	3.73792	7.78475		F	0.253117
	P (00)	0.0422184	0.0637977	0.0456399	48.4614	0.0665217	48.6796		P (00)	9.70556	14.6664	10.4921	0	15.2926	50.1567		P	0.0825259
	O (00)	0.00104327	0	0.00470767	0.0259116	5.30017	5.33183		O (00)	0.239836	0	1.08224	5.9568	0	7.27888		O	2.41407
	All (00)	2.7566	19.03	24.2305	48.5688	5.41415	100		All (00)	19.7457	15.2988	14.0516	24.7004	26.2036	100
							100								100
LS20	Conversion Matrix (in %)	S (06)	C (06)	F (06)	P (06)	O (06)	All (06)	LS20	Change Matrix (in %)	S (06)	C (06)	F (06)	P (06)	O (06)	All (06)
	S (00)	0.829649	0	0	0	0	0.829649		S (00)	0	0	0	0	0	0		S	4.26621
	C (00)	0	1.92088	0	0	0	1.92088		C (00)	0	0	0	0	0	0		C
	F (00)	0.000337247	0	2.2388	0	0	2.23914		F (00)	1.01848	0	0	0	0	1.01848		F
	P (00)	0.00326823	0.00332153	0	20.1563	0.0180081	20.1809		P (00)	9.87	10.031	0	0	54.3842	74.2852		P	0.119303
	O (00)	0	0	0	0.00817763	74.8212	74.8294		O (00)	0	0	0	24.6963	0	24.6963		O	0.0440917
	All (00)	0.833255	1.9242	2.2388	20.1645	74.8392	100		All (00)	10.8885	10.031	0	24.6963	54.3842	100
							100								100
LS21	Conversion Matrix (in %)	S (06)	C (06)	F (06)	P (06)	O (06)	All (06)	LS21	Change Matrix (in %)	S (06)	C (06)	F (06)	P (06)	O (06)	All (06)
	S (00)	1.27849	0.000866415	0	6.00736e-05	0	1.27941		S (00)	0	0.793955	0	0.0550495	0	0.849004		S	0.865209
	C (00)	0.0101388	17.5301	0	0.0112181	0	17.5514		C (00)	9.29084	0	0	10.2799	0	19.5707		C	0.0978953
	F (00)	0.000666139	0	6.3464	0.00480569	0	6.35187		F (00)	0.610428	0	0	4.40378	0	5.01421		F
	P (00)	0.021419	0.0240022	0.0114919	22.7393	0.000459787	22.7967		P (00)	19.6277	21.9949	10.5308	0	0.421334	52.5747		P	0.153752
	O (00)	0.0191615	0.00303754	0.00122672	0.000572637	51.9966	52.0206		O (00)	17.559	2.7835	1.12412	0.524746	0	21.9914		O	0.0229746
	All (00)	1.32987	17.558	6.35911	22.756	51.9971	100		All (00)	47.0879	25.5723	11.6549	15.2634	0.421334	100
							100								100
LS22	Conversion Matrix (in %)	S (06)	C (06)	F (06)	P (06)	O (06)	All (06)	LS22	Change Matrix (in %)	S (06)	C (06)	F (06)	P (06)	O (06)	All (06)
	S (00)	11.7522	0.00261131	0.00603426	0.0104984	0.00236245	11.7737		S (00)	0	0.559497	1.2929	2.24939	0.506176	4.60796		S	0.305783
	C (00)	0.153095	43.1262	0.0168438	0.062159	0.00303714	43.3614		C (00)	32.8021	0	3.60894	13.3181	0.650737	50.3799		C	0.0749846
	F (00)	0.0280081	0.00542057	23.2174	0.00294452	0.0121484	23.2659		F (00)	6.001	1.16141	0	0.630891	2.60292	10.3962		F	0.06522
	P (00)	0.0693445	0.0431981	0.0148005	17.1874	0.00867904	17.3234		P (00)	14.8577	9.2556	3.17115	0	1.85957	29.144		P	0.14222
	O (00)	0.00275161	0.000267288	0.0175158	0.00500367	4.2501	4.27564		O (00)	0.589558	0.057269	3.75293	1.07208	0	5.47185		O	0.620967
	All (00)	12.0054	43.1777	23.2726	17.268	4.27633	100		All (00)	54.2504	11.0338	11.8259	17.2705	5.6194	100
							100								100
LS23	Conversion Matrix (in %)	S (06)	C (06)	F (06)	P (06)	O (06)	All (06)	LS23	Change Matrix (in %)	S (06)	C (06)	F (06)	P (06)	O (06)	All (06)
	S (00)	27.8783	0.00771907	0.00959552	0.025095	0.00665057	27.9274		S (00)	0	1.14921	1.42857	3.73611	0.99013	7.30402		S	0.236538
	C (00)	0.28913	38.6751	0.0126462	0.0638412	0.00282758	39.0436		C (00)	43.0453	0	1.88275	9.50461	0.420967	54.8536		C	0.153234
	F (00)	0.0317029	0.00446132	16.3943	0.00481412	0.00600195	16.4412		F (00)	4.7199	0.664197	0	0.716721	0.893564	6.99438		F	0.149833
	P (00)	0.114514	0.0288955	0.0189475	12.7857	0.016112	12.9642		P (00)	17.0487	4.30193	2.82088	0	2.39873	26.5703		P	0.296793
	O (00)	0.00752621	0.00048884	0.0150046	0.00571308	3.59487	3.62361		O (00)	1.12049	0.072778	2.23387	0.850557	0	4.2777		O	0.641461
	All (00)	28.3212	38.7167	16.4504	12.8852	3.62647	100		All (00)	65.9344	6.18811	8.36607	14.808	4.70339	100
							100								100

## Sheet: RCMRD_Botswana_00_10
24 Land Systems classification		WGT_AVG (temporarely normalized)	WGT_AVG	WGT_AVG	WGT_AVG	WGT_AVG
No PP LS Code	Land system name	settlement	cropland	forest	pasture	other land			Total area LS Urb.	Total area LS Crop	Total area LS Forest	Total area LS Grassland	Total area LS Other
0	Cropland; extensive with few livestock
1	Cropland; extensive with bovines, goats & sheep
2	Cropland; medium intensive with few livestock
3	Cropland; medium intensive with bovines, goats & sheep
4	Cropland; intensive with few livestock
5	Cropland; intensive with bovines, goats & sheep
6	Mosaic cropland and grassland with bovines, goats & sheep
7	Mosaic cropland (extensive) and grassland with few livestock	1098.15	385.532	180.834	187.702	100			2.8918e+09	2.8918e+09	2.8918e+09	2.8918e+09	2.8918e+09
8	Mosaic cropland (medium intensive) and grassland with few livestock
9	Mosaic cropland (intensive) and grassland with few livestock
10	Mosaic cropland (extensive) and forest with few livestock		100.205	150.106	143.392	109.85				1.88167e+07	1.88167e+07	1.88167e+07	1.88167e+07
11	Mosaic cropland (medium intensive) and forest with few livestock
12	Mosaic cropland (intensive) and forest with few livestock
13	Dense forest
14	Open forest with few livestock			174.53	174.069	108.696					2.38566e+08	2.38566e+08	2.38566e+08
15	Mosaic grassland and forest	352.502	441.011	445.984	431.297	109.124			4.06817e+10	4.06817e+10	4.06817e+10	4.06817e+10	4.06817e+10
16	Mosaic grassland and bare	461.734	580.124	237.627	363.77	184.164			1.58589e+11	1.58589e+11	1.58589e+11	1.58589e+11	1.58589e+11
17	Natural grassland	100	213.722	168.142	215.83	177.997			2.20756e+10	2.20756e+10	2.20756e+10	2.20756e+10	2.20756e+10
18	Grassland with few livestock	249.639	345.407	407.874	458.033	175.839			3.09811e+11	3.09811e+11	3.09811e+11	3.09811e+11	3.09811e+11
19	Grassland with bovines, goats and sheep	108.914	732.952	184.537	422.937				8.5443e+07	8.5443e+07	8.5443e+07	8.5443e+07
20	Bare	100	100	100	258.448	379.132			3.76912e+10	3.76912e+10	3.76912e+10	3.76912e+10	3.76912e+10
21	Bare with few livestock	249.097	105.714	117.635	185.951	175.387			7.47007e+09	7.47007e+09	7.47007e+09	7.47007e+09	7.47007e+09
22	Peri-urban & villages	543.202	311.46	755.983	395.565	100			1.30063e+09	1.30063e+09	1.30063e+09	1.30063e+09	1.30063e+09
23	Urban	222.271	287.971	185.176	195.433				1.71146e+08	1.71146e+08	1.71146e+08	1.71146e+08
								SUM	5.80767e+11	5.80786e+11	5.81025e+11	5.81025e+11	5.80768e+11
																		Net change fraction of total change per class
LS00								LS00										MED
																	S
																	C
																	F
																	P
																	O
LS01								LS01
																	S
																	C
																	F
																	P
																	O
LS02								LS02
																	S
																	C
																	F
																	P
																	O
LS03								LS03
																	S
																	C
																	F
																	P
																	O
LS04								LS04
																	S
																	C
																	F
																	P
																	O
LS05								LS05
																	S
																	C
																	F
																	P
																	O
LS06								LS06
																	S
																	C
																	F
																	P
																	O
LS07	Conversion Matrix (in %)	S (06)	C (06)	F (06)	P (06)	O (06)	All (06)	LS07	Change Matrix (in %)	S (06)	C (06)	F (06)	P (06)	O (06)	All (06)
	S (00)	0.26895	0.00234554	0.00979017	0.0331963	0.00209645	0.316378		S (00)	0	0.0140992	0.0588494	0.199545	0.0126019	0.285096		S
	C (00)	0.00154929	0.164238	0.019446	0.734795	0.0112039	0.931232		C (00)	0.00931287	0	0.116891	4.41691	0.0673476	4.61046		C
	F (00)	0	0.0785801	1.24376	4.38349	0	5.70583		F (00)	0	0.47235	0	26.3495	0	26.8218		F
	P (00)	0.0375455	2.00592	8.05912	81.6871	0.339232	92.1289		P (00)	0.225688	12.0577	48.4439	0	2.03915	62.7665		P
	O (00)	0	0	0.00223549	0.915432	0	0.917667		O (00)	0	0	0.0134377	5.50272	0	5.51616		O
	All (00)	0.308044	2.25108	9.33435	87.754	0.352533	100		All (00)	0.235001	12.5442	48.6331	36.4686	2.1191	100
							100								100
LS08								LS08
																	S
																	C
																	F
																	P
																	O
LS09								LS09
																	S
																	C
																	F
																	P
																	O
LS10	Conversion Matrix (in %)	S (06)	C (06)	F (06)	P (06)	O (06)	All (06)	LS10	Change Matrix (in %)	S (06)	C (06)	F (06)	P (06)	O (06)	All (06)
	S (00)	0	0	0	0	0	0		S (00)	0	0	0	0	0	0		S
	C (00)	0	0	1.74745	8.50745	0.176348	10.4313		C (00)	0	0	3.08753	15.0316	0.311585	18.4307		C
	F (00)	0	0	0.577139	37.7705	0	38.3477		F (00)	0	0	0	66.7359	0	66.7359		F
	P (00)	0	0.0106878	5.81948	42.8258	2.44215	51.0982		P (00)	0	0.018884	10.2823	0	4.31498	14.6162		P
	O (00)	0	0	0	0.122909	0	0.122909		O (00)	0	0	0	0.217166	0	0.217166		O
	All (00)	0	0.0106878	8.14407	89.2267	2.6185	100		All (00)	0	0.018884	13.3698	81.9847	4.62657	100
							100								100
LS11								LS11
																	S
																	C
																	F
																	P
																	O
LS12								LS12
																	S
																	C
																	F
																	P
																	O
LS13								LS13
																	S
																	C
																	F
																	P
																	O
LS14	Conversion Matrix (in %)	S (06)	C (06)	F (06)	P (06)	O (06)	All (06)	LS14	Change Matrix (in %)	S (06)	C (06)	F (06)	P (06)	O (06)	All (06)
	S (00)	0	0	0	0	0	0		S (00)	0	0	0	0	0	0		S
	C (00)	0	0.00233305	0.000212095	0.0182402	0	0.0207853		C (00)	0	0	0.00504558	0.43392	0	0.438966		C
	F (00)	0	0	0	0	0	0		F (00)	0	0	0	0	0	0		F
	P (00)	0	0.0279966	4.03815	95.7941	0.118986	99.9792		P (00)	0	0.666017	96.0644	0	2.83057	99.561		P
	O (00)	0	0	0	0	0	0		O (00)	0	0	0	0	0	0		O
	All (00)	0	0.0303296	4.03836	95.8123	0.118986	100		All (00)	0	0.666017	96.0695	0.43392	2.83057	100
							100								100
LS15	Conversion Matrix (in %)	S (06)	C (06)	F (06)	P (06)	O (06)	All (06)	LS15	Change Matrix (in %)	S (06)	C (06)	F (06)	P (06)	O (06)	All (06)
	S (00)	0.0592423	0.00121742	0.00154498	0.00737025	0.00076871	0.0701436		S (00)	0	0.00455251	0.00577743	0.0275609	0.00287458	0.0407654		S
	C (00)	0.0275413	0.586448	0.0195807	0.512782	0.0574816	1.20383		C (00)	0.10299	0	0.0732215	1.91754	0.214951	2.3087		C
	F (00)	0.00178255	0.0202962	6.45722	10.2896	0.0605692	16.8295		F (00)	0.00666583	0.0758971	0	38.4777	0.226497	38.7868		F
	P (00)	0.0450888	0.769666	14.298	66.1468	0.587447	81.847		P (00)	0.168609	2.87815	53.4672	0	2.19675	58.7107		P
	O (00)	8.67185e-05	0.000539707	0.0110646	0.0292178	0.00862208	0.0495309		O (00)	0.000324282	0.00201822	0.0413757	0.10926	0	0.152978		O
	All (00)	0.133742	1.37817	20.7874	76.9858	0.714888	100		All (00)	0.278589	2.96062	53.5876	40.5321	2.64107	100
							100								100
LS16	Conversion Matrix (in %)	S (06)	C (06)	F (06)	P (06)	O (06)	All (06)	LS16	Change Matrix (in %)	S (06)	C (06)	F (06)	P (06)	O (06)	All (06)
	S (00)	0.133186	0.049909	0.00439722	0.154446	0.0237993	0.365737		S (00)	0	0.682118	0.0600978	2.11084	0.32527	3.17833		S
	C (00)	0.0173584	0.495286	0.0147871	0.656359	0.0854955	1.26929		C (00)	0.237241	0	0.202099	8.97062	1.16849	10.5784		C
	F (00)	5.67344e-05	0.00639027	0.224854	0.641023	0.0126127	0.884937		F (00)	0.000775403	0.0873374	0	8.76102	0.17238	9.02151		F
	P (00)	0.0130471	0.642785	1.4533	91.724	2.78221	96.6153		P (00)	0.178318	8.78509	19.8626	0	38.0251	66.8512		P
	O (00)	0.000230084	9.27273e-05	0.000845182	0.757618	0.105953	0.864739		O (00)	0.00314462	0.00126733	0.0115513	10.3546	0	10.3705		O
	All (00)	0.163878	1.19446	1.69819	93.9334	3.01007	100		All (00)	0.419479	9.55582	20.1364	30.197	39.6913	100
							100								100
LS17	Conversion Matrix (in %)	S (06)	C (06)	F (06)	P (06)	O (06)	All (06)	LS17	Change Matrix (in %)	S (06)	C (06)	F (06)	P (06)	O (06)	All (06)
	S (00)	0	0	0	0	0	0		S (00)	0	0	0	0	0	0		S
	C (00)	0	0.0750778	0.0290218	0.141052	0.00380812	0.248959		C (00)	0	0	0.228803	1.11203	0.0300227	1.37086		C
	F (00)	0	0.00796416	0.939891	2.4386	0.0283476	3.4148		F (00)	0	0.0627883	0	19.2255	0.223489	19.5118		F
	P (00)	1.00203e-05	0.0541928	5.71832	86.2871	4.20349	96.2631		P (00)	7.89984e-05	0.427248	45.0824	0	33.1397	78.6495		P
	O (00)	0	0.00146035	0.00846653	0.049414	0.0138123	0.0731532		O (00)	0	0.0115132	0.0667489	0.389573	0	0.467835		O
	All (00)	1.00203e-05	0.138695	6.6957	88.9161	4.24946	100		All (00)	7.89984e-05	0.501549	45.378	20.7271	33.3932	100
							100								100
LS18	Conversion Matrix (in %)	S (06)	C (06)	F (06)	P (06)	O (06)	All (06)	LS18	Change Matrix (in %)	S (06)	C (06)	F (06)	P (06)	O (06)	All (06)
	S (00)	0.150707	0.00541421	0.00317137	0.0260282	0.000550045	0.185871		S (00)	0	0.0349341	0.0204626	0.167941	0.00354905	0.226887		S
	C (00)	0.0431363	0.704182	0.0233517	0.587672	0.0378182	1.39616		C (00)	0.278328	0	0.150672	3.79183	0.244014	4.46484		C
	F (00)	0.0033863	0.0101746	2.11838	4.3591	0.043247	6.5343		F (00)	0.0218494	0.0656494	0	28.1262	0.279042	28.4927		F
	P (00)	0.089384	0.953584	6.88416	81.5084	2.28477	91.7203		P (00)	0.576732	6.1528	44.4186	0	14.742	65.8901		P
	O (00)	0.000214229	0.000466109	0.00575547	0.136991	0.0199834	0.16341		O (00)	0.00138227	0.00300747	0.037136	0.883906	0	0.925432		O
	All (00)	0.286828	1.67382	9.03482	86.6182	2.38637	100		All (00)	0.878291	6.25639	44.6268	32.9699	15.2686	100
							100								100
LS19	Conversion Matrix (in %)	S (06)	C (06)	F (06)	P (06)	O (06)	All (06)	LS19	Change Matrix (in %)	S (06)	C (06)	F (06)	P (06)	O (06)	All (06)
	S (00)	1.51109	0	0	0.0458975	0	1.55698		S (00)	0	0	0	0.230592	0	0.230592		S
	C (00)	0.129454	1.54286	0.0176529	5.4159	0	7.10587		C (00)	0.650387	0	0.0886892	27.2098	0	27.9489		C
	F (00)	0	0.0317752	1.16627	2.06892	0	3.26696		F (00)	0	0.159641	0	10.3944	0	10.554		F
	P (00)	0.946194	4.1955	7.05291	75.8756	0	88.0702		P (00)	4.75374	21.0785	35.4343	0	0	61.2665		P
	O (00)	0	0	0	0	0	0		O (00)	0	0	0	0	0	0		O
	All (00)	2.58673	5.77014	8.23683	83.4063	0	100		All (00)	5.40413	21.2381	35.523	37.8348	0	100
							100								100
LS20	Conversion Matrix (in %)	S (06)	C (06)	F (06)	P (06)	O (06)	All (06)	LS20	Change Matrix (in %)	S (06)	C (06)	F (06)	P (06)	O (06)	All (06)
	S (00)	0	0	0	0	0	0		S (00)	0	0	0	0	0	0		S
	C (00)	0	0	0	1.80201e-05	0.000117131	0.000135151		C (00)	0	0	0	0.000118577	0.00077075	0.000889327		C
	F (00)	4.30245e-05	0	0	0.265734	0.00840966	0.274187		F (00)	0.000283113	0	0	1.7486	0.0553378	1.80422		F
	P (00)	0.126752	0	0.0675028	83.0197	5.31778	88.5318		P (00)	0.834065	0	0.444186	0	34.9924	36.2707		P
	O (00)	0.00366959	0	0.00982243	9.3971	1.78332	11.1939		O (00)	0.0241469	0	0.0646343	61.8354	0	61.9242		O
	All (00)	0.130465	0	0.0773252	92.6826	7.10963	100		All (00)	0.858495	0	0.508821	63.5842	35.0485	100
							100								100
LS21	Conversion Matrix (in %)	S (06)	C (06)	F (06)	P (06)	O (06)	All (06)	LS21	Change Matrix (in %)	S (06)	C (06)	F (06)	P (06)	O (06)	All (06)
	S (00)	0.00122665	0	0	0.0739285	0.00323954	0.0783947		S (00)	0	0	0	0.495771	0.0217247	0.517496		S
	C (00)	0	0	0	0	1.4627e-05	1.4627e-05		C (00)	0	0	0	0	9.80902e-05	9.80902e-05		C
	F (00)	0	0	0.000198605	0.285072	0.00711748	0.292388		F (00)	0	0	0	1.91172	0.0477304	1.95945		F
	P (00)	0.00286141	0.000526574	0.662337	82.0569	4.13797	86.8605		P (00)	0.0191889	0.00353125	4.44169	0	27.7496	32.214		P
	O (00)	0.00701459	0	0.00747445	9.72427	3.02989	12.7687		O (00)	0.0470404	0	0.0501243	65.2118	0	65.309		O
	All (00)	0.0111026	0.000526574	0.67001	92.1401	7.17823	100		All (00)	0.0662293	0.00353125	4.49182	67.6193	27.8191	100
							100								100
LS22	Conversion Matrix (in %)	S (06)	C (06)	F (06)	P (06)	O (06)	All (06)	LS22	Change Matrix (in %)	S (06)	C (06)	F (06)	P (06)	O (06)	All (06)
	S (00)	6.91831	0.0570823	0.17079	0.857118	0.0473035	8.0506		S (00)	0	0.192196	0.575051	2.88592	0.159271	3.81243		S
	C (00)	0.301547	0.664918	0.0802023	2.78734	0.509671	4.34367		C (00)	1.01531	0	0.270041	9.38496	1.71606	12.3864		C
	F (00)	0.121259	0.0802684	5.67796	9.31887	0.0700048	15.2684		F (00)	0.408281	0.270264	0	31.3766	0.235706	32.2909		F
	P (00)	2.33425	1.16284	10.2645	57.0388	1.53701	72.3374		P (00)	7.85941	3.91529	34.5605	0	5.1751	51.5103		P
	O (00)	0	0	0	0	0	0		O (00)	0	0	0	0	0	0		O
	All (00)	9.67536	1.96511	16.1934	70.0021	2.16399	100		All (00)	9.283	4.37775	35.4056	43.6475	7.28614	100
							100								100
LS23	Conversion Matrix (in %)	S (06)	C (06)	F (06)	P (06)	O (06)	All (06)	LS23	Change Matrix (in %)	S (06)	C (06)	F (06)	P (06)	O (06)	All (06)
	S (00)	15.4995	0.125667	0.465494	1.51294	0	17.6036		S (00)	0	0.348857	1.29223	4.19998	0	5.84107		S
	C (00)	0.10999	0.023028	0.117259	0.826682	0	1.07696		C (00)	0.305336	0	0.325515	2.2949	0	2.92575		C
	F (00)	0.323708	0.0305943	5.5263	4.23101	0	10.1116		F (00)	0.898626	0.0849311	0	11.7455	0	12.729		F
	P (00)	3.71792	0.281584	24.2797	42.9287	0	71.2079		P (00)	10.3211	0.78169	67.4014	0	0	78.5042		P
	O (00)	0	0	0	0	0	0		O (00)	0	0	0	0	0	0		O
	All (00)	19.6511	0.460874	30.3887	49.4993	0	100		All (00)	11.5251	1.21548	69.0191	18.2403	0	100
							100								100

## Sheet: RCMRD_Ethiopia_03_08
24 Land Systems classification		WGT_AVG (temporarely normalized)	WGT_AVG	WGT_AVG	WGT_AVG	WGT_AVG
No PP LS Code	Land system name	settlement	cropland	forest	pasture	other land			Total area LS Urb	Total area LS Crop	Total area LS Forest	Total area LS Grassland	Total area LS Other
0	Cropland; extensive with few livestock	143.092	426.996	366.621	534.855	271.523			3.42825e+09	3.42825e+09	3.42825e+09	3.42825e+09	3.42825e+09
1	Cropland; extensive with bovines, goats & sheep	165.346	470.64	160.471	723.736	938.284			4.01945e+09	4.01945e+09	4.01945e+09	4.01945e+09	4.01945e+09
2	Cropland; medium intensive with few livestock	220.303	486.051	432.362	594.462	137.32			1.36915e+09	1.36915e+09	1.36915e+09	1.36915e+09	1.36915e+09
3	Cropland; medium intensive with bovines, goats & sheep
4	Cropland; intensive with few livestock
5	Cropland; intensive with bovines, goats & sheep
6	Mosaic cropland and grassland with bovines, goats & sheep	424.75	618.843	320.816	869.3	930.512			7.4758e+10	7.4758e+10	7.4758e+10	7.4758e+10	7.4758e+10
7	Mosaic cropland (extensive) and grassland with few livestock	215.693	546.919	543.047	726.341	365.993			6.20916e+10	6.20916e+10	6.20916e+10	6.20916e+10	6.20916e+10
8	Mosaic cropland (medium intensive) and grassland with few livestock	206.954	765.24	413.973	734.704	250.749			2.06043e+10	2.06043e+10	2.06043e+10	2.06043e+10	2.06043e+10
9	Mosaic cropland (intensive) and grassland with few livestock
10	Mosaic cropland (extensive) and forest with few livestock	170.169	955.016	294.574	541.616	266.397			1.57741e+10	1.57741e+10	1.57741e+10	1.57741e+10	1.57741e+10
11	Mosaic cropland (medium intensive) and forest with few livestock	277.089	637.165	295.851	749.965	204.405			1.43738e+10	1.43738e+10	1.43738e+10	1.43738e+10	1.43738e+10
12	Mosaic cropland (intensive) and forest with few livestock
13	Dense forest	153.659	519.208	637.899	689.062	118.792			1.27501e+10	1.27501e+10	1.27501e+10	1.27501e+10	1.27501e+10
14	Open forest with few livestock	152.984	782.084	587.863	484.896	164.97			6.43257e+10	6.43257e+10	6.43257e+10	6.43257e+10	6.43257e+10
15	Mosaic grassland and forest	224.015	1191.33	621.56	758.41	345.991			2.23083e+11	2.23083e+11	2.23083e+11	2.23083e+11	2.23083e+11
16	Mosaic grassland and bare	334.788	340.156	283.942	934.359	356.201			1.72624e+11	1.72624e+11	1.72624e+11	1.72624e+11	1.72624e+11
17	Natural grassland	100	213.722	168.142	215.83	177.997			2.20756e+10	2.20756e+10	2.20756e+10	2.20756e+10	2.20756e+10
18	Grassland with few livestock	249.639	345.407	407.874	458.033	175.839			3.09811e+11	3.09811e+11	3.09811e+11	3.09811e+11	3.09811e+11
19	Grassland with bovines, goats and sheep	108.914	732.952	184.537	422.937				8.5443e+07	8.5443e+07	8.5443e+07	8.5443e+07
20	Bare	100	100	100	258.448	379.132			3.76912e+10	3.76912e+10	3.76912e+10	3.76912e+10	3.76912e+10
21	Bare with few livestock	249.097	105.714	117.635	185.951	175.387			7.47007e+09	7.47007e+09	7.47007e+09	7.47007e+09	7.47007e+09
22	Peri-urban & villages	583.493	311.46	796.939	414.035	100			1.30063e+09	1.30063e+09	1.30063e+09	1.30063e+09	1.30063e+09
23	Urban	222.271	287.971	185.176	195.433				1.71146e+08	1.71146e+08	1.71146e+08	1.71146e+08
								SUM	1.04781e+12	1.04781e+12	1.04781e+12	1.04781e+12	1.04755e+12
																		Net change fraction of total change per class
LS00	Conversion Matrix (in %)	S (06)	C (06)	F (06)	P (06)	O (06)	All (06)	LS00	Change Matrix (in %)	S (06)	C (06)	F (06)	P (06)	O (06)	All (06)			MED (normalized)
	S (00)	0.0988188	4.85626e-05	0.000441598	0.00113286	0	0.100442		S (00)	0	0.000121193	0.00110205	0.00282716	0	0.0040504		S
	C (00)	0.0114378	9.83209	2.5923	12.3148	0.599421	25.3501		C (00)	0.0285441	0	6.46934	30.7328	1.49591	38.7266		C	10.6352
	F (00)	0.000796449	0.444683	2.89793	3.08006	0.0141883	6.43765		F (00)	0.00198762	1.10975	0	7.68659	0.0354083	8.83374		F	16.431
	P (00)	0.00481884	5.97389	4.16153	44.8009	5.34798	60.2891		P (00)	0.0120259	14.9084	10.3855	0	13.3464	38.6523		P	3.78869
	O (00)	0.00124977	0.183933	0.0457637	5.29208	2.29971	7.82273		O (00)	0.00311892	0.459023	0.114208	13.2069	0	13.7832		O	16.125
	All (00)	0.117122	16.4346	9.69796	65.489	8.26129	100		All (00)	0.0456765	16.4773	16.9701	51.6291	14.8777	100
							100								100
LS01	Conversion Matrix (in %)	S (06)	C (06)	F (06)	P (06)	O (06)	All (06)	LS01	Change Matrix (in %)	S (06)	C (06)	F (06)	P (06)	O (06)	All (06)
	S (00)	0.27424	0.0104098	0.00168559	0.0473088	0.000656168	0.3343		S (00)	0	0.025271	0.00409195	0.114847	0.00159292	0.145803		S	7.11522
	C (00)	0.0683988	26.8968	3.0473	12.3849	0.314971	42.7123		C (00)	0.166045	0	7.39763	30.0656	0.764626	38.3939		C	4.53574
	F (00)	0.00850549	0.77971	1.97223	2.94048	0.0228633	5.72378		F (00)	0.020648	1.89283	0	7.13832	0.0555031	9.1073		F	18.5404
	P (00)	0.0335562	12.0312	5.15966	28.052	1.28992	46.5663		P (00)	0.0814611	29.207	12.5256	0	3.13142	44.9455		P	4.70443
	O (00)	0.00213852	0.294491	0.0324033	2.72234	1.61197	4.66334		O (00)	0.00519148	0.714908	0.0786623	6.60877	0	7.40753		O	16.6738
	All (00)	0.386839	40.0126	10.2133	46.147	3.24038	100		All (00)	0.273346	31.84	20.006	43.9275	3.95314	100
							100								100
LS02	Conversion Matrix (in %)	S (06)	C (06)	F (06)	P (06)	O (06)	All (06)	LS02	Change Matrix (in %)	S (06)	C (06)	F (06)	P (06)	O (06)	All (06)
	S (00)	0.226268	0.00335974	0.000386681	0.000392712	0.000243752	0.23065		S (00)	0	0.00763063	0.00087823	0.000891925	0.000553609	0.00995439		S
	C (00)	0.0113882	38.2132	3.48411	10.0049	1.30352	53.0172		C (00)	0.0258649	0	7.9131	22.7232	2.96054	33.6227		C	23.2452
	F (00)	0.000216668	0.879751	3.13094	2.7172	0.0371796	6.76528		F (00)	0.000492097	1.99809	0	6.1713	0.0844421	8.25432		F	163.942
	P (00)	0.00283468	14.0667	3.42184	14.0925	7.73527	39.3192		P (00)	0.00643811	31.9483	7.77168	0	17.5683	57.2947		P	8.37767
	O (00)	0	0.0277533	0.00647907	0.326063	0.307378	0.667673		O (00)	0	0.0630332	0.0147152	0.740552	0	0.818301		O	161.426
	All (00)	0.240707	53.1908	10.0438	27.1411	9.38359	100		All (00)	0.0327951	34.0171	15.7004	29.6359	20.6139	100
							100								100
LS03								LS03
																	S
																	C
																	F
																	P
																	O
LS04								LS04
																	S
																	C
																	F
																	P
																	O
LS05								LS05
																	S
																	C
																	F
																	P
																	O
LS06	Conversion Matrix (in %)	S (06)	C (06)	F (06)	P (06)	O (06)	All (06)	LS06	Change Matrix (in %)	S (06)	C (06)	F (06)	P (06)	O (06)	All (06)
	S (00)	0.316588	0.00725683	0.00165149	0.00462192	0.000133312	0.330252		S (00)	0	0.0176446	0.0040155	0.0112379	0.00032414	0.0332221		S	3.46457
	C (00)	0.0486889	25.8006	3.89626	12.1663	0.548825	42.4606		C (00)	0.118384	0	9.47355	29.5816	1.33444	40.5079		C	4.85534
	F (00)	0.00357359	1.26982	1.89214	1.8884	0.0125439	5.06647		F (00)	0.00868898	3.0875	0	4.59153	0.0304999	7.71822		F	29.9845
	P (00)	0.0354844	13.1399	3.50178	29.8214	2.30607	48.8046		P (00)	0.0862783	31.9488	8.51439	0	5.60707	46.1566		P	5.59021
	O (00)	0.00494434	0.407524	0.045095	1.83904	1.04149	3.33809		O (00)	0.0120219	0.990871	0.109646	4.47152	0	5.58406		O	18.6821
	All (00)	0.409279	40.625	9.33693	45.7197	3.90906	100		All (00)	0.225373	36.0448	18.1016	38.6559	6.97234	100
							100								100
LS07	Conversion Matrix (in %)	S (06)	C (06)	F (06)	P (06)	O (06)	All (06)	LS07	Change Matrix (in %)	S (06)	C (06)	F (06)	P (06)	O (06)	All (06)
	S (00)	0.167993	0.0046095	0.00187121	0.0106377	8.60733e-05	0.185198		S (00)	0	0.0113624	0.00461251	0.0262218	0.000212169	0.0424089		S	9.28994
	C (00)	0.0318445	18.9426	3.21277	9.96124	0.394611	32.5431		C (00)	0.0784963	0	7.91943	24.5543	0.972709	33.5249		C	8.28612
	F (00)	0.00497524	1.34026	1.76144	2.92485	0.0762303	6.10776		F (00)	0.0122639	3.30371	0	7.20972	0.187907	10.7136		F	19.2564
	P (00)	0.020762	10.2618	3.52176	35.5445	4.79617	54.145		P (00)	0.0511781	25.2951	8.6811	0	11.8225	45.8499		P	4.68119
	O (00)	0.00202797	0.505746	0.0975534	3.39841	3.01526	7.01899		O (00)	0.00499891	1.24666	0.240468	8.37702	0	9.86914		O	17.5
	All (00)	0.227603	31.055	8.5954	51.8396	8.28236	100		All (00)	0.146937	29.8569	16.8456	40.1673	12.9833	100
							100								100
LS08	Conversion Matrix (in %)	S (06)	C (06)	F (06)	P (06)	O (06)	All (06)	LS08	Change Matrix (in %)	S (06)	C (06)	F (06)	P (06)	O (06)	All (06)
	S (00)	0.0981397	0.000978384	9.20015e-06	0.000289896	0.00010456	0.0995217		S (00)	0	0.00335926	3.15886e-05	0.000995352	0.000359004	0.00474521		S	2.26108
	C (00)	0.0140133	14.4027	1.56531	5.94964	0.355806	22.2875		C (00)	0.0481146	0	5.37448	20.428	1.22165	27.0722		C	9.36106
	F (00)	0.000102455	0.361263	0.940099	3.75722	0.0212979	5.07998		F (00)	0.000351776	1.24039	0	12.9003	0.0731259	14.2142		F	18.7379
	P (00)	0.0473746	8.50314	3.01823	53.4778	3.69602	68.7426		P (00)	0.16266	29.1954	10.3631	0	12.6902	52.4113		P	2.15172
	O (00)	0.000282801	0.213984	0.0301737	1.58971	1.95623	3.79038		O (00)	0.000970991	0.734709	0.103601	5.45825	0	6.29753		O	19.9693
	All (00)	0.159913	23.4821	5.55383	64.7747	6.02946	100		All (00)	0.212097	31.1738	15.8412	38.7876	13.9854	100
							100								100
LS09								LS09
																	S
																	C
																	F
																	P
																	O
LS10	Conversion Matrix (in %)	S (06)	C (06)	F (06)	P (06)	O (06)	All (06)	LS10	Change Matrix (in %)	S (06)	C (06)	F (06)	P (06)	O (06)	All (06)
	S (00)	0.166399	0.0122967	0.00254689	0.0071339	1.08859e-05	0.188387		S (00)	0	0.028642	0.00593231	0.0166165	2.53559e-05	0.0512161		S	4.41176
	C (00)	0.0705701	25.4175	5.42915	8.91295	0.102777	39.9329		C (00)	0.164374	0	12.6458	20.7603	0.239392	33.8099		C	8.90855
	F (00)	0.0144164	3.19633	7.55216	5.80674	0.0535281	16.6232		F (00)	0.0335792	7.44499	0	13.5253	0.12468	21.1285		F	17.5055
	P (00)	0.0238403	11.0702	5.98624	23.1685	1.18791	41.4367		P (00)	0.0555296	25.785	13.9434	0	2.76692	42.5508		P	9.97815
	O (00)	0.000613611	0.232874	0.102695	0.719795	0.762896	1.81887		O (00)	0.00142924	0.542418	0.2392	1.67657	0	2.45962		O	18.3849
	All (00)	0.275839	39.9291	19.0728	38.6151	2.10712	100		All (00)	0.254912	33.8011	26.8342	35.9788	3.13101	100
							100								100
LS11	Conversion Matrix (in %)	S (06)	C (06)	F (06)	P (06)	O (06)	All (06)	LS11	Change Matrix (in %)	S (06)	C (06)	F (06)	P (06)	O (06)	All (06)
	S (00)	0.40306	0.00593755	0.000955207	0.00147278	0.000101672	0.411527		S (00)	0	0.0169369	0.00272473	0.0042011	0.00029002	0.0241527		S	1.12824
	C (00)	0.038635	24.8478	3.9494	5.97682	0.271102	35.0837		C (00)	0.110206	0	11.2657	17.0489	0.77332	29.1981		C	5.14814
	F (00)	0.000763037	1.74669	4.26215	4.51879	0.023737	10.5521		F (00)	0.00217656	4.98243	0	12.8899	0.0677097	17.9422		F	19.3323
	P (00)	0.0057613	9.84206	5.50864	34.289	1.19014	50.8355		P (00)	0.0164341	28.0745	15.7134	0	3.39487	47.1992		P	5.80913
	O (00)	0.000123471	0.271986	0.0975368	1.6063	1.14112	3.11707		O (00)	0.000352201	0.77584	0.278224	4.58198	0	5.6364		O	17.2208
	All (00)	0.448343	36.7144	13.8187	46.3923	2.6262	100		All (00)	0.129169	33.8497	27.26	34.5249	4.23619	100
							100								100
LS12								LS12
																	S
																	C
																	F
																	P
																	O
LS13	Conversion Matrix (in %)	S (06)	C (06)	F (06)	P (06)	O (06)	All (06)	LS13	Change Matrix (in %)	S (06)	C (06)	F (06)	P (06)	O (06)	All (06)
	S (00)	0.0362765	0.0019564	0.000430214	0.00042921	0	0.0390923		S (00)	0	0.00753801	0.00165762	0.00165375	0	0.0108494		S
	C (00)	0.00747611	4.35618	1.84923	2.15025	0.0278848	8.39102		C (00)	0.0288055	0	7.12511	8.2849	0.10744	15.5463		C	13.9499
	F (00)	0.00519837	7.47442	60.4909	2.52906	0.272588	70.7722		F (00)	0.0200294	28.799	0	9.74449	1.05028	39.6138		F	2.04181
	P (00)	0.0109753	5.09841	6.33603	9.16217	0.0244244	20.632		P (00)	0.0422878	19.6442	24.4127	0	0.0941072	44.1933		P	12.3306
	O (00)	0	0.00921249	0.0997911	0.0560081	0.000684863	0.165697		O (00)	0	0.0354958	0.384496	0.2158	0	0.635791		O
	All (00)	0.0599262	16.9402	68.7764	13.8979	0.325582	100		All (00)	0.0911226	48.4862	31.924	18.2468	1.25183	100
							100								100
LS14	Conversion Matrix (in %)	S (06)	C (06)	F (06)	P (06)	O (06)	All (06)	LS14	Change Matrix (in %)	S (06)	C (06)	F (06)	P (06)	O (06)	All (06)
	S (00)	0.228499	0.000709017	0.000230144	0.000302019	8.83119e-05	0.229829		S (00)	0	0.00163879	0.000531946	0.000698076	0.000204121	0.00307294		S	1.55644
	C (00)	0.016028	10.715	4.54271	4.74066	0.0657431	20.0802		C (00)	0.0370465	0	10.4998	10.9574	0.151956	21.6462		C	12.3575
	F (00)	0.00839854	6.53594	28.9545	5.49272	0.07941	41.071		F (00)	0.0194121	15.1069	0	12.6957	0.183545	28.0056		F	6.83947
	P (00)	0.0115098	8.09054	13.0268	16.834	0.290061	38.2529		P (00)	0.0266034	18.7002	30.1098	0	0.670436	49.507		P	8.24103
	O (00)	0.000108586	0.0919299	0.106708	0.163881	0.00347035	0.366097		O (00)	0.000250981	0.212483	0.24664	0.378788	0	0.838162		O	17.0276
	All (00)	0.264544	25.4341	46.631	27.2315	0.438772	100		All (00)	0.0833129	34.0212	40.8568	24.0326	1.00614	100
							100								100
LS15	Conversion Matrix (in %)	S (06)	C (06)	F (06)	P (06)	O (06)	All (06)	LS15	Change Matrix (in %)	S (06)	C (06)	F (06)	P (06)	O (06)	All (06)
	S (00)	0.0632173	0.00403735	0.000823852	0.00130107	2.52925e-05	0.0694048		S (00)	0	0.0107301	0.00218955	0.00345787	6.722e-05	0.0164447		S	2.57458
	C (00)	0.0269871	12.969	3.77054	5.75885	0.0741348	22.5995		C (00)	0.0717236	0	10.021	15.3053	0.197028	25.595		C	10.7172
	F (00)	0.00569784	3.13546	8.36717	5.15184	0.121781	16.782		F (00)	0.0151432	8.33312	0	13.6921	0.323656	22.364		F	12.6296
	P (00)	0.00964997	9.16652	8.29754	40.9112	1.14066	59.5255		P (00)	0.0256467	24.3619	22.0524	0	3.03154	49.4715		P	4.00272
	O (00)	0.000101019	0.162632	0.126354	0.671545	0.062922	1.02355		O (00)	0.000268478	0.432228	0.335811	1.78477	0	2.55307		O	18.4073
	All (00)	0.105653	25.4377	20.5624	52.4947	1.39952	100		All (00)	0.112782	33.138	32.4114	30.7856	3.55229	100
							100								100
LS16	Conversion Matrix (in %)	S (06)	C (06)	F (06)	P (06)	O (06)	All (06)	LS16	Change Matrix (in %)	S (06)	C (06)	F (06)	P (06)	O (06)	All (06)
	S (00)	0.0109613	0.000838303	2.46402e-05	0.0059908	0.000124149	0.0179392		S (00)	0	0.00354819	0.000104292	0.0253565	0.000525471	0.0295345		S	2.97697
	C (00)	0.00177237	1.54489	0.112574	1.96716	0.243489	3.86989		C (00)	0.00750168	0	0.47648	8.32617	1.03059	9.84074		C	18.9236
	F (00)	0.00251411	0.0514474	0.682317	1.64891	0.117599	2.50279		F (00)	0.0106412	0.217755	0	6.97914	0.497749	7.70529		F	17.8417
	P (00)	0.00555313	1.22536	2.30754	65.8347	7.20793	76.5811		P (00)	0.0235041	5.18643	9.76687	0	30.5081	45.4849		P	2.50711
	O (00)	0.0102917	0.130807	0.271214	8.3151	8.30085	17.0283		O (00)	0.0435604	0.553652	1.14794	35.1943	0	36.9395		O	14.9479
	All (00)	0.0310926	2.95334	3.37367	77.7719	15.87	100		All (00)	0.0852073	5.96138	11.3914	50.525	32.037	100
							100								100
LS17	Conversion Matrix (in %)	S (06)	C (06)	F (06)	P (06)	O (06)	All (06)	LS17	Change Matrix (in %)	S (06)	C (06)	F (06)	P (06)	O (06)	All (06)
	S (00)	0	0	0	0	0	0		S (00)	0	0	0	0	0	0		S
	C (00)	0	0.0750778	0.0290218	0.141052	0.00380812	0.248959		C (00)	0	0	0.228803	1.11203	0.0300227	1.37086		C	7.29323
	F (00)	0	0.00796416	0.939891	2.4386	0.0283476	3.4148		F (00)	0	0.0627883	0	19.2255	0.223489	19.5118		F	20
	P (00)	1.00203e-05	0.0541928	5.71832	86.2871	4.20349	96.2631		P (00)	7.89984e-05	0.427248	45.0824	0	33.1397	78.6495		P	1.1099
	O (00)	0	0.00146035	0.00846653	0.049414	0.0138123	0.0731532		O (00)	0	0.0115132	0.0667489	0.389573	0	0.467835		O	234.789
	All (00)	1.00203e-05	0.138695	6.6957	88.9161	4.24946	100		All (00)	7.89984e-05	0.501549	45.378	20.7271	33.3932	100
							100								100
LS18	Conversion Matrix (in %)	S (06)	C (06)	F (06)	P (06)	O (06)	All (06)	LS18	Change Matrix (in %)	S (06)	C (06)	F (06)	P (06)	O (06)	All (06)
	S (00)	0.150707	0.00541421	0.00317137	0.0260282	0.000550045	0.185871		S (00)	0	0.0349341	0.0204626	0.167941	0.00354905	0.226887		S	8.83077
	C (00)	0.0431363	0.704182	0.0233517	0.587672	0.0378182	1.39616		C (00)	0.278328	0	0.150672	3.79183	0.244014	4.46484		C	11.3782
	F (00)	0.0033863	0.0101746	2.11838	4.3591	0.043247	6.5343		F (00)	0.0218494	0.0656494	0	28.1262	0.279042	28.4927		F	18.4122
	P (00)	0.089384	0.953584	6.88416	81.5084	2.28477	91.7203		P (00)	0.576732	6.1528	44.4186	0	14.742	65.8901		P	1.14844
	O (00)	0.000214229	0.000466109	0.00575547	0.136991	0.0199834	0.16341		O (00)	0.00138227	0.00300747	0.037136	0.883906	0	0.925432		O	204.963
	All (00)	0.286828	1.67382	9.03482	86.6182	2.38637	100		All (00)	0.878291	6.25639	44.6268	32.9699	15.2686	100
							100								100
LS19	Conversion Matrix (in %)	S (06)	C (06)	F (06)	P (06)	O (06)	All (06)	LS19	Change Matrix (in %)	S (06)	C (06)	F (06)	P (06)	O (06)	All (06)
	S (00)	1.51109	0	0	0.0458975	0	1.55698		S (00)	0	0	0	0.230592	0	0.230592		S
	C (00)	0.129454	1.54286	0.0176529	5.4159	0	7.10587		C (00)	0.650387	0	0.0886892	27.2098	0	27.9489		C
	F (00)	0	0.0317752	1.16627	2.06892	0	3.26696		F (00)	0	0.159641	0	10.3944	0	10.554		F
	P (00)	0.946194	4.1955	7.05291	75.8756	0	88.0702		P (00)	4.75374	21.0785	35.4343	0	0	61.2665		P
	O (00)	0	0	0	0	0	0		O (00)	0	0	0	0	0	0		O
	All (00)	2.58673	5.77014	8.23683	83.4063	0	100		All (00)	5.40413	21.2381	35.523	37.8348	0	100
							100								100
LS20	Conversion Matrix (in %)	S (06)	C (06)	F (06)	P (06)	O (06)	All (06)	LS20	Change Matrix (in %)	S (06)	C (06)	F (06)	P (06)	O (06)	All (06)
	S (00)	0	0	0	0	0	0		S (00)	0	0	0	0	0	0		S
	C (00)	0	0	0	1.80201e-05	0.000117131	0.000135151		C (00)	0	0	0	0.000118577	0.00077075	0.000889327		C
	F (00)	4.30245e-05	0	0	0.265734	0.00840966	0.274187		F (00)	0.000283113	0	0	1.7486	0.0553378	1.80422		F
	P (00)	0.126752	0	0.0675028	83.0197	5.31778	88.5318		P (00)	0.834065	0	0.444186	0	34.9924	36.2707		P	1.93504
	O (00)	0.00366959	0	0.00982243	9.3971	1.78332	11.1939		O (00)	0.0241469	0	0.0646343	61.8354	0	61.9242		O	132.162
	All (00)	0.130465	0	0.0773252	92.6826	7.10963	100		All (00)	0.858495	0	0.508821	63.5842	35.0485	100
							100								100
LS21	Conversion Matrix (in %)	S (06)	C (06)	F (06)	P (06)	O (06)	All (06)	LS21	Change Matrix (in %)	S (06)	C (06)	F (06)	P (06)	O (06)	All (06)
	S (00)	0.00122665	0	0	0.0739285	0.00323954	0.0783947		S (00)	0	0	0	0.495771	0.0217247	0.517496		S
	C (00)	0	0	0	0	1.4627e-05	1.4627e-05		C (00)	0	0	0	0	9.80902e-05	9.80902e-05		C
	F (00)	0	0	0.000198605	0.285072	0.00711748	0.292388		F (00)	0	0	0	1.91172	0.0477304	1.95945		F
	P (00)	0.00286141	0.000526574	0.662337	82.0569	4.13797	86.8605		P (00)	0.0191889	0.00353125	4.44169	0	27.7496	32.214		P	1.73932
	O (00)	0.00701459	0	0.00747445	9.72427	3.02989	12.7687		O (00)	0.0470404	0	0.0501243	65.2118	0	65.309		O	59.9063
	All (00)	0.0111026	0.000526574	0.67001	92.1401	7.17823	100		All (00)	0.0662293	0.00353125	4.49182	67.6193	27.8191	100
							100								100
LS22	Conversion Matrix (in %)	S (06)	C (06)	F (06)	P (06)	O (06)	All (06)	LS22	Change Matrix (in %)	S (06)	C (06)	F (06)	P (06)	O (06)	All (06)
	S (00)	6.91831	0.0570823	0.17079	0.857118	0.0473035	8.0506		S (00)	0	0.192196	0.575051	2.88592	0.159271	3.81243		S	1.22199
	C (00)	0.301547	0.664918	0.0802023	2.78734	0.509671	4.34367		C (00)	1.01531	0	0.270041	9.38496	1.71606	12.3864		C	67.7853
	F (00)	0.121259	0.0802684	5.67796	9.31887	0.0700048	15.2684		F (00)	0.408281	0.270264	0	31.3766	0.235706	32.2909		F	19.8668
	P (00)	2.33425	1.16284	10.2645	57.0388	1.53701	72.3374		P (00)	7.85941	3.91529	34.5605	0	5.1751	51.5103		P	1.61384
	O (00)	0	0	0	0	0	0		O (00)	0	0	0	0	0	0		O
	All (00)	9.67536	1.96511	16.1934	70.0021	2.16399	100		All (00)	9.283	4.37775	35.4056	43.6475	7.28614	100
							100								100
LS23	Conversion Matrix (in %)	S (06)	C (06)	F (06)	P (06)	O (06)	All (06)	LS23	Change Matrix (in %)	S (06)	C (06)	F (06)	P (06)	O (06)	All (06)
	S (00)	15.4995	0.125667	0.465494	1.51294	0	17.6036		S (00)	0	0.348857	1.29223	4.19998	0	5.84107		S
	C (00)	0.10999	0.023028	0.117259	0.826682	0	1.07696		C (00)	0.305336	0	0.325515	2.2949	0	2.92575		C
	F (00)	0.323708	0.0305943	5.5263	4.23101	0	10.1116		F (00)	0.898626	0.0849311	0	11.7455	0	12.729		F
	P (00)	3.71792	0.281584	24.2797	42.9287	0	71.2079		P (00)	10.3211	0.78169	67.4014	0	0	78.5042		P
	O (00)	0	0	0	0	0	0		O (00)	0	0	0	0	0	0		O
	All (00)	19.6511	0.460874	30.3887	49.4993	0	100		All (00)	11.5251	1.21548	69.0191	18.2403	0	100
							100								100

## Sheet: RCMRD_Lesotho_00_14
24 Land Systems classification		WGT_AVG (temporarely normalized)	WGT_AVG	WGT_AVG	WGT_AVG	WGT_AVG
No PP LS Code	Land system name	settlement	cropland	forest	pasture	other land			Total area LS Urb.	Total area LS Crop	Total area LS Forest	Total area LS Grassland	Total area LS Other
0	Cropland; extensive with few livestock	100.343	397.094	3429.78	225.171	748.427			3.36289e+08	3.36289e+08	3.36289e+08	3.36289e+08	3.36289e+08
1	Cropland; extensive with bovines, goats & sheep	102.874	539.866	171.451	268.202	1306.44			1.41386e+08	1.41386e+08	1.41386e+08	1.41386e+08	1.41386e+08
2	Cropland; medium intensive with few livestock
3	Cropland; medium intensive with bovines, goats & sheep
4	Cropland; intensive with few livestock
5	Cropland; intensive with bovines, goats & sheep
6	Mosaic cropland and grassland with bovines, goats & sheep	105.455	143.997	100	140.151	159.849			2.56917e+08	2.56917e+08	2.56917e+08	2.56917e+08	2.56917e+08
7	Mosaic cropland (extensive) and grassland with few livestock	110.904	554.486	653.409	698.533	405.482			2.77149e+09	2.77149e+09	2.77149e+09	2.77149e+09	2.77149e+09
8	Mosaic cropland (medium intensive) and grassland with few livestock	930.131	893.282	560.799	179.715	218.087			4.79512e+08	4.79512e+08	4.79512e+08	4.79512e+08	4.79512e+08
9	Mosaic cropland (intensive) and grassland with few livestock
10	Mosaic cropland (extensive) and forest with few livestock	268.628	299.069	650.089	212.178	492.775			9.4257e+08	9.4257e+08	9.4257e+08	9.4257e+08	9.4257e+08
11	Mosaic cropland (medium intensive) and forest with few livestock
12	Mosaic cropland (intensive) and forest with few livestock
13	Dense forest
14	Open forest with few livestock		106.49	108.475	115.362	100				1.23157e+07	1.23157e+07	1.23157e+07	1.23157e+07
15	Mosaic grassland and forest	191.112	519.933	142.058	462.201	170.054			6.3206e+09	6.3206e+09	6.3206e+09	6.3206e+09	6.3206e+09
16	Mosaic grassland and bare	200.91	789.892	140.415	893.118	640.42			6.17791e+09	6.17791e+09	6.17791e+09	6.17791e+09	6.17791e+09
17	Natural grassland
18	Grassland with few livestock	149.773	441.069	186.891	333.668	471.211			1.12754e+10	1.12754e+10	1.12754e+10	1.12754e+10	1.12754e+10
19	Grassland with bovines, goats and sheep	151.414	589.572	101.769	775.953	337.985			1.53484e+09	1.53484e+09	1.53484e+09	1.53484e+09	1.53484e+09
20	Bare
21	Bare with few livestock
22	Peri-urban & villages	101.809	333.663	185.066	223.912	1642.93			3.09525e+08	3.09525e+08	3.09525e+08	3.09525e+08	3.09525e+08
23	Urban
								SUM	3.05465e+10	3.05588e+10	3.05588e+10	3.05588e+10	3.05588e+10
																		Net change fraction of total change per class
LS00	Conversion Matrix (in %)	S (06)	C (06)	F (06)	P (06)	O (06)	All (06)	LS00	Change Matrix (in %)	S (06)	C (06)	F (06)	P (06)	O (06)	All (06)			MED (normalized)
	S (00)	2.59354	0.00329662	0.000599386	0.000899078	0	2.59834		S (00)	0	0.00982529	0.00178642	0.00267962	0	0.0142913		S
	C (00)	1.9543	42.8791	0.749232	4.1969	4.20559	53.9852		C (00)	5.82461	0	2.23302	12.5085	12.5344	33.1005		C
	F (00)	0.0740241	0.642841	0.492395	0.982992	0.0764217	2.26867		F (00)	0.220622	1.91593	0	2.92972	0.227768	5.29404		F
	P (00)	0.423766	12.6842	1.00127	19.3673	0.412977	33.8896		P (00)	1.263	37.8041	2.98421	0	1.23084	43.2822		P
	O (00)	0.349742	5.25212	0.131865	0.40938	1.11516	7.25826		O (00)	1.04237	15.6535	0.393012	1.22012	0	18.309		O
	All (00)	5.39537	61.4616	2.37537	24.9575	5.81014	100		All (00)	8.3506	55.3834	5.61203	16.661	13.993	100
							100								100
LS01	Conversion Matrix (in %)	S (06)	C (06)	F (06)	P (06)	O (06)	All (06)	LS01	Change Matrix (in %)	S (06)	C (06)	F (06)	P (06)	O (06)	All (06)
	S (00)	3.35642	0.00932903	0.00215285	0.00466451	0	3.37256		S (00)	0	0.022476	0.00518677	0.011238	0	0.0389008		S
	C (00)	3.64555	44.2893	0.352665	3.9988	7.77179	60.0581		C (00)	8.78307	0	0.84966	9.63414	18.7242	37.9911		C
	F (00)	0.00215285	0.104772	0.0330104	0.655544	0.00466451	0.800144		F (00)	0.00518677	0.252423	0	1.57937	0.011238	1.84822		F
	P (00)	0.0990312	12.5457	0.377064	9.51217	0.39598	22.9299		P (00)	0.238591	30.2257	0.908443	0	0.954017	32.3268		P
	O (00)	0.886799	10.1894	0.068073	0.392493	1.3025	12.8393		O (00)	2.13653	24.5489	0.164005	0.945615	0	27.795		O
	All (00)	7.98995	67.1385	0.832965	14.5637	9.47493	100		All (00)	11.1634	55.0495	1.9273	12.1704	19.6895	100
							100								100
LS02								LS02
																	S
																	C
																	F
																	P
																	O
LS03								LS03
																	S
																	C
																	F
																	P
																	O
LS04								LS04
																	S
																	C
																	F
																	P
																	O
LS05								LS05
																	S
																	C
																	F
																	P
																	O
LS06	Conversion Matrix (in %)	S (06)	C (06)	F (06)	P (06)	O (06)	All (06)	LS06	Change Matrix (in %)	S (06)	C (06)	F (06)	P (06)	O (06)	All (06)
	S (00)	0.0488894	0	0.000472361	0.00023618	0	0.0495979		S (00)	0	0	0.00225051	0.00112526	0	0.00337577		S
	C (00)	0.00188944	27.0765	0.0136985	1.98992	0.396806	29.4788		C (00)	0.00900204	0	0.0652648	9.48076	1.89054	11.4456		C
	F (00)	0	0	0	0.0150122	0	0.0150122		F (00)	0	0	0	0.0715239	0	0.0715239		F
	P (00)	0.024799	16.6027	0.18115	51.7812	0.653749	69.2435		P (00)	0.118152	79.1015	0.863071	0	3.11471	83.1975		P
	O (00)	0	0.81591	0	0.292747	0.104352	1.21301		O (00)	0	3.88731	0	1.39476	0	5.28207		O
	All (00)	0.0755778	44.4951	0.195321	54.0791	1.15491	100		All (00)	0.127154	82.9888	0.930586	10.9482	5.00525	100
							100								100
LS07	Conversion Matrix (in %)	S (06)	C (06)	F (06)	P (06)	O (06)	All (06)	LS07	Change Matrix (in %)	S (06)	C (06)	F (06)	P (06)	O (06)	All (06)
	S (00)	1.36093	0.0129779	0.000614574	0.00205141	0.000139721	1.37672		S (00)	0	0.0551824	0.00261319	0.00872265	0.000594099	0.0671124		S	3.74239
	C (00)	0.455492	20.942	0.373049	6.38496	1.84145	29.9969		C (00)	1.93677	0	1.58621	27.1491	7.82989	38.5019		C	1.16787
	F (00)	0.00360371	0.0977545	0.101938	0.137717	0.0113324	0.352347		F (00)	0.0153231	0.415655	0	0.585579	0.0481859	1.06474		F	14.021
	P (00)	0.0795818	9.94825	1.21449	53.6575	0.777948	65.6778		P (00)	0.338384	42.3003	5.16407	0	3.30786	51.1106		P	0.694076
	O (00)	0.0420265	1.77522	0.0373696	0.322131	0.419482	2.59623		O (00)	0.178698	7.54829	0.158897	1.36971	0	9.2556		O	3.65543
	All (00)	1.94164	32.7762	1.72747	60.5044	3.05035	100		All (00)	2.46917	50.3194	6.91179	29.1131	11.1865	100
							100								100
LS08	Conversion Matrix (in %)	S (06)	C (06)	F (06)	P (06)	O (06)	All (06)	LS08	Change Matrix (in %)	S (06)	C (06)	F (06)	P (06)	O (06)	All (06)
	S (00)	1.85903	0.0303748	0.00152731	0.000932131	0.00144656	1.89331		S (00)	0	0.11565	0.00581511	0.00354901	0.00550764	0.130521		S	1.95489
	C (00)	0.0985267	29.5674	0.516354	2.62848	2.432	35.2427		C (00)	0.375132	0	1.96597	10.0077	9.25963	21.6084		C	6.03412
	F (00)	0	0.26211	0.0628216	0.442365	0.000763656	0.76806		F (00)	0	0.997963	0	1.68427	0.00290756	2.68514		F
	P (00)	0.00309906	14.6131	1.04661	41.5668	0.377965	57.6076		P (00)	0.0117994	55.6382	3.98489	0	1.43907	61.074		P	2.12914
	O (00)	0.00758178	3.61788	0.0250477	0.158352	0.679408	4.48827		O (00)	0.028867	13.7748	0.0953672	0.602912	0	14.5019		O	5.46592
	All (00)	1.96824	48.0909	1.65236	44.797	3.49158	100		All (00)	0.415799	70.5266	6.05204	12.2984	10.7071	100
							100								100
LS09								LS09
																	S
																	C
																	F
																	P
																	O
LS10	Conversion Matrix (in %)	S (06)	C (06)	F (06)	P (06)	O (06)	All (06)	LS10	Change Matrix (in %)	S (06)	C (06)	F (06)	P (06)	O (06)	All (06)
	S (00)	0.160034	0.000658897	0.000147164	0.000844371	0.000108778	0.161793		S (00)	0	0.00227541	0.000508211	0.00291592	0.00037565	0.00607519		S
	C (00)	0.0443743	11.4325	0.402209	3.44138	0.90177	16.2222		C (00)	0.15324	0	1.38897	11.8843	3.11414	16.5407		C	3.48706
	F (00)	0	1.36425	2.41187	1.42776	0	5.20389		F (00)	0	4.71125	0	4.93059	0	9.64184		F	3.95089
	P (00)	0.035537	17.7722	2.15253	56.9232	0.486293	77.3698		P (00)	0.122722	61.3739	7.43346	0	1.67935	70.6094		P	1.30012
	O (00)	0.00102806	0.411605	0.0317821	0.482792	0.115106	1.04231		O (00)	0.00355026	1.42142	0.109755	1.66726	0	3.20198		O	3.59135
	All (00)	0.240973	30.9812	4.99854	62.276	1.50328	100		All (00)	0.279513	67.5088	8.9327	18.4851	4.79386	100
							100								100
LS11								LS11
																	S
																	C
																	F
																	P
																	O
LS12								LS12
																	S
																	C
																	F
																	P
																	O
LS13								LS13
																	S
																	C
																	F
																	P
																	O
LS14	Conversion Matrix (in %)	S (06)	C (06)	F (06)	P (06)	O (06)	All (06)	LS14	Change Matrix (in %)	S (06)	C (06)	F (06)	P (06)	O (06)	All (06)
	S (00)	0	0	0	0	0	0		S (00)	0	0	0	0	0	0		S
	C (00)	0	0.12275	0	0.441899	0	0.564648		C (00)	0	0	0	2.28426	0	2.28426		C
	F (00)	0	0	0.360065	0.163666	0	0.523732		F (00)	0	0	0	0.846024	0	0.846024		F
	P (00)	0	13.6416	4.02619	80.1718	0	97.8396		P (00)	0	70.5161	20.8122	0	0	91.3283		P
	O (00)	0	0.417349	0	0.654664	0	1.07201		O (00)	0	2.15736	0	3.38409	0	5.54146		O
	All (00)	0	14.1817	4.38625	81.4321	0	100		All (00)	0	72.6734	20.8122	6.51438	0	100
							100								100
LS15	Conversion Matrix (in %)	S (06)	C (06)	F (06)	P (06)	O (06)	All (06)	LS15	Change Matrix (in %)	S (06)	C (06)	F (06)	P (06)	O (06)	All (06)
	S (00)	0.0572718	0.000139415	0.000101935	0.000659702	0	0.0581729		S (00)	0	0.000913693	0.000668056	0.00432354	0	0.00590529		S	3.15735
	C (00)	0.0103597	2.06566	0.159562	2.8647	0.12654	5.22682		C (00)	0.067895	0	1.04573	18.7746	0.829317	20.7175		C	4.76535
	F (00)	0.00107016	0.0402417	0.102694	0.777098	0.000301783	0.921406		F (00)	0.00701358	0.263735	0	5.09292	0.00197782	5.36565		F	140.115
	P (00)	0.0178622	7.04481	1.10752	82.4559	0.244807	90.8709		P (00)	0.117065	46.1701	7.25845	0	1.60441	55.15		P	0.191779
	O (00)	0.000159806	0.335032	0.0231132	2.50431	0.0601148	2.92273		O (00)	0.00104733	2.19573	0.151478	16.4127	0	18.7609		O	5.56757
	All (00)	0.0867237	9.48589	1.39299	88.6026	0.431764	100		All (00)	0.193021	48.6305	8.45633	40.2845	2.4357	100
							100								100
LS16	Conversion Matrix (in %)	S (06)	C (06)	F (06)	P (06)	O (06)	All (06)	LS16	Change Matrix (in %)	S (06)	C (06)	F (06)	P (06)	O (06)	All (06)
	S (00)	1.40938	0.0231229	0.00191703	0.00105853	0.000987426	1.43647		S (00)	0	0.0787065	0.00652525	0.00360306	0.00336104	0.0921959		S	2.61828
	C (00)	0.256514	38.3676	0.395275	4.83269	4.50998	48.3621		C (00)	0.873132	0	1.34545	16.4497	15.3512	34.0195		C	0.666623
	F (00)	0.00212384	0.173746	0.136102	0.118159	0.00597113	0.436102		F (00)	0.00722921	0.591404	0	0.402192	0.0203247	1.02115		F	39.7491
	P (00)	0.0281569	10.7798	1.53142	30.099	0.977325	43.4156		P (00)	0.0958414	36.6925	5.21269	0	3.32665	45.3277		P	2.08172
	O (00)	0.0358704	4.58246	0.172232	0.949861	0.609277	6.3497		O (00)	0.122097	15.5979	0.586248	3.23317	0	19.5395		O	3.37458
	All (00)	1.73205	53.9267	2.23694	36.0008	6.10354	100		All (00)	1.0983	52.9606	7.15092	20.0887	18.7016	100
							100								100
LS17								LS17
																	S
																	C
																	F
																	P
																	O
LS18	Conversion Matrix (in %)	S (06)	C (06)	F (06)	P (06)	O (06)	All (06)	LS18	Change Matrix (in %)	S (06)	C (06)	F (06)	P (06)	O (06)	All (06)
	S (00)	2.5849	0.00819028	0.000240639	0.00129368	0.000135453	2.59476		S (00)	0	0.0434765	0.00127739	0.00686724	0.000719025	0.0523402		S	2.93878
	C (00)	1.00901	13.1652	0.202035	3.3537	1.55677	19.2867		C (00)	5.35611	0	1.07246	17.8025	8.26379	32.4948		C	2.38189
	F (00)	0.0456839	0.0533096	0.0510404	0.355803	0.00327673	0.509113		F (00)	0.242504	0.282984	0	1.88871	0.0173939	2.43159		F	47.1995
	P (00)	0.270928	7.47325	0.937783	65.1525	0.419493	74.254		P (00)	1.43817	39.6703	4.97804	0	2.2268	48.3133		P	0.472423
	O (00)	0.139118	1.44047	0.0737958	1.49413	0.207922	3.35543		O (00)	0.738478	7.64646	0.391731	7.93129	0	16.708		O	4.81771
	All (00)	4.04964	22.1404	1.26489	70.3575	2.18759	100		All (00)	7.77526	47.6432	6.44351	27.6293	10.5087	100
							100								100
LS19	Conversion Matrix (in %)	S (06)	C (06)	F (06)	P (06)	O (06)	All (06)	LS19	Change Matrix (in %)	S (06)	C (06)	F (06)	P (06)	O (06)	All (06)
	S (00)	0.225958	0.00659016	0.000235181	0.000734305	0	0.233518		S (00)	0	0.0271906	0.000970342	0.0030297	0	0.0311906		S	2.23665
	C (00)	0.213192	15.1072	0.101192	3.6309	1.95357	21.0061		C (00)	0.879619	0	0.417513	14.9809	8.0603	24.3383		C	2.68166
	F (00)	0.000184774	0.0401427	0	0.172051	0.00102713	0.213406		F (00)	0.000762365	0.165626	0	0.709872	0.00423788	0.880499		F
	P (00)	0.0354428	8.25378	0.495367	59.5687	0.322734	68.6761		P (00)	0.146235	34.0546	2.04385	0	1.33158	37.5763		P	0.629418
	O (00)	0.0367587	2.73696	0.0145422	6.2215	0.861174	9.87094		O (00)	0.151664	11.2925	0.0600004	25.6696	0	37.1737		O	4.843
	All (00)	0.511537	26.1447	0.611336	69.5939	3.1385	100		All (00)	1.17828	45.5399	2.52234	41.3633	9.39612	100
							100								100
LS20								LS20
																	S
																	C
																	F
																	P
																	O
LS21								LS21
																	S
																	C
																	F
																	P
																	O
LS22	Conversion Matrix (in %)	S (06)	C (06)	F (06)	P (06)	O (06)	All (06)	LS22	Change Matrix (in %)	S (06)	C (06)	F (06)	P (06)	O (06)	All (06)
	S (00)	28.1096	0.0765025	0.00231226	0.00245342	0.000742774	28.1916		S (00)	0	0.275655	0.00833157	0.00884018	0.00267637	0.295503		S
	C (00)	10.2484	42.157	0.627229	2.35923	3.30392	58.6958		C (00)	36.9272	0	2.26004	8.5008	11.9047	59.5928		C
	F (00)	0.367719	0.216045	0.197094	0.107634	0.0108452	0.899337		F (00)	1.32497	0.778456	0	0.387827	0.0390777	2.53033		F
	P (00)	1.64539	4.13892	1.06554	1.58753	0.283646	8.72102		P (00)	5.92868	14.9134	3.83935	0	1.02204	25.7035		P
	O (00)	0.702405	2.25281	0.146955	0.194296	0.195735	3.4922		O (00)	2.53091	8.11736	0.52951	0.700089	0	11.8779		O
	All (00)	41.0735	48.8413	2.03913	4.25115	3.79489	100		All (00)	46.7118	24.0849	6.63723	9.59756	12.9685	100
							100								100
LS23								LS23
																	S
																	C
																	F
																	P
																	O

## Sheet: RCMRD_Malawi_00_10
24 Land Systems classification		WGT_AVG (temporarely normalized)	WGT_AVG	WGT_AVG	WGT_AVG	WGT_AVG
No PP LS Code	Land system name	settlement	cropland	forest	pasture	other land			Total area LS Urb	Total area LS Crop	Total area LS Forest	Total area LS Grassland	Total area LS Other
0	Cropland; extensive with few livestock	100	299.391	271.065	200.129	233.471			1.83468e+09	1.83468e+09	1.83468e+09	1.83468e+09	1.83468e+09
1	Cropland; extensive with bovines, goats & sheep
2	Cropland; medium intensive with few livestock
3	Cropland; medium intensive with bovines, goats & sheep
4	Cropland; intensive with few livestock
5	Cropland; intensive with bovines, goats & sheep
6	Mosaic cropland and grassland with bovines, goats & sheep
7	Mosaic cropland (extensive) and grassland with few livestock	128.681	203.186	591.954	307.062	244.498			7.73793e+09	7.73793e+09	7.73793e+09	7.73793e+09	7.73793e+09
8	Mosaic cropland (medium intensive) and grassland with few livestock
9	Mosaic cropland (intensive) and grassland with few livestock
10	Mosaic cropland (extensive) and forest with few livestock	113.249	360.715	697.516	488.096	177.144			1.34963e+10	1.34963e+10	1.34963e+10	1.34963e+10	1.34963e+10
11	Mosaic cropland (medium intensive) and forest with few livestock
12	Mosaic cropland (intensive) and forest with few livestock
13	Dense forest		101.946	120.882	147.875	154.194				8.57806e+07	8.57806e+07	8.57806e+07	8.57806e+07
14	Open forest with few livestock	100	240.536	395.57	375.582	769.314			3.19662e+09	3.19662e+09	3.19662e+09	3.19662e+09	3.19662e+09
15	Mosaic grassland and forest	117.008	778.048	471.53	286.498	166.416			3.94511e+10	3.94511e+10	3.94511e+10	3.94511e+10	3.94511e+10
16	Mosaic grassland and bare		100.272	400.581	233.66	307.352				4.39097e+08	4.39097e+08	4.39097e+08	4.39097e+08
17	Natural grassland	100.693	135.469	265.1	135.643	209.615			4.29994e+08	4.29994e+08	4.29994e+08	4.29994e+08	4.29994e+08
18	Grassland with few livestock	144.49	356.874	454.919	420.848	170.123			2.66782e+10	2.66782e+10	2.66782e+10	2.66782e+10	2.66782e+10
19	Grassland with bovines, goats and sheep	100	108.842	147.381	317.567	244.482			2.53314e+09	2.53314e+09	2.53314e+09	2.53314e+09	2.53314e+09
20	Bare		115.625	106.25	148.398	154.941				2.56637e+08	2.56637e+08	2.56637e+08	2.56637e+08
21	Bare with few livestock
22	Peri-urban & villages	401.149	183.152	1038.59	187.112	106.793			1.69567e+08	1.69567e+08	1.69567e+08	1.69567e+08	1.69567e+08
23	Urban	138.309	285.271	518.894	128.844	100			8.54817e+07	8.54817e+07	8.54817e+07	8.54817e+07	8.54817e+07
								SUM	9.5613e+10	9.63945e+10	9.63945e+10	9.63945e+10	9.63945e+10
																		Net change fraction of total change per class
LS00	Conversion Matrix (in %)	S (06)	C (06)	F (06)	P (06)	O (06)	All (06)	LS00	Change Matrix (in %)	S (06)	C (06)	F (06)	P (06)	O (06)	All (06)			MED
	S (00)	0.000151246	0	0	0	0	0.000151246		S (00)	0	0	0	0	0	0		S
	C (00)	0.0998933	28.8567	0.982849	1.34987	0.0840213	31.3733		C (00)	0.422897	0	4.16088	5.71467	0.355703	10.6542		C	2.70528
	F (00)	0.00311846	3.07093	41.4673	9.9695	0.0795088	54.5904		F (00)	0.013202	13.0007	0	42.2058	0.3366	55.5563		F	1.63864
	P (00)	0.0290612	5.03416	2.74186	5.0395	0.0614168	12.906		P (00)	0.12303	21.312	11.6076	0	0.260007	33.3027		P	8.11808
	O (00)	0	0.0450345	0.0661353	0.00381604	1.01517	1.13016		O (00)	0	0.190653	0.279983	0.0161552	0	0.486792		O	4.86181
	All (00)	0.132224	37.0068	45.2582	16.3627	1.24012	100		All (00)	0.559129	34.5034	16.0485	47.9366	0.95231	100
							100								100
LS01								LS01
																	S
																	C
																	F
																	P
																	O
LS02								LS02
																	S
																	C
																	F
																	P
																	O
LS03								LS03
																	S
																	C
																	F
																	P
																	O
LS04								LS04
																	S
																	C
																	F
																	P
																	O
LS05								LS05
																	S
																	C
																	F
																	P
																	O
LS06								LS06
																	S
																	C
																	F
																	P
																	O
LS07	Conversion Matrix (in %)	S (06)	C (06)	F (06)	P (06)	O (06)	All (06)	LS07	Change Matrix (in %)	S (06)	C (06)	F (06)	P (06)	O (06)	All (06)
	S (00)	0.488166	0.0574705	0.00121665	0.0109606	0.00102653	0.55884		S (00)	0	0.257093	0.00544263	0.0490321	0.00459214	0.31616		S	12.9877
	C (00)	0.486916	42.4749	0.947947	1.24378	0.26607	45.4196		C (00)	2.17821	0	4.24061	5.564	1.19026	13.1731		C	2.28179
	F (00)	0.0677377	5.29781	19.647	3.34855	0.0687452	28.4299		F (00)	0.303023	23.6996	0	14.9797	0.30753	39.2898		F	2.28373
	P (00)	0.0376708	7.45047	2.36534	8.839	0.379814	19.0723		P (00)	0.168519	33.3295	10.5813	0	1.69909	45.7784		P	4.49217
	O (00)	0.000296978	0.217553	0.0595705	0.0450555	6.19692	6.5194		O (00)	0.00132852	0.973216	0.266487	0.201554	0	1.44259		O	5.86207
	All (00)	1.08079	55.4982	23.0211	13.4873	6.91258	100		All (00)	2.65108	58.2594	15.0938	20.7942	3.20147	100
							100								100
LS08								LS08
																	S
																	C
																	F
																	P
																	O
LS09								LS09
																	S
																	C
																	F
																	P
																	O
LS10	Conversion Matrix (in %)	S (06)	C (06)	F (06)	P (06)	O (06)	All (06)	LS10	Change Matrix (in %)	S (06)	C (06)	F (06)	P (06)	O (06)	All (06)
	S (00)	0.0755728	0.00721629	0.000436476	0.00214878	6.51066e-05	0.0854394		S (00)	0	0.0307825	0.00186188	0.00916607	0.000277725	0.0420882		S	10.0284
	C (00)	0.107685	20.4945	1.37839	1.63071	0.0801682	23.6914		C (00)	0.459353	0	5.87982	6.95612	0.341974	13.6373		C	3.21995
	F (00)	0.0103817	4.55111	39.403	5.85308	0.239053	50.0566		F (00)	0.0442852	19.4137	0	24.9675	1.01973	45.4452		F	1.21234
	P (00)	0.0126615	3.80367	5.20438	8.49207	0.221688	17.7345		P (00)	0.0540103	16.2253	22.2003	0	0.945653	39.4253		P	4.05148
	O (00)	3.25533e-05	0.0320535	0.227999	0.0798705	8.09211	8.43207		O (00)	0.000138863	0.136731	0.972577	0.340704	0	1.45015		O	2.67905
	All (00)	0.206334	28.8885	46.2142	16.0579	8.63309	100		All (00)	0.557788	35.8065	29.0546	32.2735	2.30763	100
							100								100
LS11								LS11
																	S
																	C
																	F
																	P
																	O
LS12								LS12
																	S
																	C
																	F
																	P
																	O
LS13	Conversion Matrix (in %)	S (06)	C (06)	F (06)	P (06)	O (06)	All (06)	LS13	Change Matrix (in %)	S (06)	C (06)	F (06)	P (06)	O (06)	All (06)
	S (00)	0	0	0	0	0	0		S (00)	0	0	0	0	0	0		S
	C (00)	0	0.400636	0.00364215	0.0534182	0	0.457696		C (00)	0	0	0.0189789	0.278358	0	0.297337		C
	F (00)	0	5.2714	31.7389	11.3708	0.231883	48.6129		F (00)	0	27.4688	0	59.2522	1.20833	87.9294		F
	P (00)	0	0.641018	1.56005	2.27634	0.00728429	4.4847		P (00)	0	3.34029	8.12931	0	0.0379579	11.5076		P
	O (00)	0	0.00971239	0.0315653	0.00971239	46.3937	46.4447		O (00)	0	0.0506105	0.164484	0.0506105	0	0.265705		O
	All (00)	0	6.32277	33.3341	13.7103	46.6328	100		All (00)	0	30.8597	8.31277	59.5812	1.24628	100
							100								100
LS14	Conversion Matrix (in %)	S (06)	C (06)	F (06)	P (06)	O (06)	All (06)	LS14	Change Matrix (in %)	S (06)	C (06)	F (06)	P (06)	O (06)	All (06)
	S (00)	0	0.0705817	0.0018528	0.000835965	0	0.0732705		S (00)	0	0.410256	0.0107694	0.00485905	0	0.425885		S
	C (00)	0.00217223	10.5029	0.68088	0.795083	0.0593134	12.0403		C (00)	0.0126261	0	3.95761	4.62142	0.344759	8.93642		C	3.16437
	F (00)	0.000846493	2.72912	55.393	8.53531	0.144426	66.8027		F (00)	0.00492024	15.863	0	49.6115	0.839477	66.3189		F	1.22177
	P (00)	0.000220293	1.23707	2.33581	8.55332	0.394445	12.5209		P (00)	0.00128045	7.19044	13.5769	0	2.29271	23.0613		P	7.3767
	O (00)	0.000231558	0.0125831	0.0952035	0.10832	8.34654	8.56288		O (00)	0.00134593	0.0731395	0.55337	0.62961	0	1.25747		O	1.6763
	All (00)	0.00347058	14.5522	58.5067	17.9929	8.94473	100		All (00)	0.0201727	23.5369	18.0986	54.8674	3.47695	100
							100								100
LS15	Conversion Matrix (in %)	S (06)	C (06)	F (06)	P (06)	O (06)	All (06)	LS15	Change Matrix (in %)	S (06)	C (06)	F (06)	P (06)	O (06)	All (06)
	S (00)	0.134778	0.0144191	0.000424247	0.00889096	0.000646935	0.159159		S (00)	0	0.0605127	0.00178045	0.0373129	0.00271501	0.102321		S	12.1078
	C (00)	0.128387	27.6392	2.23519	1.50189	0.0880252	31.5927		C (00)	0.538803	0	9.38046	6.30301	0.369417	16.5917		C	2.95702
	F (00)	0.0392947	5.45127	30.5885	4.68791	0.141155	40.9082		F (00)	0.164909	22.8775	0	19.6739	0.59239	43.3086		F	1.72282
	P (00)	0.0458736	5.70526	3.29327	10.757	0.238001	20.0394		P (00)	0.192519	23.9434	13.8209	0	0.998825	38.9556		P	4.05156
	O (00)	0.000159777	0.0453797	0.0975336	0.105146	7.05233	7.30055		O (00)	0.00067054	0.190446	0.409321	0.441267	0	1.0417		O	6.69746
	All (00)	0.348492	38.8555	36.2149	17.0609	7.52016	100		All (00)	0.896901	47.0718	23.6125	26.4555	1.96335	100
							100								100
LS16	Conversion Matrix (in %)	S (06)	C (06)	F (06)	P (06)	O (06)	All (06)	LS16	Change Matrix (in %)	S (06)	C (06)	F (06)	P (06)	O (06)	All (06)
	S (00)	0	0	0	0	0	0		S (00)	0	0	0	0	0	0		S
	C (00)	0	0.12679	0.000339465	0.000339465	0	0.127469		C (00)	0	0	0.00672955	0.00672955	0	0.0134591		C
	F (00)	0	0.00305519	0.667728	0.0846966	0	0.75548		F (00)	0	0.060566	0	1.67902	0	1.73959		F
	P (00)	0	0.268723	0.238711	20.1758	2.83629	23.5196		P (00)	0	5.32715	4.7322	0	56.2266	66.286		P
	O (00)	0	0.173378	0.00067893	1.43818	73.9853	75.5975		O (00)	0	3.43705	0.0134591	28.5105	0	31.961		O
	All (00)	0	0.571946	0.907457	21.699	76.8215	100		All (00)	0	8.82477	4.75239	30.1962	56.2266	100
							100								100
LS17	Conversion Matrix (in %)	S (06)	C (06)	F (06)	P (06)	O (06)	All (06)	LS17	Change Matrix (in %)	S (06)	C (06)	F (06)	P (06)	O (06)	All (06)
	S (00)	0.239918	0.00211942	0	0	0	0.242037		S (00)	0	0.0126076	0	0	0	0.0126076		S
	C (00)	0.451436	11.2469	1.23256	0.0541294	0.0301316	13.0151		C (00)	2.68543	0	7.33204	0.321996	0.179242	10.5187		C
	F (00)	0.10258	4.22772	11.8658	1.17172	0.232122	17.6		F (00)	0.61021	25.1492	0	6.97016	1.38081	34.1103		F	2.37404
	P (00)	0.047051	5.57816	1.80268	6.78337	1.81316	16.0244		P (00)	0.27989	33.1825	10.7235	0	10.7858	54.9716		P	6.20156
	O (00)	0.0122926	0.0178759	0.0194929	0.0153449	53.0535	53.1185		O (00)	0.0731244	0.106337	0.115956	0.0912815	0	0.386699		O	0.957103
	All (00)	0.853277	21.0727	14.9206	8.02457	55.1289	100		All (00)	3.64865	58.4506	18.1715	7.38344	12.3459	100
							100								100
LS18	Conversion Matrix (in %)	S (06)	C (06)	F (06)	P (06)	O (06)	All (06)	LS18	Change Matrix (in %)	S (06)	C (06)	F (06)	P (06)	O (06)	All (06)
	S (00)	0.499072	0.0422182	0.00178285	0.00801486	0.00564064	0.556728		S (00)	0	0.15199	0.00641844	0.0288543	0.0203068	0.207569		S	10
	C (00)	0.26343	39.9073	1.83226	2.31584	0.131469	44.4503		C (00)	0.948374	0	6.59632	8.33725	0.473302	16.3552		C	2.7208
	F (00)	0.0357223	7.575	16.3102	4.7861	0.116899	28.8239		F (00)	0.128604	27.2708	0	17.2304	0.420847	45.0507		F	2.59577
	P (00)	0.0348837	6.76288	3.23932	8.22812	0.401507	18.6667		P (00)	0.125585	24.347	11.6619	0	1.44547	37.5799		P	4.59056
	O (00)	0.00143534	0.112418	0.0737433	0.036447	7.27831	7.50235		O (00)	0.00516735	0.404714	0.265483	0.131213	0	0.806578		O	3.86588
	All (00)	0.834543	54.3998	21.4573	15.3745	7.93382	100		All (00)	1.20773	52.1745	18.5301	25.7278	2.35992	100
							100								100
LS19	Conversion Matrix (in %)	S (06)	C (06)	F (06)	P (06)	O (06)	All (06)	LS19	Change Matrix (in %)	S (06)	C (06)	F (06)	P (06)	O (06)	All (06)
	S (00)	0	0	0	0	0	0		S (00)	0	0	0	0	0	0		S
	C (00)	0.120239	52.4985	0.809411	2.51019	0.0139635	55.9523		C (00)	0.32937	0	2.21722	6.87617	0.0382501	9.46101		C	4.0751
	F (00)	0.00640339	15.1556	8.18225	3.65873	0.0317864	27.0348		F (00)	0.0175408	41.5158	0	10.0224	0.0870724	51.6427		F	7.15448
	P (00)	0.000120819	13.0029	1.17487	2.78607	0.00918501	16.9731		P (00)	0.000330958	35.6188	3.21831	0	0.0251605	38.8626		P	5.69363
	O (00)	4.83275e-05	0.00890339	0.0021029	0.00125194	0.027511	0.0398175		O (00)	0.000132383	0.024389	0.00576047	0.00342945	0	0.0337113		O
	All (00)	0.126811	80.6659	10.1686	8.95625	0.0824458	100		All (00)	0.347374	77.1589	5.44129	16.902	0.150483	100
							100								100
LS20	Conversion Matrix (in %)	S (06)	C (06)	F (06)	P (06)	O (06)	All (06)	LS20	Change Matrix (in %)	S (06)	C (06)	F (06)	P (06)	O (06)	All (06)
	S (00)	0	0	0	0	0	0		S (00)	0	0	0	0	0	0		S
	C (00)	0	0.0650949	0	0.00596107	0.00119221	0.0722481		C (00)	0	0	0	0.460011	0.0920022	0.552013		C
	F (00)	0	0.000476885	0.0219367	0.00119221	0	0.0236058		F (00)	0	0.0368009	0	0.0920022	0	0.128803		F
	P (00)	0	0.085124	0.0550803	0.879874	0.70084	1.72092		P (00)	0	6.56896	4.2505	0	54.0833	64.9028		P
	O (00)	0	0.0131143	0	0.432872	97.7372	98.1832		O (00)	0	1.01202	0	33.4044	0	34.4164		O
	All (00)	0	0.16381	0.077017	1.3199	98.4393	100		All (00)	0	7.61778	4.2505	33.9564	54.1753	100
							100								100
LS21								LS21
																	S
																	C
																	F
																	P
																	O
LS22	Conversion Matrix (in %)	S (06)	C (06)	F (06)	P (06)	O (06)	All (06)	LS22	Change Matrix (in %)	S (06)	C (06)	F (06)	P (06)	O (06)	All (06)
	S (00)	1.33907	0.0335595	0	0.0749911	0	1.44762		S (00)	0	0.164979	0	0.368657	0	0.533636		S
	C (00)	0.173598	38.706	0.389958	1.09191	0.35788	40.7193		C (00)	0.85341	0	1.91704	5.36782	1.75934	9.89761		C
	F (00)	0	2.76369	14.8255	0.541994	0.0101916	18.1414		F (00)	0	13.5863	0	2.66445	0.050102	16.3008		F
	P (00)	0.00704336	11.0814	3.61469	24.5426	0.192901	39.4387		P (00)	0.0346252	54.4763	17.7699	0	0.948301	73.229		P
	O (00)	0	0.000447433	0	0.00745768	0.245158	0.253064		O (00)	0	0.00219958	0	0.036662	0	0.0388616		O
	All (00)	1.51971	52.5851	18.8301	26.259	0.806131	100		All (00)	0.888035	68.2297	19.6869	8.43759	2.75774	100
							100								100
LS23	Conversion Matrix (in %)	S (06)	C (06)	F (06)	P (06)	O (06)	All (06)	LS23	Change Matrix (in %)	S (06)	C (06)	F (06)	P (06)	O (06)	All (06)
	S (00)	12.695	0.620624	0.00907688	0.0948142	0	13.4195		S (00)	0	3.51163	0.051359	0.53648	0	4.09947		S
	C (00)	2.64101	28.8039	0.617703	0.615149	0	32.6778		C (00)	14.9434	0	3.4951	3.48065	0	21.9192		C
	F (00)	2.01363	0.982661	22.9885	0.500567	0	26.4854		F (00)	11.3936	5.56012	0	2.83232	0	19.786		F
	P (00)	1.12105	6.7367	1.70317	17.8362	0	27.3971		P (00)	6.34315	38.1177	9.63694	0	0	54.0978		P
	O (00)	0	0.0116768	0.00453844	0.00101976	0.00302563	0.0202606		O (00)	0	0.0660699	0.0256795	0.00577005	0	0.0975194		O
	All (00)	18.4706	37.1556	25.323	19.0477	0.00302563	100		All (00)	32.6801	47.2556	13.2091	6.85522	0	100
							100								100

## Sheet: RCMRD_Namibia_00_10
24 Land Systems classification		WGT_AVG (temporarely normalized)	WGT_AVG	WGT_AVG	WGT_AVG	WGT_AVG
No PP LS Code	Land system name	settlement	cropland	forest	pasture	other land			Total area LS Urb	Total area LS Crop	Total area LS Forest	Total area LS Grassland	Total area LS Other
0	Cropland; extensive with few livestock
1	Cropland; extensive with bovines, goats & sheep
2	Cropland; medium intensive with few livestock
3	Cropland; medium intensive with bovines, goats & sheep
4	Cropland; intensive with few livestock
5	Cropland; intensive with bovines, goats & sheep
6	Mosaic cropland and grassland with bovines, goats & sheep		100		107.303	110.398				8.56164e+07		8.56164e+07	8.56164e+07
7	Mosaic cropland (extensive) and grassland with few livestock
8	Mosaic cropland (medium intensive) and grassland with few livestock
9	Mosaic cropland (intensive) and grassland with few livestock
10	Mosaic cropland (extensive) and forest with few livestock
11	Mosaic cropland (medium intensive) and forest with few livestock
12	Mosaic cropland (intensive) and forest with few livestock
13	Dense forest
14	Open forest with few livestock
15	Mosaic grassland and forest	183.258	101.541	440.653	597.746	175.255			9.81201e+09	9.81201e+09	9.81201e+09	9.81201e+09	9.81201e+09
16	Mosaic grassland and bare	104.339	161.543	304.758	559.718	460.6			2.76112e+11	2.76112e+11	2.76112e+11	2.76112e+11	2.76112e+11
17	Natural grassland		100	343.994	344.181	100				8.55579e+08	8.55579e+08	8.55579e+08	8.55579e+08
18	Grassland with few livestock	130.072	139.038	440.393	584.034	213.461			1.68141e+11	1.68141e+11	1.68141e+11	1.68141e+11	1.68141e+11
19	Grassland with bovines, goats and sheep			100	171.795	100					8.56164e+07	8.56164e+07	8.56164e+07
20	Bare	388.312	115.497	990.593	388.603	361.038			1.24888e+11	1.24888e+11	1.24888e+11	1.24888e+11	1.24888e+11
21	Bare with few livestock	103.698	150.232	153.383	877.599	372.179			2.45073e+11	2.45073e+11	2.45073e+11	2.45073e+11	2.45073e+11
22	Peri-urban & villages	100	100	149.422	256.456	148.028			7.40613e+08	7.40613e+08	7.40613e+08	7.40613e+08	7.40613e+08
23	Urban
								SUM	8.24768e+11	8.25709e+11	8.25709e+11	8.25795e+11	8.25795e+11
																		Net change fraction of total change per class
LS00								LS00										MED (normalized)
																	S
																	C
																	F
																	P
																	O
LS01								LS01
																	S
																	C
																	F
																	P
																	O
LS02								LS02
																	S
																	C
																	F
																	P
																	O
LS03								LS03
																	S
																	C
																	F
																	P
																	O
LS04								LS04
																	S
																	C
																	F
																	P
																	O
LS05								LS05
																	S
																	C
																	F
																	P
																	O
LS06	Conversion Matrix (in %)	S (06)	C (06)	F (06)	P (06)	O (06)	All (06)	LS06	Change Matrix (in %)	S (06)	C (06)	F (06)	P (06)	O (06)	All (06)
	S (00)	0	0	0	0	0	0		S (00)	0	0	0	0	0	0		S
	C (00)	0	0.790732	0	0	0	0.790732		C (00)	0	0	0	0	0	0		C
	F (00)	0	0	0	0	0	0		F (00)	0	0	0	0	0	0		F
	P (00)	0	3.27508	0	74.0808	20.301	97.6569		P (00)	0	13.3918	0	0	83.0108	96.4026		P
	O (00)	0	0.14126	0	0.738501	0.672635	1.5524		O (00)	0	0.577614	0	3.01974	0	3.59735		O
	All (00)	0	4.20707	0	74.8193	20.9736	100		All (00)	0	13.9694	0	3.01974	83.0108	100
							100								100
LS07								LS07
																	S
																	C
																	F
																	P
																	O
LS08								LS08
																	S
																	C
																	F
																	P
																	O
LS09								LS09
																	S
																	C
																	F
																	P
																	O
LS10								LS10
																	S
																	C
																	F
																	P
																	O
LS11								LS11
																	S
																	C
																	F
																	P
																	O
LS12								LS12
																	S
																	C
																	F
																	P
																	O
LS13								LS13
																	S
																	C
																	F
																	P
																	O
LS14								LS14
																	S
																	C
																	F
																	P
																	O
LS15	Conversion Matrix (in %)	S (06)	C (06)	F (06)	P (06)	O (06)	All (06)	LS15	Change Matrix (in %)	S (06)	C (06)	F (06)	P (06)	O (06)	All (06)
	S (00)	0.00579602	1.44621e-05	0.000647282	0.000100418	0	0.00655818		S (00)	0	4.27404e-05	0.00191294	0.000296767	0	0.00225244		S
	C (00)	0	2.47854	0.00235989	0	0	2.4809		C (00)	0	0	0.00697427	0	0	0.00697427		C	3.30431
	F (00)	0.00169127	0.310479	21.6448	15.2297	0.246182	37.4329		F (00)	0.00499827	0.917569	0	45.0089	0.727549	46.659		F	3.564
	P (00)	0.00808566	0.432064	17.3039	42.0246	0.0304787	59.7991		P (00)	0.0238958	1.27689	51.1387	0	0.0900746	52.5296		P	2.09103
	O (00)	2.26554e-05	0.00337941	0.147133	0.120897	0.00915001	0.280582		O (00)	6.69543e-05	0.00998728	0.434827	0.35729	0	0.802172		O	9.47842
	All (00)	0.0155956	3.22448	39.0988	57.3753	0.28581	100		All (00)	0.0289611	2.20449	51.5824	45.3665	0.817623	100
							100								100
LS16	Conversion Matrix (in %)	S (06)	C (06)	F (06)	P (06)	O (06)	All (06)	LS16	Change Matrix (in %)	S (06)	C (06)	F (06)	P (06)	O (06)	All (06)
	S (00)	0.0342124	0	3.23645e-05	0	0	0.0342448		S (00)	0	0	0.0001361	0	0	0.0001361		S	0.745236
	C (00)	0	1.36284	0.0214179	0.00933532	0.000188385	1.39378		C (00)	0	0	0.0900675	0.0392573	0.000792203	0.130117		C	4.39719
	F (00)	0.00061205	0.00835521	2.19111	7.50193	0.095203	9.79722		F (00)	0.00257382	0.0351356	0	31.5474	0.400351	31.9855		F	8.43696
	P (00)	0.00741988	0.549101	5.06103	69.6614	3.64361	78.9226		P (00)	0.0312024	2.3091	21.2829	0	15.3222	38.9454		P	1.10266
	O (00)	0.00318434	0.141015	0.261566	6.47586	2.97053	9.85216		O (00)	0.0133909	0.593001	1.09995	27.2325	0	28.9389		O	8.43971
	All (00)	0.0454287	2.06131	7.53516	83.6486	6.70953	100		All (00)	0.0471671	2.93724	22.473	58.8192	15.7234	100
							100								100
LS17	Conversion Matrix (in %)	S (06)	C (06)	F (06)	P (06)	O (06)	All (06)	LS17	Change Matrix (in %)	S (06)	C (06)	F (06)	P (06)	O (06)	All (06)
	S (00)	0	0	0	0	0	0		S (00)	0	0	0	0	0	0		S
	C (00)	0	0.0662709	0.00155648	0	0	0.0678273		C (00)	0	0	0.00537441	0	0	0.00537441		C
	F (00)	0	0	2.5595	18.8786	0	21.4381		F (00)	0	0	0	65.1865	0	65.1865		F	5.13447
	P (00)	0	0	10.0806	68.4133	0	78.494		P (00)	0	0	34.8077	0	0	34.8077		P	1.01264
	O (00)	0	0	0	0.000114516	0	0.000114516		O (00)	0	0	0	0.000395417	0	0.000395417		O
	All (00)	0	0.0662709	12.6417	87.292	0	100		All (00)	0	0	34.8131	65.1869	0	100
							100								100
LS18	Conversion Matrix (in %)	S (06)	C (06)	F (06)	P (06)	O (06)	All (06)	LS18	Change Matrix (in %)	S (06)	C (06)	F (06)	P (06)	O (06)	All (06)
	S (00)	0.0123448	7.25529e-06	8.89667e-05	1.76124e-05	0	0.0124587		S (00)	0	2.55612e-05	0.00031344	6.20504e-05	0	0.000401051		S	2.56944
	C (00)	0.000203159	1.45907	0.0285762	0.110346	0.000201485	1.5984		C (00)	0.000715752	0	0.100677	0.388763	0.000709853	0.490865		C	3.82191
	F (00)	0.00353346	0.0910991	8.18754	15.6868	0.0641323	24.0331		F (00)	0.0124488	0.320952	0	55.2664	0.225945	55.8257		F	5.65544
	P (00)	0.0129337	0.474512	10.4374	61.9061	0.379961	73.2109		P (00)	0.0455669	1.67176	36.772	0	1.33865	39.828		P	1.51229
	O (00)	0.00229051	0.0199758	0.176606	0.895336	0.0509614	1.14517		O (00)	0.00806971	0.070377	0.622201	3.15437	0	3.85502		O	9.15023
	All (00)	0.0313057	2.04467	18.8302	78.5986	0.495256	100		All (00)	0.0668012	2.06311	37.4952	58.8096	1.5653	100
							100								100
LS19	Conversion Matrix (in %)	S (06)	C (06)	F (06)	P (06)	O (06)	All (06)	LS19	Change Matrix (in %)	S (06)	C (06)	F (06)	P (06)	O (06)	All (06)
	S (00)	0	0	0	0	0	0		S (00)	0	0	0	0	0	0		S
	C (00)	0	0.217719	0	0	0	0.217719		C (00)	0	0	0	0	0	0		C
	F (00)	0	0	0	0.18712	0	0.18712		F (00)	0	0	0	79.1045	0	79.1045		F
	P (00)	0	0	0	99.5457	0.049428	99.5952		P (00)	0	0	0	0	20.8955	20.8955		P
	O (00)	0	0	0	0	0	0		O (00)	0	0	0	0	0	0		O
	All (00)	0	0.217719	0	99.7329	0.049428	100		All (00)	0	0	0	79.1045	20.8955	100
							100								100
LS20	Conversion Matrix (in %)	S (06)	C (06)	F (06)	P (06)	O (06)	All (06)	LS20	Change Matrix (in %)	S (06)	C (06)	F (06)	P (06)	O (06)	All (06)
	S (00)	0.0438736	0	0	0	0.000746759	0.0446204		S (00)	0	0	0	0	0.00263292	0.00263292		S	0.16003
	C (00)	7.52761e-06	0.0901328	5.8549e-06	0.0553099	0.0185975	0.164054		C (00)	2.65408e-05	0	2.06432e-05	0.195011	0.0655709	0.26063		C	9.30108
	F (00)	0	0	0.00906644	0.459224	0.042496	0.510786		F (00)	0	0	0	1.61913	0.149832	1.76896		F	10
	P (00)	0.00325529	0.0170774	0.0763387	15.0216	20.7001	35.8184		P (00)	0.0114775	0.0602115	0.269155	0	72.9844	73.3252		P	6.87888
	O (00)	0.00172812	0.0158277	0.00780251	6.96386	56.4729	63.4622		O (00)	0.006093	0.0558052	0.0275101	24.5532	0	24.6426		O	1.62545
	All (00)	0.0488646	0.123038	0.0932135	22.5	77.2349	100		All (00)	0.0175971	0.116017	0.296686	26.3673	73.2024	100
							100								100
LS21	Conversion Matrix (in %)	S (06)	C (06)	F (06)	P (06)	O (06)	All (06)	LS21	Change Matrix (in %)	S (06)	C (06)	F (06)	P (06)	O (06)	All (06)
	S (00)	0.034332	0	0	0	0.000137268	0.0344693		S (00)	0	0	0	0	0.000357889	0.000357889		S	0.840369
	C (00)	0	0.459746	0.000218355	0.0751973	0.00250602	0.537668		C (00)	0	0	0.000569301	0.196056	0.00653377	0.203159		C	6.73611
	F (00)	0	6.594e-07	0.0210502	0.229635	0.0248842	0.27557		F (00)	0	1.71921e-06	0	0.59871	0.0648786	0.663591		F	10
	P (00)	0.0109596	0.0472635	0.206437	31.7496	18.8951	50.9093		P (00)	0.0285742	0.123227	0.538229	0	49.2638	49.9538		P	4.51021
	O (00)	0.0128106	0.00541837	0.0482803	18.7961	29.3804	48.243		O (00)	0.0334003	0.0141269	0.125878	49.0057	0	49.1791		O	4.99493
	All (00)	0.0581023	0.512429	0.275986	50.8505	48.303	100		All (00)	0.0619744	0.137355	0.664676	49.8004	49.3356	100
							100								100
LS22	Conversion Matrix (in %)	S (06)	C (06)	F (06)	P (06)	O (06)	All (06)	LS22	Change Matrix (in %)	S (06)	C (06)	F (06)	P (06)	O (06)	All (06)
	S (00)	6.10556	0	0.0988856	0	0	6.20445		S (00)	0	0	0.457833	0	0	0.457833		S	1.57045
	C (00)	0.00036211	1.03994	0.000452638	0.0167476	0.00271583	1.06022		C (00)	0.00167654	0	0.00209568	0.0775402	0.0125741	0.0938865		C
	F (00)	0.129764	0.0251168	3.14604	3.28085	0.00968645	6.59146		F (00)	0.600798	0.116289	0	15.1901	0.0448476	15.952		F	10
	P (00)	0.921263	0.383662	8.1159	57.6011	4.68674	71.7086		P (00)	4.26538	1.77633	37.576	0	21.6993	65.317		P	2.35267
	O (00)	0.303701	0	0.0831358	3.53963	10.5088	14.4352		O (00)	1.40611	0	0.384913	16.3882	0	18.1793		O	8.51762
	All (00)	7.46065	1.44872	11.4444	64.4383	15.2079	100		All (00)	6.27397	1.89262	38.4209	31.6559	21.7567	100
							100								100
LS23								LS23
																	S
																	C
																	F
																	P
																	O

## Sheet: RCMRD_Rwanda_00_10
24 Land Systems classification		WGT_AVG (temporarely normalized)	WGT_AVG	WGT_AVG	WGT_AVG	WGT_AVG
No PP LS Code	Land system name	settlement	cropland	forest	pasture	other land			Total area LS Urb.	Total area LS Crop	Total area LS Forest	Total area LS Grassland	Total area LS Other
0	Cropland; extensive with few livestock	360.455	897.756	620.563	528.911	100			2.69776e+09	2.69776e+09	2.69776e+09	2.69776e+09	2.69776e+09
1	Cropland; extensive with bovines, goats & sheep	381.631	266.377	331.415	300.093	100			2.343e+09	2.343e+09	2.343e+09	2.343e+09	2.343e+09
2	Cropland; medium intensive with few livestock
3	Cropland; medium intensive with bovines, goats & sheep
4	Cropland; intensive with few livestock
5	Cropland; intensive with bovines, goats & sheep
6	Mosaic cropland and grassland with bovines, goats & sheep	469.887	488.883	335.928	344.269	100			9.6252e+08	9.6252e+08	9.6252e+08	9.6252e+08	9.6252e+08
7	Mosaic cropland (extensive) and grassland with few livestock	184.381	719.062	535.253	332.934	100			1.56375e+09	1.56375e+09	1.56375e+09	1.56375e+09	1.56375e+09
8	Mosaic cropland (medium intensive) and grassland with few livestock
9	Mosaic cropland (intensive) and grassland with few livestock
10	Mosaic cropland (extensive) and forest with few livestock	346.782	452.726	598.786	952.701	158.842			8.64763e+09	8.64763e+09	8.64763e+09	8.64763e+09	8.64763e+09
11	Mosaic cropland (medium intensive) and forest with few livestock
12	Mosaic cropland (intensive) and forest with few livestock
13	Dense forest		304.945	734.8	1159.88					2.08218e+08	2.08218e+08	2.08218e+08
14	Open forest with few livestock	186.407	266.478	198.647	251.658	100			1.86362e+09	1.86362e+09	1.86362e+09	1.86362e+09	1.86362e+09
15	Mosaic grassland and forest	121.777	1041.99	651.492	870.956	100			4.41294e+09	4.41294e+09	4.41294e+09	4.41294e+09	4.41294e+09
16	Mosaic grassland and bare
17	Natural grassland		161.845	284.944	174.457					8.71892e+07	8.71892e+07	8.71892e+07
18	Grassland with few livestock	113.517	388.518	231.66	363.68	261.153			2.05965e+09	2.05965e+09	2.05965e+09	2.05965e+09	2.05965e+09
19	Grassland with bovines, goats and sheep		467.018	916.141	178.97					8.73011e+07	8.73011e+07	8.73011e+07
20	Bare
21	Bare with few livestock
22	Peri-urban & villages	100	200.613	375.454	230.452				1.98959e+08	1.98959e+08	1.98959e+08	1.98959e+08
23	Urban	1772.87	281.347	168.086	195.911				1.33337e+08	1.33337e+08	1.33337e+08	1.33337e+08
								SUM	2.48832e+10	2.52659e+10	2.52659e+10	2.52659e+10	2.45509e+10
																		Net change fraction of total change per class
LS00	Conversion Matrix (in %)	S (06)	C (06)	F (06)	P (06)	O (06)	All (06)	LS00	Change Matrix (in %)	S (06)	C (06)	F (06)	P (06)	O (06)	All (06)			MED (normalized)
	S (00)	0.0804926	0.0225089	0.00294294	0.00281126	0	0.108756		S (00)	0	0.0618571	0.00808752	0.00772565	0	0.0776702		S	1.28989
	C (00)	0.332606	42.352	10.7405	4.80459	0.00128178	58.231		C (00)	0.914039	0	29.5161	13.2035	0.00352248	43.6372		C	1.18719
	F (00)	0.0533836	11.3864	17.4518	2.92981	0.00170319	31.8231		F (00)	0.146704	31.2912	0	8.05144	0.00468055	39.494		F	1.7779
	P (00)	0.0994631	5.10608	0.898025	3.7271	0.00649214	9.83717		P (00)	0.273336	14.0321	2.46787	0	0.0178411	16.7911		P	2.53628
	O (00)	0	0	0	0	0	0		O (00)	0	0	0	0	0	0		O
	All (00)	0.565946	58.867	29.0932	11.4643	0.0094771	100		All (00)	1.33408	45.3851	31.992	21.2627	0.0260441	100
							100								100
LS01	Conversion Matrix (in %)	S (06)	C (06)	F (06)	P (06)	O (06)	All (06)	LS01	Change Matrix (in %)	S (06)	C (06)	F (06)	P (06)	O (06)	All (06)
	S (00)	0.107156	0.0155697	0.00820252	0.00434911	0	0.135278		S (00)	0	0.0495702	0.0261148	0.0138465	0	0.0895315		S
	C (00)	0.113964	47.7096	13.2111	2.64706	0.00294214	63.6846		C (00)	0.362834	0	42.0609	8.4276	0.00936706	50.8607		C	1.64954
	F (00)	0.00992197	6.18851	5.45566	2.59771	0.0012441	14.253		F (00)	0.0315892	19.7027	0	8.27049	0.00396093	28.0088		F	4.82137
	P (00)	0.0234101	5.4732	1.10316	15.3182	0.0090786	21.927		P (00)	0.0745321	17.4254	3.51218	0	0.0289041	21.041		P	3.9722
	O (00)	0	0	0	0	0	0		O (00)	0	0	0	0	0	0		O
	All (00)	0.254452	59.3869	19.7781	20.5673	0.0132648	100		All (00)	0.468955	37.1777	45.5992	16.7119	0.0422321	100
							100								100
LS02								LS02
																	S
																	C
																	F
																	P
																	O
LS03								LS03
																	S
																	C
																	F
																	P
																	O
LS04								LS04
																	S
																	C
																	F
																	P
																	O
LS05								LS05
																	S
																	C
																	F
																	P
																	O
LS06	Conversion Matrix (in %)	S (06)	C (06)	F (06)	P (06)	O (06)	All (06)	LS06	Change Matrix (in %)	S (06)	C (06)	F (06)	P (06)	O (06)	All (06)
	S (00)	0.141989	0.0278128	0.00752697	0.0100324	0	0.187361		S (00)	0	0.0832639	0.0225337	0.0300342	0	0.135832		S
	C (00)	0.066564	33.5685	9.0587	3.33215	0.0256368	46.0516		C (00)	0.199274	0	27.1193	9.97556	0.0767494	37.3709		C	1.36575
	F (00)	0.00505902	11.952	10.6134	1.81219	0.0214487	24.4042		F (00)	0.0151453	35.7811	0	5.42519	0.0642114	41.2856		F	3.67328
	P (00)	0.0794952	5.18247	1.77113	22.2729	0.0507114	29.3567		P (00)	0.237987	15.5149	5.30228	0	0.151816	21.207		P	2.29768
	O (00)	0	0	0	0.000238501	0	0.000238501		O (00)	0	0	0	0.000714008	0	0.000714008		O
	All (00)	0.293107	50.7308	21.4508	27.4275	0.0977968	100		All (00)	0.452407	51.3792	32.4441	15.4315	0.292777	100
							100								100
LS07	Conversion Matrix (in %)	S (06)	C (06)	F (06)	P (06)	O (06)	All (06)	LS07	Change Matrix (in %)	S (06)	C (06)	F (06)	P (06)	O (06)	All (06)
	S (00)	0.56735	0.0474147	0.0215928	0.00367236	0	0.640029		S (00)	0	0.127964	0.0582752	0.00991107	0	0.19615		S	5.29412
	C (00)	0.196556	38.1645	14.4244	4.19408	0.00410578	56.9836		C (00)	0.530471	0	38.9289	11.3191	0.0110808	50.7895		C	1.56396
	F (00)	0.0840372	13.5587	12.0314	1.99497	0.0071391	27.6762		F (00)	0.226802	36.5925	0	5.38408	0.0192672	42.2226		F	3.30905
	P (00)	0.0976702	1.65081	0.762775	12.1836	0.00529073	14.7001		P (00)	0.263595	4.45524	2.0586	0	0.0142788	6.79171		P	10.5902
	O (00)	0	0	0	0	0	0		O (00)	0	0	0	0	0	0		O
	All (00)	0.945613	53.4214	27.2401	18.3763	0.0165356	100		All (00)	1.02087	41.1757	41.0457	16.7131	0.0446267	100
							100								100
LS08								LS08
																	S
																	C
																	F
																	P
																	O
LS09								LS09
																	S
																	C
																	F
																	P
																	O
LS10	Conversion Matrix (in %)	S (06)	C (06)	F (06)	P (06)	O (06)	All (06)	LS10	Change Matrix (in %)	S (06)	C (06)	F (06)	P (06)	O (06)	All (06)
	S (00)	0.264693	0.0214774	0.0081082	0.00861322	0	0.302891		S (00)	0	0.0557484	0.0210462	0.0223571	0	0.0991517		S	4.73768
	C (00)	0.173779	25.6661	10.7969	3.62513	0.0279848	40.2899		C (00)	0.451074	0	28.0253	9.40965	0.0726395	37.9587		C	1.47271
	F (00)	0.093341	13.2021	18.8695	4.4707	0.160348	36.796		F (00)	0.242283	34.2683	0	11.6045	0.416211	46.5312		F	3.27199
	P (00)	0.042184	3.21637	1.79778	16.64	0.511883	22.2083		P (00)	0.109496	8.34865	4.66643	0	1.32868	14.4533		P	2.28349
	O (00)	0	0	0.0718391	0.297128	0.0340188	0.402985		O (00)	0	0	0.186471	0.771245	0	0.957716		O
	All (00)	0.573997	42.106	31.5442	25.0416	0.734234	100		All (00)	0.802852	42.6727	32.8992	21.8077	1.81753	100
							100								100
LS11								LS11
																	S
																	C
																	F
																	P
																	O
LS12								LS12
																	S
																	C
																	F
																	P
																	O
LS13	Conversion Matrix (in %)	S (06)	C (06)	F (06)	P (06)	O (06)	All (06)	LS13	Change Matrix (in %)	S (06)	C (06)	F (06)	P (06)	O (06)	All (06)
	S (00)	0	0	0	0	0	0		S (00)	0	0	0	0	0	0		S
	C (00)	0	0.000196479	0.0723044	0.000982397	0	0.0734833		C (00)	0	0	0.360062	0.00489214	0	0.364954		C
	F (00)	0	0.144805	31.2782	16.3054	0	47.7283		F (00)	0	0.721102	0	81.1976	0	81.9187		F
	P (00)	0	0	3.55765	48.6405	0	52.1982		P (00)	0	0	17.7164	0	0	17.7164		P
	O (00)	0	0	0	0	0	0		O (00)	0	0	0	0	0	0		O
	All (00)	0	0.145002	34.9081	64.9469	0	100		All (00)	0	0.721102	18.0765	81.2024	0	100
							100								100
LS14	Conversion Matrix (in %)	S (06)	C (06)	F (06)	P (06)	O (06)	All (06)	LS14	Change Matrix (in %)	S (06)	C (06)	F (06)	P (06)	O (06)	All (06)
	S (00)	0.16774	0.0311576	0.0036983	0.000355829	0	0.202952		S (00)	0	0.126315	0.0149931	0.00144255	0	0.14275		S
	C (00)	0.0288227	15.3254	2.04751	1.71265	0	19.1144		C (00)	0.116849	0	8.3007	6.94318	0	15.3607		C	5.94045
	F (00)	0.0168671	16.4803	30.3745	2.68714	0.000271758	49.559		F (00)	0.0683803	66.8121	0	10.8938	0.00110172	77.7753		F	2.32342
	P (00)	0.0344426	0.593642	1.02981	29.4657	0	31.1236		P (00)	0.139632	2.40666	4.17489	0	0	6.72118		P	3.17828
	O (00)	0	0	0	0	0	0		O (00)	0	0	0	0	0	0		O
	All (00)	0.247872	32.4305	33.4555	33.8659	0.000271758	100		All (00)	0.324861	69.345	12.4906	17.8384	0.00110172	100
							100								100
LS15	Conversion Matrix (in %)	S (06)	C (06)	F (06)	P (06)	O (06)	All (06)	LS15	Change Matrix (in %)	S (06)	C (06)	F (06)	P (06)	O (06)	All (06)
	S (00)	0.0676945	0.0077971	0.000313161	0.00135489	0	0.0771597		S (00)	0	0.0268007	0.00107642	0.00465714	0	0.0325343		S	5.29412
	C (00)	0.139711	21.1125	8.53542	3.23675	0.00731944	33.0317		C (00)	0.480224	0	29.3385	11.1256	0.0251589	40.9695		C	1.64155
	F (00)	0.0351661	6.81355	22.2154	3.33777	0.0016043	32.4035		F (00)	0.120875	23.42	0	11.4728	0.00551441	35.0192		F	2.58564
	P (00)	0.0479684	4.0608	2.82522	27.5116	0.0421324	34.4877		P (00)	0.16488	13.958	9.71104	0	0.144821	23.9788		P	1.29262
	O (00)	0	0	0	0	0	0		O (00)	0	0	0	0	0	0		O
	All (00)	0.29054	31.9946	33.5763	34.0875	0.0510562	100		All (00)	0.76598	37.4048	39.0507	22.603	0.175494	100
							100								100
LS16
																	S
																	C
																	F
																	P
																	O
LS17	Conversion Matrix (in %)	S (06)	C (06)	F (06)	P (06)	O (06)	All (06)	LS17	Change Matrix (in %)	S (06)	C (06)	F (06)	P (06)	O (06)	All (06)
	S (00)	0	0	0	0	0	0		S (00)	0	0	0	0	0	0		S
	C (00)	0	29.2868	7.58715	7.33447	0	44.2084		C (00)	0	0	32.7536	31.6628	0	64.4164		C
	F (00)	0	3.0704	4.94441	3.45684	0	11.4717		F (00)	0	13.2549	0	14.9231	0	28.178		F
	P (00)	0	0.606352	1.10912	42.6045	0	44.32		P (00)	0	2.61761	4.78807	0	0	7.40568		P
	O (00)	0	0	0	0	0	0		O (00)	0	0	0	0	0	0		O
	All (00)	0	32.9635	13.6407	53.3958	0	100		All (00)	0	15.8725	37.5416	46.5859	0	100
							100								100
LS18	Conversion Matrix (in %)	S (06)	C (06)	F (06)	P (06)	O (06)	All (06)	LS18	Change Matrix (in %)	S (06)	C (06)	F (06)	P (06)	O (06)	All (06)
	S (00)	0.455308	0.0383359	0.00383705	7.30821e-05	0	0.497554		S (00)	0	0.129506	0.0129622	0.000246885	0	0.142715		S
	C (00)	0.292286	17.1998	3.96502	3.38002	0.00149015	24.8386		C (00)	0.987396	0	13.3946	11.4183	0.00503399	25.8053		C	4.9238
	F (00)	0.188685	9.21543	7.8238	3.22947	0.0139959	20.4714		F (00)	0.637412	31.1314	0	10.9097	0.0472808	42.7258		F	4.14186
	P (00)	0.253536	6.35622	2.34451	44.9173	0.18794	54.0595		P (00)	0.856491	21.4725	7.92019	0	0.634896	30.884		P	0.66855
	O (00)	0	0.000262582	0.0119803	0.118628	0.00210066	0.132971		O (00)	0	0.000887051	0.0404717	0.400745	0	0.442104		O
	All (00)	1.18981	32.8101	14.1491	51.6455	0.205527	100		All (00)	2.4813	52.7343	21.3682	22.729	0.68721	100
							100								100
LS19	Conversion Matrix (in %)	S (06)	C (06)	F (06)	P (06)	O (06)	All (06)	LS19	Change Matrix (in %)	S (06)	C (06)	F (06)	P (06)	O (06)	All (06)
	S (00)	0	0	0	0	0	0		S (00)	0	0	0	0	0	0		S
	C (00)	0	41.1272	12.2216	0.300788	0	53.6496		C (00)	0	0	31.2117	0.768155	0	31.9798		C
	F (00)	0	19.3086	18.7914	1.48802	0	39.588		F (00)	0	49.3104	0	3.80012	0	53.1105		F
	P (00)	0	5.3841	0.454093	0.924187	0	6.76238		P (00)	0	13.75	1.15967	0	0	14.9096		P
	O (00)	0	0	0	0	0	0		O (00)	0	0	0	0	0	0		O
	All (00)	0	65.8199	31.4671	2.713	0	100		All (00)	0	63.0604	32.3713	4.56828	0	100
							100								100
LS20								LS20
																	S
																	C
																	F
																	P
																	O
LS21								LS21
																	S
																	C
																	F
																	P
																	O
LS22	Conversion Matrix (in %)	S (06)	C (06)	F (06)	P (06)	O (06)	All (06)	LS22	Change Matrix (in %)	S (06)	C (06)	F (06)	P (06)	O (06)	All (06)
	S (00)	0	0	0	0	0	0		S (00)	0	0	0	0	0	0		S
	C (00)	0.0332301	30.3223	17.954	4.58464	0	52.8942		C (00)	0.0733467	0	39.6288	10.1194	0	49.8215		C
	F (00)	0.000781885	14.6936	16.505	5.41175	0	36.611		F (00)	0.00172581	32.4321	0	11.945	0	44.3789		F
	P (00)	0.0125102	1.29277	1.32228	7.86717	0	10.4947		P (00)	0.0276129	2.85344	2.91858	0	0	5.79963		P
	O (00)	0	0	0	0	0	0		O (00)	0	0	0	0	0	0		O
	All (00)	0.0465222	46.3087	35.7813	17.8635	0	100		All (00)	0.102685	35.2856	42.5474	22.0644	0	100
							100								100
LS23	Conversion Matrix (in %)	S (06)	C (06)	F (06)	P (06)	O (06)	All (06)	LS23	Change Matrix (in %)	S (06)	C (06)	F (06)	P (06)	O (06)	All (06)
	S (00)	25.6205	2.70342	0.320711	0.183486	0	28.8281		S (00)	0	8.05949	0.956112	0.547014	0	9.56261		S
	C (00)	0.350721	12.5857	3.84102	1.7082	0	18.4857		C (00)	1.04558	0	11.4509	5.09252	0	17.589		C
	F (00)	6.42985	9.94729	15.9578	5.55336	0	37.8883		F (00)	19.1688	29.6551	0	16.5558	0	65.3797		F
	P (00)	0.595857	0.598989	1.31037	12.2926	0	14.7978		P (00)	1.77638	1.78572	3.90652	0	0	7.46862		P
	O (00)	0	0	0	0	0	0		O (00)	0	0	0	0	0	0		O
	All (00)	32.9969	25.8354	21.4299	19.7377	0	100		All (00)	21.9908	39.5003	16.3136	22.1953	0	100
							100								100

## Sheet: RCMRD_Rwanda_90_00
24 Land Systems classification		WGT_AVG (temporarely normalized)	WGT_AVG	WGT_AVG	WGT_AVG	WGT_AVG
No PP LS Code	Land system name	settlement	cropland	forest	pasture	other land			Total area LS Urb.	Total area LS Crop	Total area LS Forest	Total area LS Grassland	Total area LS Other
0	Cropland; extensive with few livestock	194.344	183.806	231.886	213.702	100			2.69776e+09	2.69776e+09	2.69776e+09	2.69776e+09	2.69776e+09
1	Cropland; extensive with bovines, goats & sheep	125.617	132.74	146.041	241.196	100			2.343e+09	2.343e+09	2.343e+09	2.343e+09	2.343e+09
2	Cropland; medium intensive with few livestock
3	Cropland; medium intensive with bovines, goats & sheep
4	Cropland; intensive with few livestock
5	Cropland; intensive with bovines, goats & sheep
6	Mosaic cropland and grassland with bovines, goats & sheep	172.275	275.357	263.424	198.346	118.519			9.6252e+08	9.6252e+08	9.6252e+08	9.6252e+08	9.6252e+08
7	Mosaic cropland (extensive) and grassland with few livestock	260.055	155.404	173.05	202.032	100			1.56375e+09	1.56375e+09	1.56375e+09	1.56375e+09	1.56375e+09
8	Mosaic cropland (medium intensive) and grassland with few livestock
9	Mosaic cropland (intensive) and grassland with few livestock
10	Mosaic cropland (extensive) and forest with few livestock	291.874	218.406	633.929	230.553	283.471			8.64763e+09	8.64763e+09	8.64763e+09	8.64763e+09	8.64763e+09
11	Mosaic cropland (medium intensive) and forest with few livestock
12	Mosaic cropland (intensive) and forest with few livestock
13	Dense forest		126.051	664.499	730.054					2.08218e+08	2.08218e+08	2.08218e+08
14	Open forest with few livestock	125.061	484.477	319.215	351.373				1.86362e+09	1.86362e+09	1.86362e+09	1.86362e+09
15	Mosaic grassland and forest	318.901	212.251	606.105	385.244	100			4.41294e+09	4.41294e+09	4.41294e+09	4.41294e+09	4.41294e+09
16	Mosaic grassland and bare
17	Natural grassland		101.84	108.671	107.568					8.71892e+07	8.71892e+07	8.71892e+07
18	Grassland with few livestock	125	395.589	266.399	1654.7	103.047			2.05965e+09	2.05965e+09	2.05965e+09	2.05965e+09	2.05965e+09
19	Grassland with bovines, goats and sheep		173.516	579.414	273.663					8.73011e+07	8.73011e+07	8.73011e+07
20	Bare
21	Bare with few livestock
22	Peri-urban & villages		384.354	259.237	106.676					1.98959e+08	1.98959e+08	1.98959e+08
23	Urban	2888.75	159.634	259.042	128.823				1.33337e+08	1.33337e+08	1.33337e+08	1.33337e+08
								SUM	2.46842e+10	2.52659e+10	2.52659e+10	2.52659e+10	2.26873e+10
																		Net change fraction of total change per class
LS00	Conversion Matrix (in %)	S (06)	C (06)	F (06)	P (06)	O (06)	All (06)	LS00	Change Matrix (in %)	S (06)	C (06)	F (06)	P (06)	O (06)	All (06)			MED (normalized)
	S (00)	0.0737494	0.00803567	0.00449538	0.0139439	0	0.100224		S (00)	0	0.0156358	0.00874711	0.0271319	0	0.0515149		S	5.62353
	C (00)	0.0109014	25.0815	10.2466	2.3095	0	37.6485		C (00)	0.021212	0	19.9378	4.49382	0	24.4528		C	9.45856
	F (00)	0.0236777	22.4146	17.6824	1.74193	0	41.8626		F (00)	0.0460722	43.6144	0	3.38944	0	47.0499		F	5.33909
	P (00)	0.000427088	10.7249	3.88965	5.76956	0	20.3845		P (00)	0.000831027	20.8685	7.56848	0	0	28.4378		P	6.14466
	O (00)	0	0.00186396	0	0.00223675	0	0.00410071		O (00)	0	0.00362689	0	0.00435227	0	0.00797917		O
	All (00)	0.108756	58.231	31.8231	9.83717	0	100		All (00)	0.0681152	64.5021	27.515	7.91475	0	100
							100								100
LS01	Conversion Matrix (in %)	S (06)	C (06)	F (06)	P (06)	O (06)	All (06)	LS01	Change Matrix (in %)	S (06)	C (06)	F (06)	P (06)	O (06)	All (06)
	S (00)	0.05728	0.00348965	0.00358978	0.0215615	0	0.0859209		S (00)	0	0.00731181	0.00752161	0.0451775	0	0.060011		S
	C (00)	0.000409125	25.5766	2.76663	1.97311	0	30.3168		C (00)	0.000857233	0	5.79688	4.13422	0	9.93195		C	11.839
	F (00)	0.0665082	32.1399	8.34522	1.57642	0	42.128		F (00)	0.139354	67.3421	0	3.30305	0	70.7845		F	6.20865
	P (00)	0.0110805	5.91726	3.13399	18.2946	0	27.357		P (00)	0.0232168	12.3983	6.56659	0	0	18.9882		P	3.18468
	O (00)	0	0.0474142	0.00361501	0.0612979	0	0.112327		O (00)	0	0.0993462	0.00757446	0.128436	0	0.235357		O
	All (00)	0.135278	63.6846	14.253	21.927	0	100		All (00)	0.163428	79.8471	12.3786	7.61088	0	100
							100								100
LS02								LS02
																	S
																	C
																	F
																	P
																	O
LS03								LS03
																	S
																	C
																	F
																	P
																	O
LS04								LS04
																	S
																	C
																	F
																	P
																	O
LS05								LS05
																	S
																	C
																	F
																	P
																	O
LS06	Conversion Matrix (in %)	S (06)	C (06)	F (06)	P (06)	O (06)	All (06)	LS06	Change Matrix (in %)	S (06)	C (06)	F (06)	P (06)	O (06)	All (06)
	S (00)	0.0675438	0.013312	0.000607825	0.01499	0	0.0964537		S (00)	0	0.0321223	0.0014667	0.0361712	0	0.0697602		S
	C (00)	0.00807538	21.3737	9.50161	2.10705	0	32.9904		C (00)	0.0194861	0	22.9277	5.08437	0	28.0315		C	6.32704
	F (00)	0.0863763	18.2436	13.6143	3.31333	0	35.2576		F (00)	0.208429	44.0223	0	7.99517	0	52.2259		F	5.238
	P (00)	0.0253653	6.17197	1.28054	23.5028	0.000238501	30.9809		P (00)	0.0612072	14.8931	3.08999	0	0.00057551	18.0449		P	4.98625
	O (00)	0	0.249004	0.00712118	0.418523	0	0.674649		O (00)	0	0.600854	0.0171836	1.00991	0	1.62795		O
	All (00)	0.187361	46.0516	24.4042	29.3567	0.000238501	100		All (00)	0.289122	59.5484	26.0363	14.1256	0.00057551	100
							100								100
LS07	Conversion Matrix (in %)	S (06)	C (06)	F (06)	P (06)	O (06)	All (06)	LS07	Change Matrix (in %)	S (06)	C (06)	F (06)	P (06)	O (06)	All (06)
	S (00)	0.374525	0.016973	0.0332843	0.0508957	0	0.475678		S (00)	0	0.0339598	0.0665955	0.101832	0	0.202388		S	5.42484
	C (00)	0.00469975	18.7463	6.96841	1.00341	0	26.7228		C (00)	0.00940329	0	13.9424	2.00762	0	15.9595		C	12.5936
	F (00)	0.249712	31.8857	18.4917	1.21447	0	51.8416		F (00)	0.499625	63.7973	0	2.42992	0	66.7268		F	5.15092
	P (00)	0.0110228	6.24736	2.18001	12.4077	0	20.8461		P (00)	0.0220546	12.4998	4.36179	0	0	16.8836		P	6.37555
	O (00)	7.05904e-05	0.0872388	0.00285532	0.023637	0	0.113802		O (00)	0.000141238	0.174548	0.00571294	0.0472931	0	0.227695		O
	All (00)	0.640029	56.9836	27.6762	14.7001	0	100		All (00)	0.531224	76.5056	18.3765	4.58667	0	100
							100								100
LS08								LS08
																	S
																	C
																	F
																	P
																	O
LS09								LS09
																	S
																	C
																	F
																	P
																	O
LS10	Conversion Matrix (in %)	S (06)	C (06)	F (06)	P (06)	O (06)	All (06)	LS10	Change Matrix (in %)	S (06)	C (06)	F (06)	P (06)	O (06)	All (06)
	S (00)	0.219561	0.00658661	0.0651496	0.0167153	0	0.308013		S (00)	0	0.015817	0.156449	0.0401397	0	0.212406		S	5.03978
	C (00)	0.00402301	16.0935	8.3521	1.57341	1.56911e-05	26.0231		C (00)	0.00966077	0	20.0566	3.77835	3.76803e-05	23.8446		C	7.87982
	F (00)	0.071106	17.7377	25.2767	3.65062	0.290603	47.0268		F (00)	0.170753	42.5951	0	8.76653	0.697848	52.2302		F	3.65411
	P (00)	0.0081586	6.31476	3.05443	16.7554	0.100256	26.233		P (00)	0.0195919	15.1642	7.33485	0	0.240753	22.7594		P	4.51265
	O (00)	4.25314e-05	0.137272	0.0475663	0.212123	0.0121111	0.409115		O (00)	0.000102134	0.329643	0.114225	0.509389	0	0.953359		O
	All (00)	0.302891	40.2899	36.796	22.2083	0.402985	100		All (00)	0.200107	58.1047	27.6621	13.0944	0.938639	100
							100								100
LS11								LS11
																	S
																	C
																	F
																	P
																	O
LS12								LS12
																	S
																	C
																	F
																	P
																	O
LS13	Conversion Matrix (in %)	S (06)	C (06)	F (06)	P (06)	O (06)	All (06)	LS13	Change Matrix (in %)	S (06)	C (06)	F (06)	P (06)	O (06)	All (06)
	S (00)	0	0	0	0	0	0		S (00)	0	0	0	0	0	0		S
	C (00)	0	0.00530495	0.329889	0.062708	0	0.397902		C (00)	0	0	1.73094	0.329031	0	2.05997		C
	F (00)	0	0.0656241	30.6906	1.88975	0	32.646		F (00)	0	0.344332	0	9.9156	0	10.2599		F
	P (00)	0	0.00255423	16.7078	50.2457	0	66.9561		P (00)	0	0.0134022	87.6667	0	0	87.6801		P
	O (00)	0	0	0	0	0	0		O (00)	0	0	0	0	0	0		O
	All (00)	0	0.0734833	47.7283	52.1982	0	100		All (00)	0	0.357735	89.3976	10.2446	0	100
							100								100
LS14	Conversion Matrix (in %)	S (06)	C (06)	F (06)	P (06)	O (06)	All (06)	LS14	Change Matrix (in %)	S (06)	C (06)	F (06)	P (06)	O (06)	All (06)
	S (00)	0.0501218	0.00492915	0.000582044	0.025455	0	0.081088		S (00)	0	0.0230898	0.00272649	0.11924	0	0.145056		S
	C (00)	0.00299683	9.92989	6.79836	0.228544	0	16.9598		C (00)	0.0140382	0	31.8458	1.07058	0	32.9305		C	7.35077
	F (00)	0.148658	6.31718	38.9902	1.18758	0	46.6436		F (00)	0.696365	29.5918	0	5.56301	0	35.8512		F	1.89143
	P (00)	0.00117498	2.86241	3.76987	29.682	0	36.3155		P (00)	0.00550402	13.4085	17.6593	0	0	31.0733		P	3.14936
	O (00)	0	0	0	0	0	0		O (00)	0	0	0	0	0	0		O
	All (00)	0.202952	19.1144	49.559	31.1236	0	100		All (00)	0.715907	43.0234	49.5079	6.75283	0	100
							100								100
LS15	Conversion Matrix (in %)	S (06)	C (06)	F (06)	P (06)	O (06)	All (06)	LS15	Change Matrix (in %)	S (06)	C (06)	F (06)	P (06)	O (06)	All (06)
	S (00)	0.0478161	0.00356881	0.00626399	0.0117351	0	0.0693841		S (00)	0	0.0108857	0.0191066	0.0357947	0	0.065787		S	4.09524
	C (00)	0.0012979	12.7594	3.5627	0.556077	0	16.8795		C (00)	0.00395888	0	10.867	1.69616	0	12.5671		C	14.713
	F (00)	0.0260842	13.9604	25.083	4.55969	0	43.6291		F (00)	0.0795627	42.5822	0	13.9081	0	56.5698		F	3.6035
	P (00)	0.00196144	6.30099	3.7504	29.3254	0	39.3787		P (00)	0.00598283	19.2194	11.4396	0	0	30.665		P	1.78949
	O (00)	0	0.00735049	0.00112483	0.0348789	0	0.0433542		O (00)	0	0.0224206	0.00343099	0.106388	0	0.13224		O
	All (00)	0.0771597	33.0317	32.4035	34.4877	0	100		All (00)	0.0895044	61.8349	22.3291	15.7464	0	100
							100								100
LS16								LS16
																	S
																	C
																	F
																	P
																	O
LS17	Conversion Matrix (in %)	S (06)	C (06)	F (06)	P (06)	O (06)	All (06)	LS17	Change Matrix (in %)	S (06)	C (06)	F (06)	P (06)	O (06)	All (06)
	S (00)	0	0	0	0	0	0		S (00)	0	0	0	0	0	0		S
	C (00)	0	4.9681	0.172992	0.499625	0	5.64072		C (00)	0	0	0.35628	1.02898	0	1.38526		C
	F (00)	0	23.4472	3.24932	0.592865	0	27.2894		F (00)	0	48.2898	0	1.22101	0	49.5108		F
	P (00)	0	15.7931	8.04934	43.2275	0	67.0699		P (00)	0	32.5262	16.5777	0	0	49.1039		P
	O (00)	0	0	0	0	0	0		O (00)	0	0	0	0	0	0		O
	All (00)	0	44.2084	11.4717	44.32	0	100		All (00)	0	80.816	16.934	2.25	0	100
							100								100
LS18	Conversion Matrix (in %)	S (06)	C (06)	F (06)	P (06)	O (06)	All (06)	LS18	Change Matrix (in %)	S (06)	C (06)	F (06)	P (06)	O (06)	All (06)
	S (00)	0.118751	0.00247442	0.0142763	0.000901346	0	0.136403		S (00)	0	0.00692061	0.0399289	0.00252094	0	0.0493705		S
	C (00)	0.00253964	4.15682	1.8215	1.41292	3.28228e-05	7.39381		C (00)	0.00710304	0	5.0945	3.95174	9.18009e-05	9.05344		C	23.5211
	F (00)	0.374806	10.8671	13.0083	5.68164	0.0302547	29.9621		F (00)	1.04828	30.3938	0	15.8908	0.0846183	47.4175		F	4.54482
	P (00)	0.00145646	9.81222	5.62694	46.9615	0.102322	62.5044		P (00)	0.00407351	27.4434	15.7378	0	0.286182	43.4715		P	1.52795
	O (00)	0	0	0.000393874	0.00256018	0.000361051	0.0033151		O (00)	0	0	0.00110161	0.00716047	0	0.00826208		O
	All (00)	0.497554	24.8386	20.4714	54.0595	0.132971	100		All (00)	1.05946	57.8441	20.8733	19.8522	0.370892	100
							100								100
LS19	Conversion Matrix (in %)	S (06)	C (06)	F (06)	P (06)	O (06)	All (06)	LS19	Change Matrix (in %)	S (06)	C (06)	F (06)	P (06)	O (06)	All (06)
	S (00)	0	0	0	0	0	0		S (00)	0	0	0	0	0	0		S
	C (00)	0	27.7936	16.8044	1.07791	0	45.6759		C (00)	0	0	35.0016	2.24516	0	37.2467		C
	F (00)	0	24.038	19.476	0.964481	0	44.4784		F (00)	0	50.0682	0	2.0089	0	52.0771		F
	P (00)	0	1.81809	3.30762	4.71999	0	9.8457		P (00)	0	3.78686	6.88937	0	0	10.6762		P
	O (00)	0	0	0	0	0	0		O (00)	0	0	0	0	0	0		O
	All (00)	0	53.6496	39.588	6.76238	0	100		All (00)	0	53.855	41.8909	4.25406	0	100
							100								100
LS20								LS20
																	S
																	C
																	F
																	P
																	O
LS21								LS21
																	S
																	C
																	F
																	P
																	O
LS22	Conversion Matrix (in %)	S (06)	C (06)	F (06)	P (06)	O (06)	All (06)	LS22	Change Matrix (in %)	S (06)	C (06)	F (06)	P (06)	O (06)	All (06)
	S (00)	0	0	0	0	0	0		S (00)	0	0	0	0	0	0		S
	C (00)	0	10.7888	7.80391	0.446119	0	19.0389		C (00)	0	0	13.5313	0.773533	0	14.3049		C
	F (00)	0	19.4358	21.6298	0.14008	0	41.2056		F (00)	0	33.7	0	0.242887	0	33.9429		F
	P (00)	0	22.6696	7.17738	9.90852	0	39.7555		P (00)	0	39.3072	12.445	0	0	51.7522		P
	O (00)	0	0	0	0	0	0		O (00)	0	0	0	0	0	0		O
	All (00)	0	52.8942	36.611	10.4947	0	100		All (00)	0	73.0073	25.9763	1.01642	0	100
							100								100
LS23	Conversion Matrix (in %)	S (06)	C (06)	F (06)	P (06)	O (06)	All (06)	LS23	Change Matrix (in %)	S (06)	C (06)	F (06)	P (06)	O (06)	All (06)
	S (00)	22.2536	0.172756	2.78757	0.504927	0	25.7188		S (00)	0	0.589515	9.51234	1.72302	0	11.8249		S
	C (00)	0.081186	6.52487	2.70202	0.241292	0	9.54937		C (00)	0.27704	0	9.22041	0.823388	0	10.3208		C
	F (00)	6.4604	9.99737	30.7468	2.8816	0	50.0861		F (00)	22.0456	34.1152	0	9.83321	0	65.9939		F
	P (00)	0.032952	1.79069	1.652	11.17	0	14.6457		P (00)	0.112446	6.11059	5.63731	0	0	11.8603		P
	O (00)	0	0	0	0	0	0		O (00)	0	0	0	0	0	0		O
	All (00)	28.8281	18.4857	37.8883	14.7978	0	100		All (00)	22.4351	40.8153	24.3701	12.3796	0	100
							100								100
		S (06)	C (06)	F (06)	P (06)	O (06)	All (06)
	S (00)	0.259224	0.00726108	0.0432008	0.0200576	0	0.329744
	C (00)	0.004361	16.2408	6.43718	1.3725	8.2358e-06	24.0549
	F (00)	0.135056	18.3793	21.9616	3.21953	0.104331	43.7998
	P (00)	0.0063829	6.75346	3.41421	21.4019	0.0436698	31.6196
	O (00)	1.9372e-05	0.069345	0.0176996	0.104642	0.004273	0.195979
	All (00)	0.405044	41.4502	31.8739	26.1186	0.152283	100
							100
		net =	1.76367
		gross =	4.01322
		gross/net ratio	227.549

[truncated: 16 more sheets: RCMRD_Tanzania_00_10, RCMRD_Uganda_00_14, RCMRD_Zambia_00_10, NLCD_01_06, NLCD_06_11, MOFOR_00_03, MOFOR_03_06, MOFOR_06_09, India_95_05, GLC30_00_10_North_America, GLC30_00_10_Africa, GLC30_00_10_East_Oceania, GLC30_00_10_Europe, GLC30_00_10_South_America, GLC30_00_10_East_Asia, GLC30_00_10_West_Asia]
